# Supplementary material for: Resolution of deep angiosperm phylogeny using conserved nuclear genes and estimates of early divergence times
Source: PubMed Central journal article supplement (PMC4200517; doi:10.1038/ncomms5956), 2014-09-24
Supplement: ncomms5956-s1.pdf [file ncomms5956-s1.pdf]

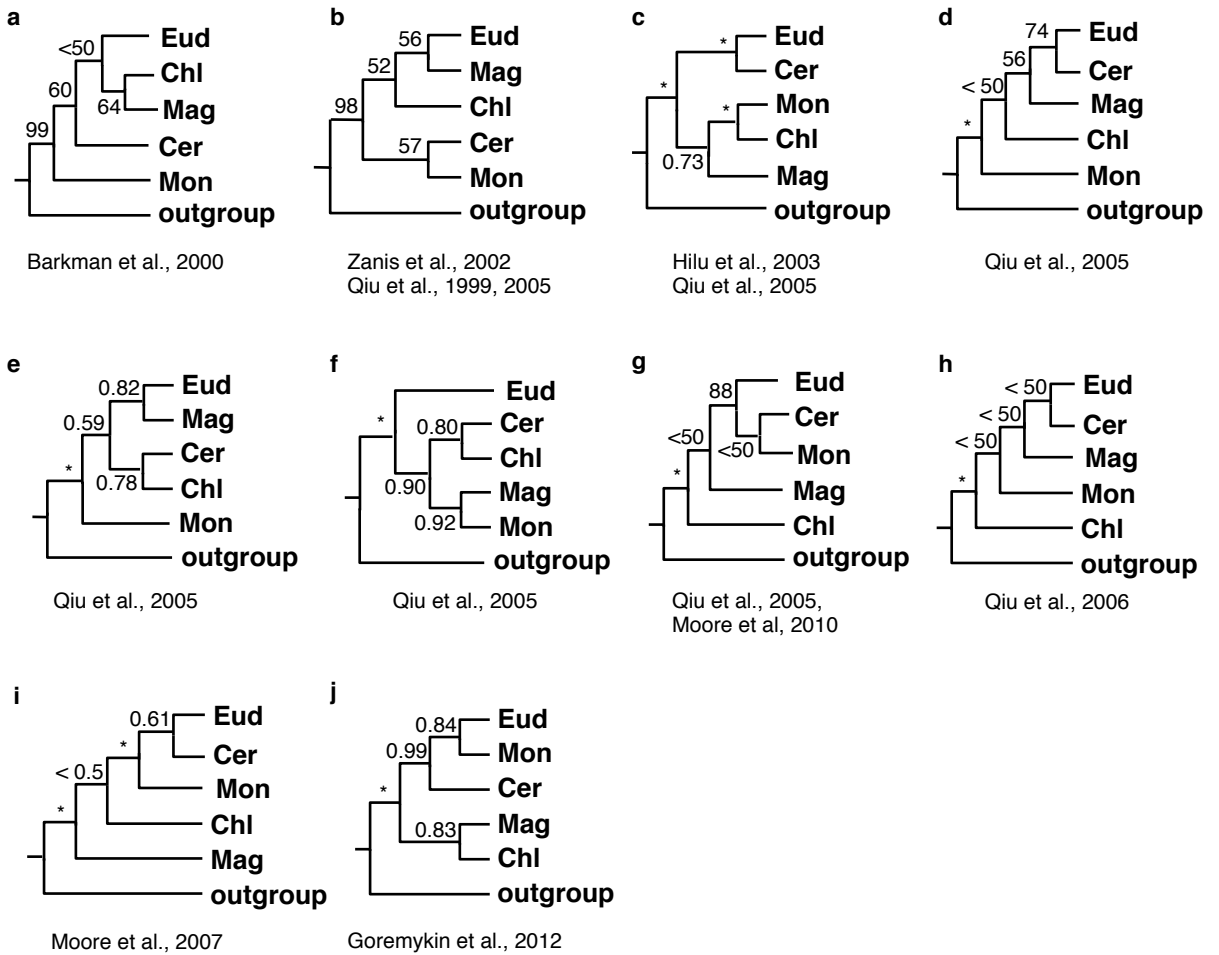

**Supplementary Fig. 1. Ten additional alternative topologies among eudicots (Eud), monocots (Mon), magnoliids (Mag), Ceratophyllaceae (Cer) and Chloranthaceae (Chl) modified from previous studies. An asterisk indicates that the bootstrap value or posterior probability reached 100% or 1.0, respectively. Other bootstrap values ( $0 < BS < 100$ ) or posterior probabilities ( $0 < PP < 1.0$ ) are indicated.**

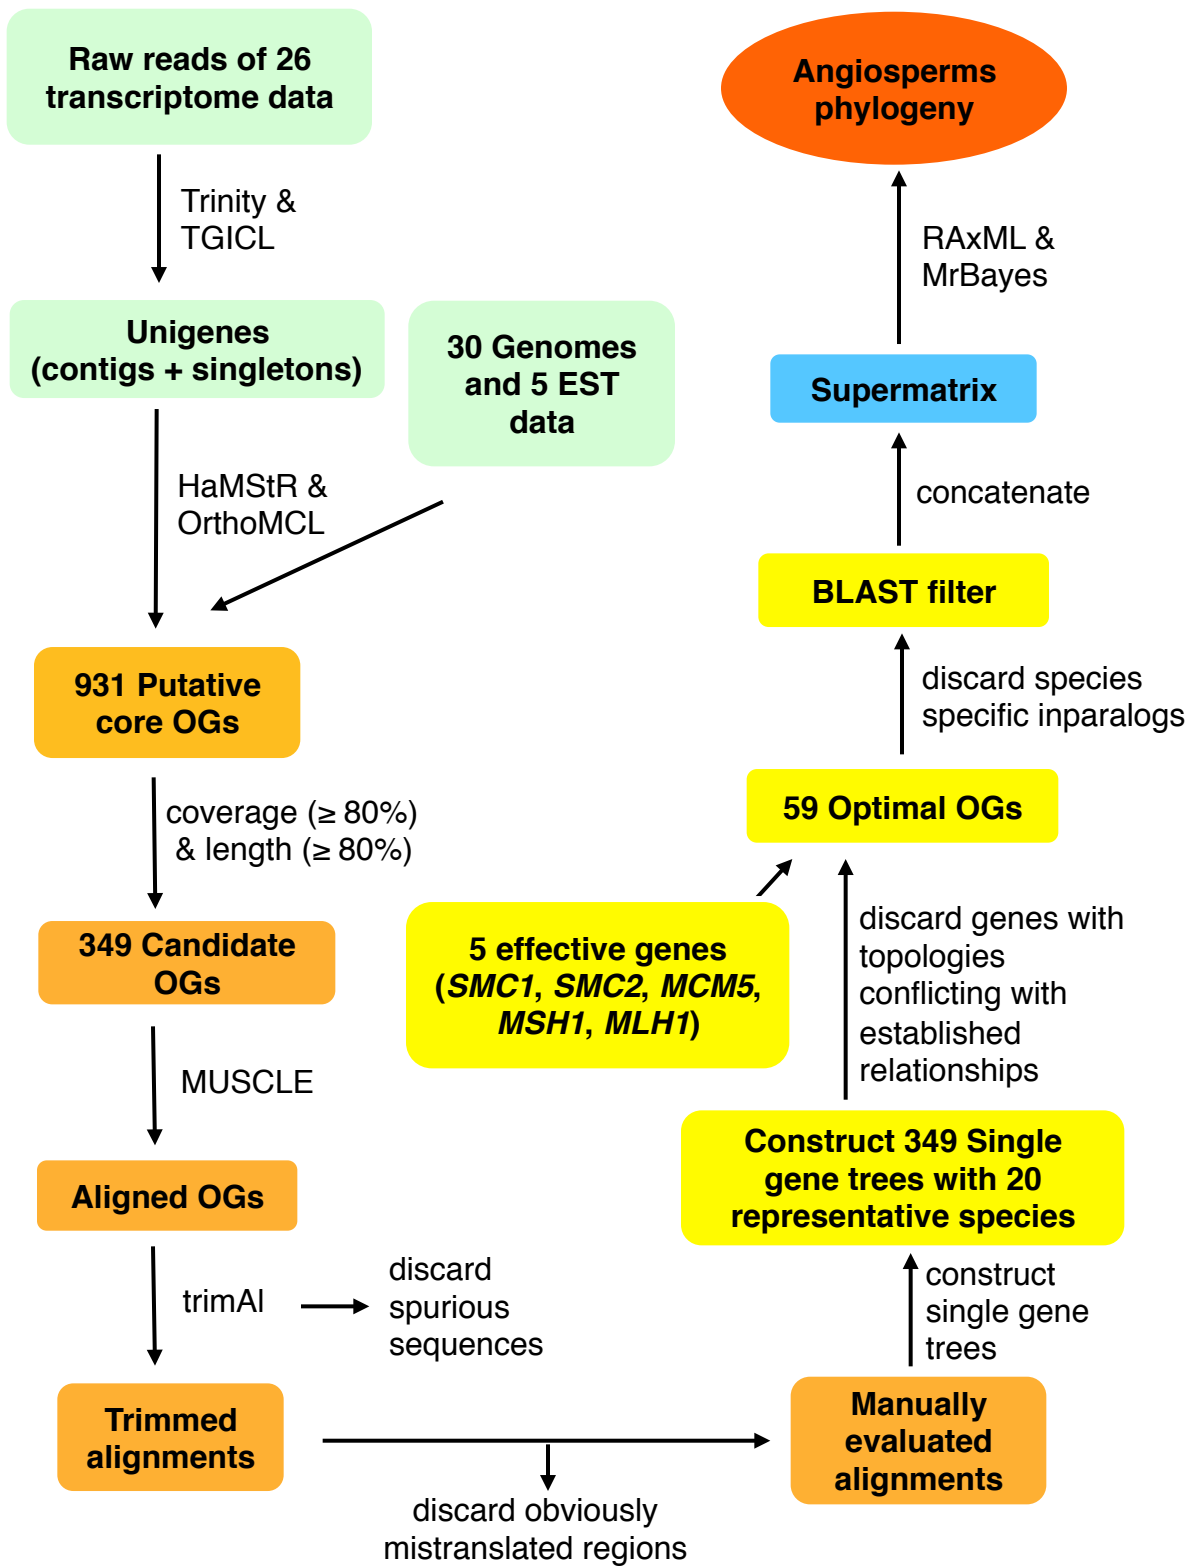

Supplementary Fig. 2. Flowchart of data analysis.

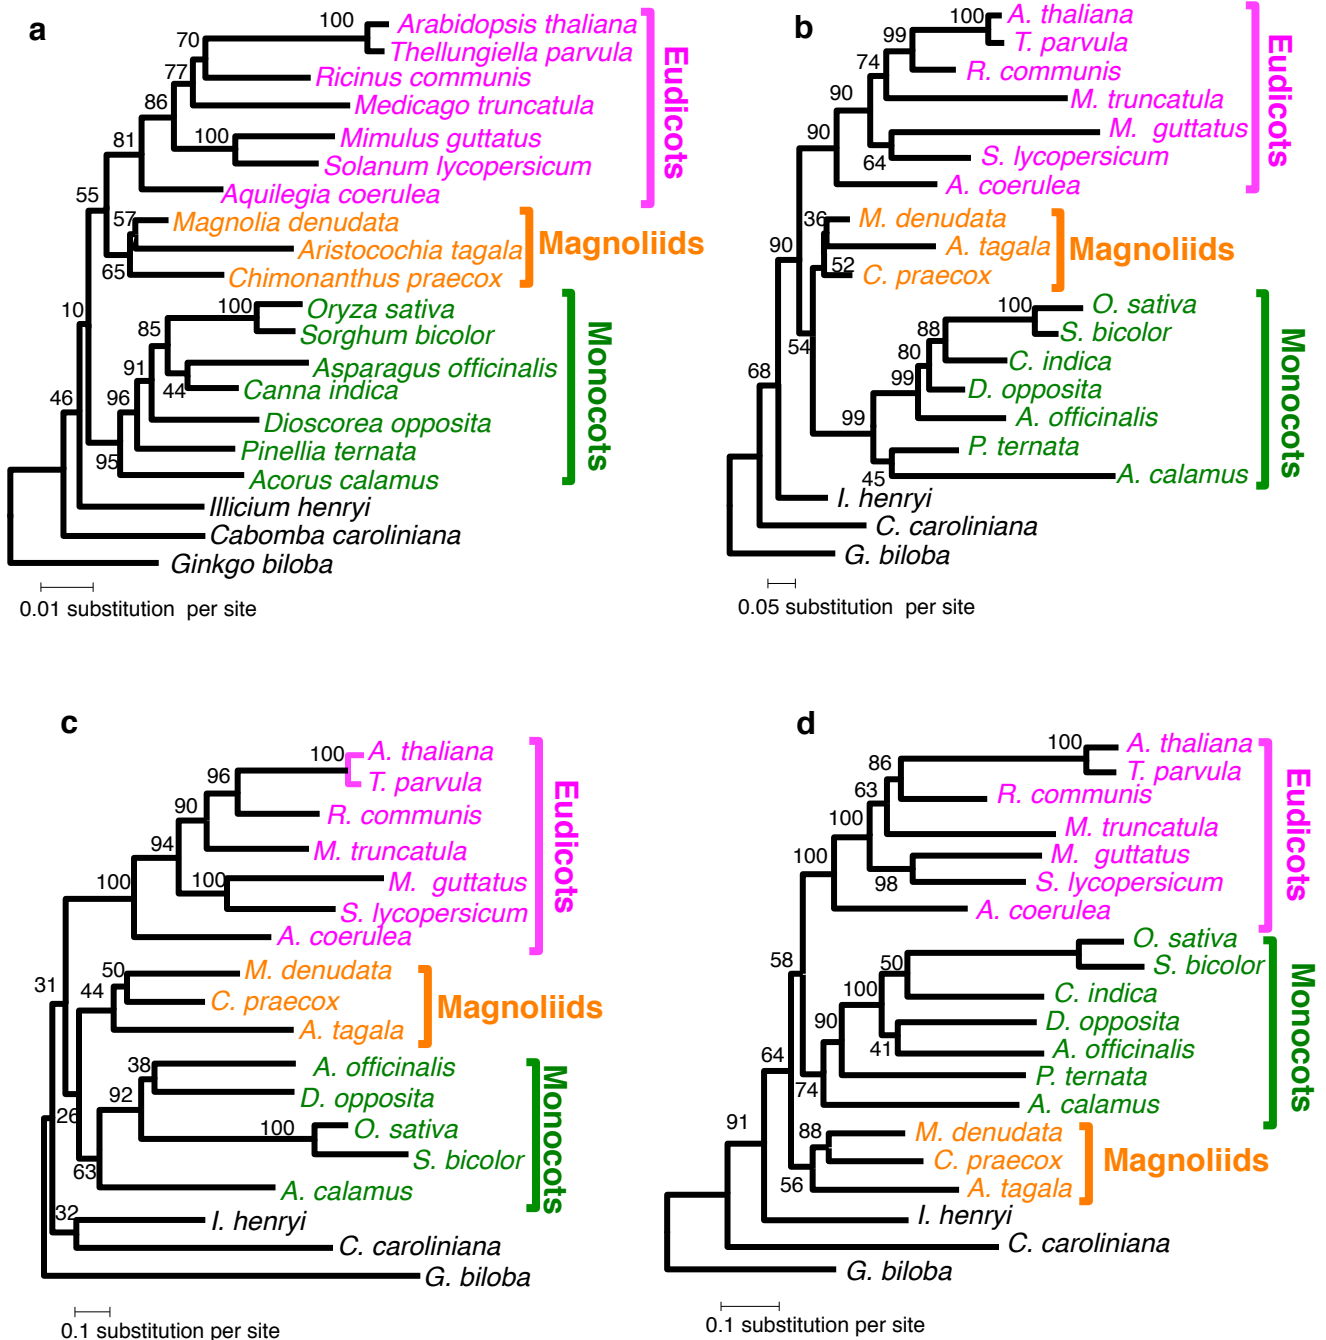

**Supplementary Fig. 3 (a-d). Examples of single gene trees of selected marker genes in accordance with species trees of 20 representative species with established relationships.** Taxa in different major groups of mesangiosperms are shown in different colors as indicated. Numbers in each nodes are ML bootstrap values obtained by RAxML.

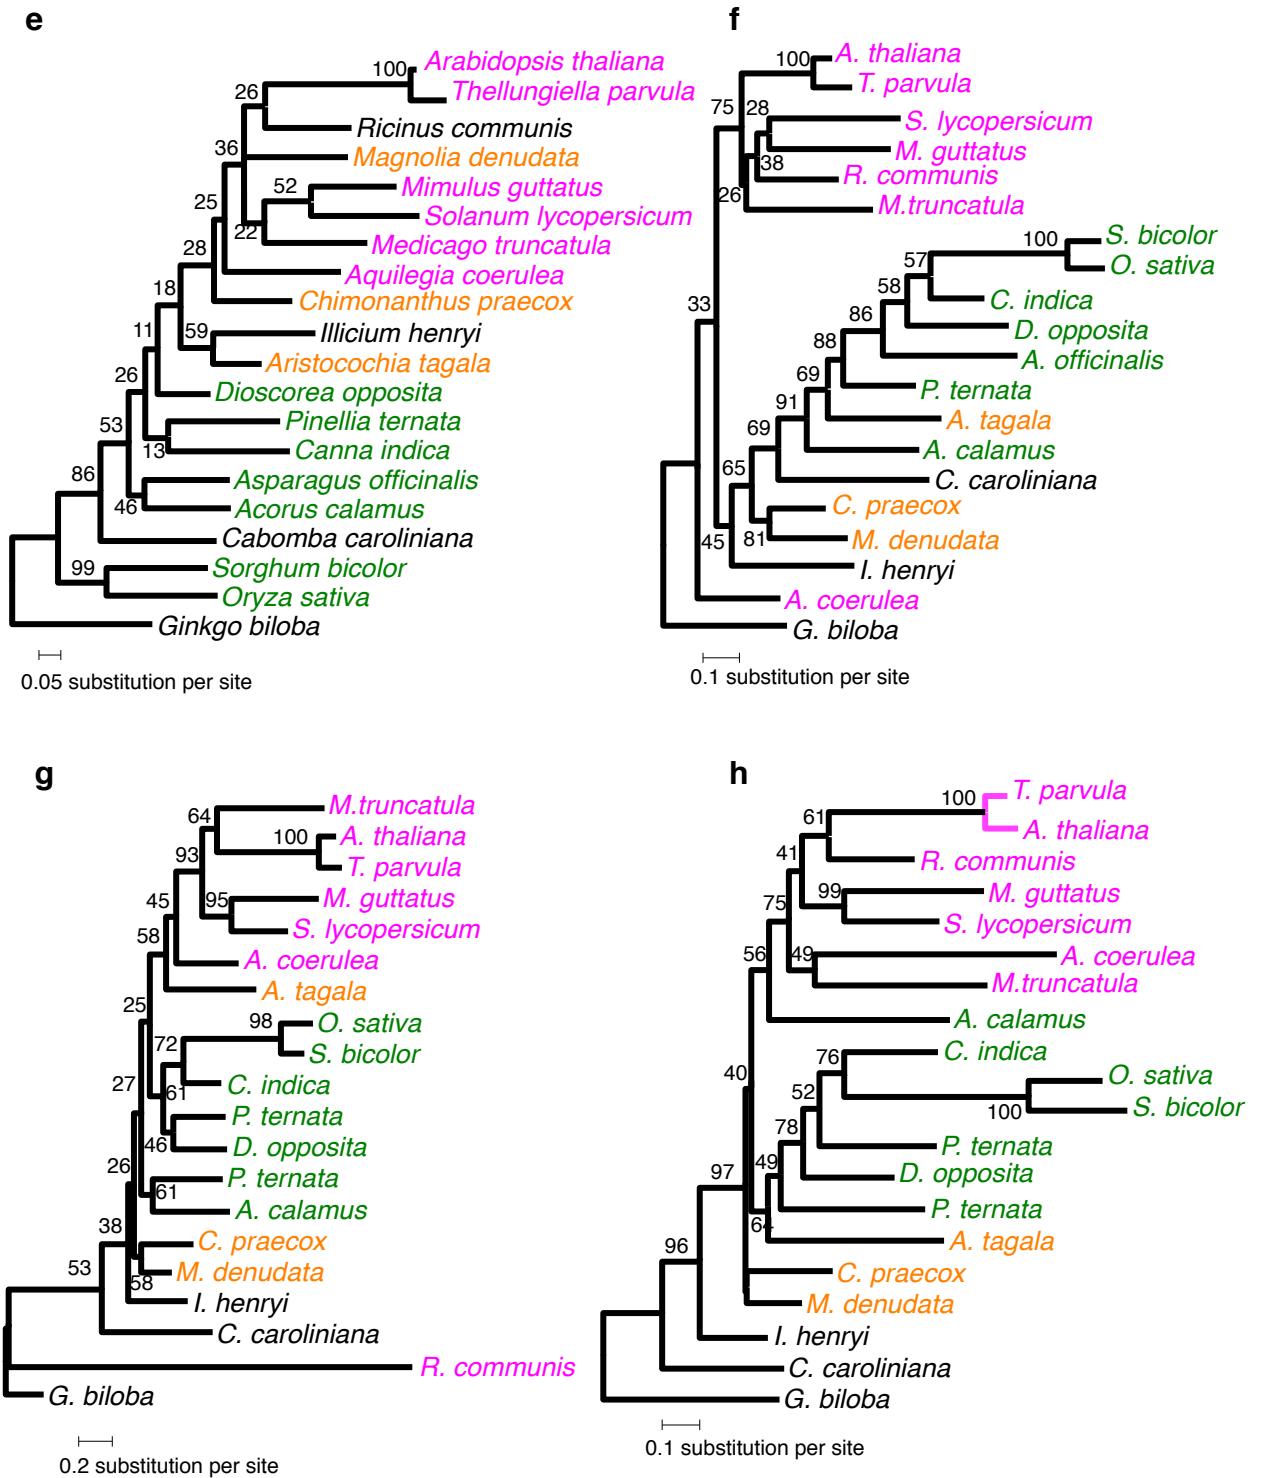

**Supplementary Fig. 3 (e-h). Examples of single gene trees for excluded candidate genes conflicting with species trees of 20 representative species with established relationships. Numbers in each nodes are ML bootstrap obtained by RAxML. Species in purple, green and red are from eudicots, monocots and magnoliids, respectively.**

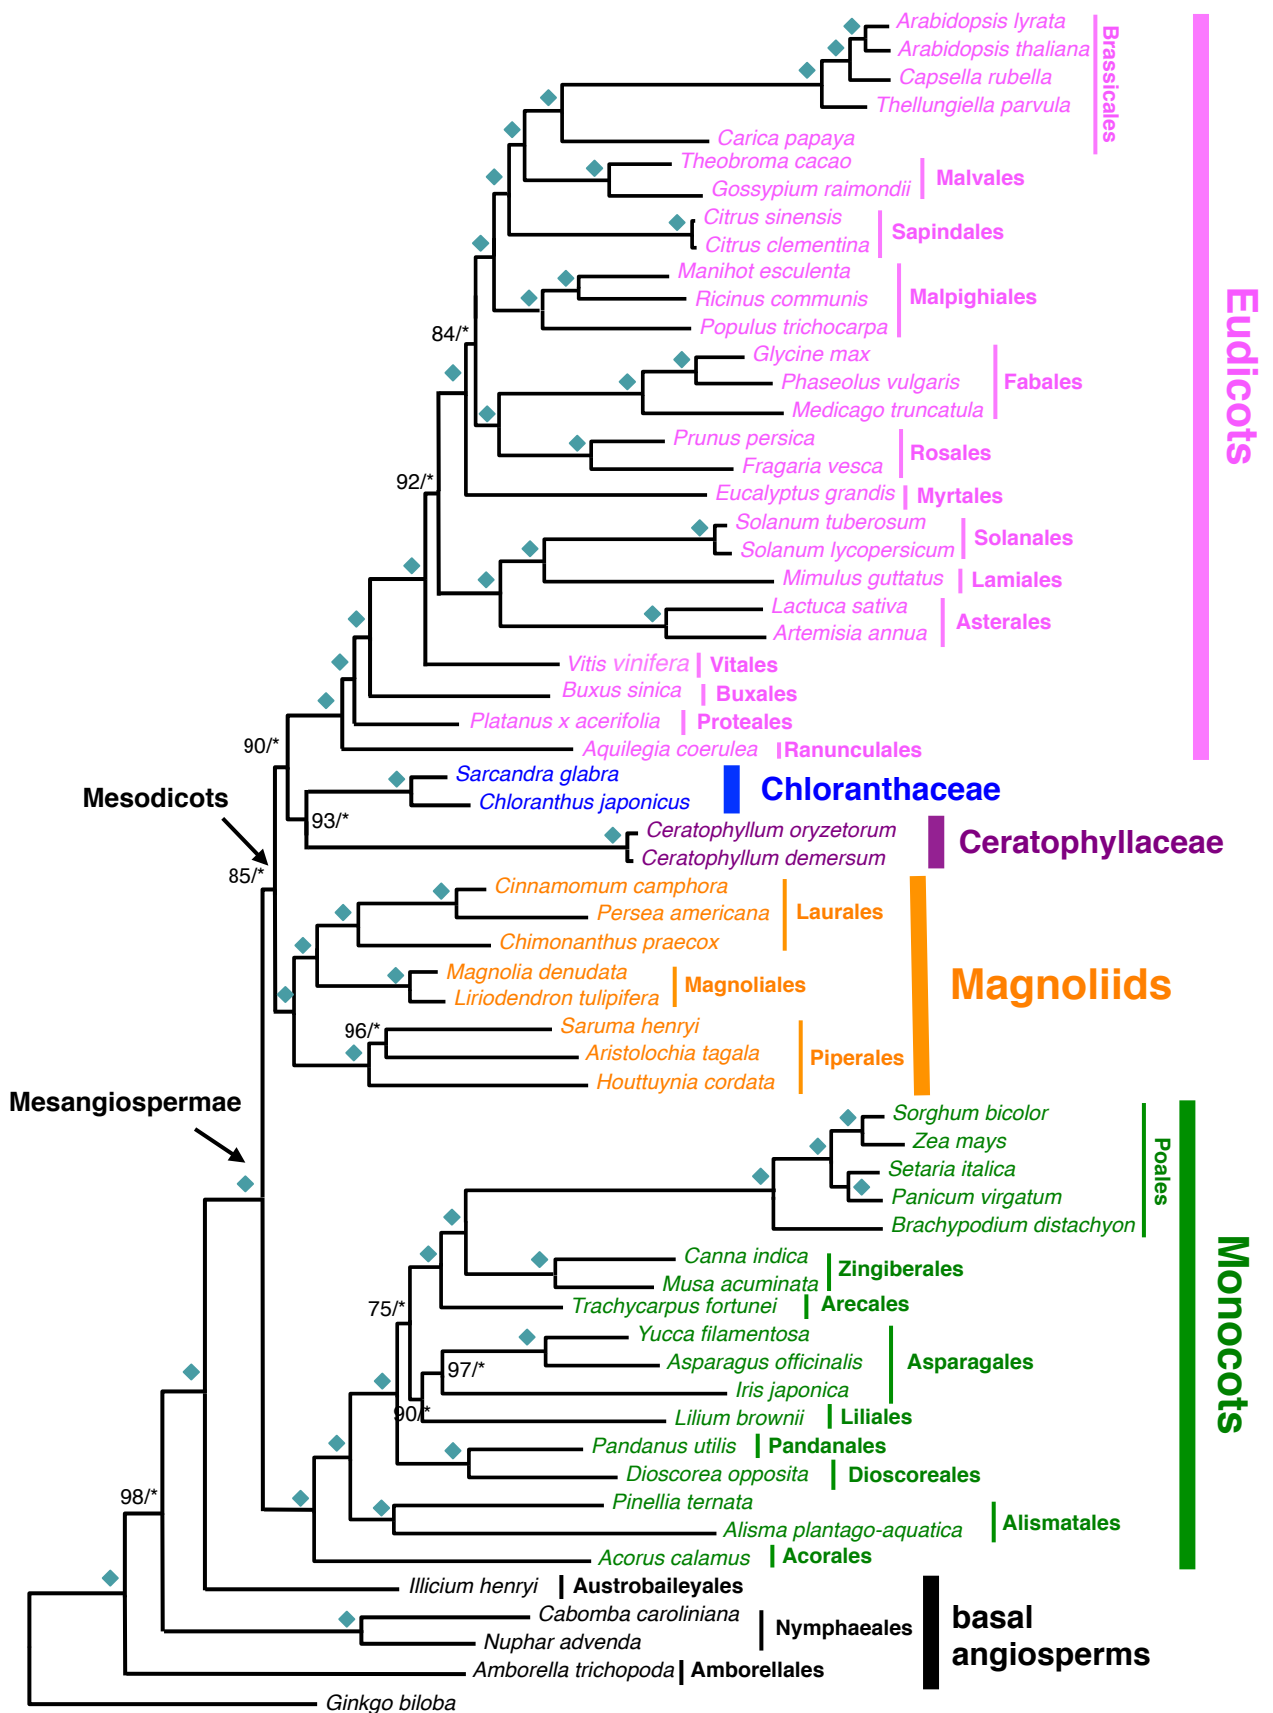

**Supplementary Fig. 4. The ML tree reconstructed using 59 genes of 61 species without gene partition.** Numbers associated with nodes are the bootstrap value (BS, on the left) obtained by RAxML and the posterior probability (PP, on the right) obtained by MrBayes based on concatenated 59 genes. Asterisks indicate BS of 100% or PP of 1.0. Diamonds indicate BS of 100% and PP of 1.0.

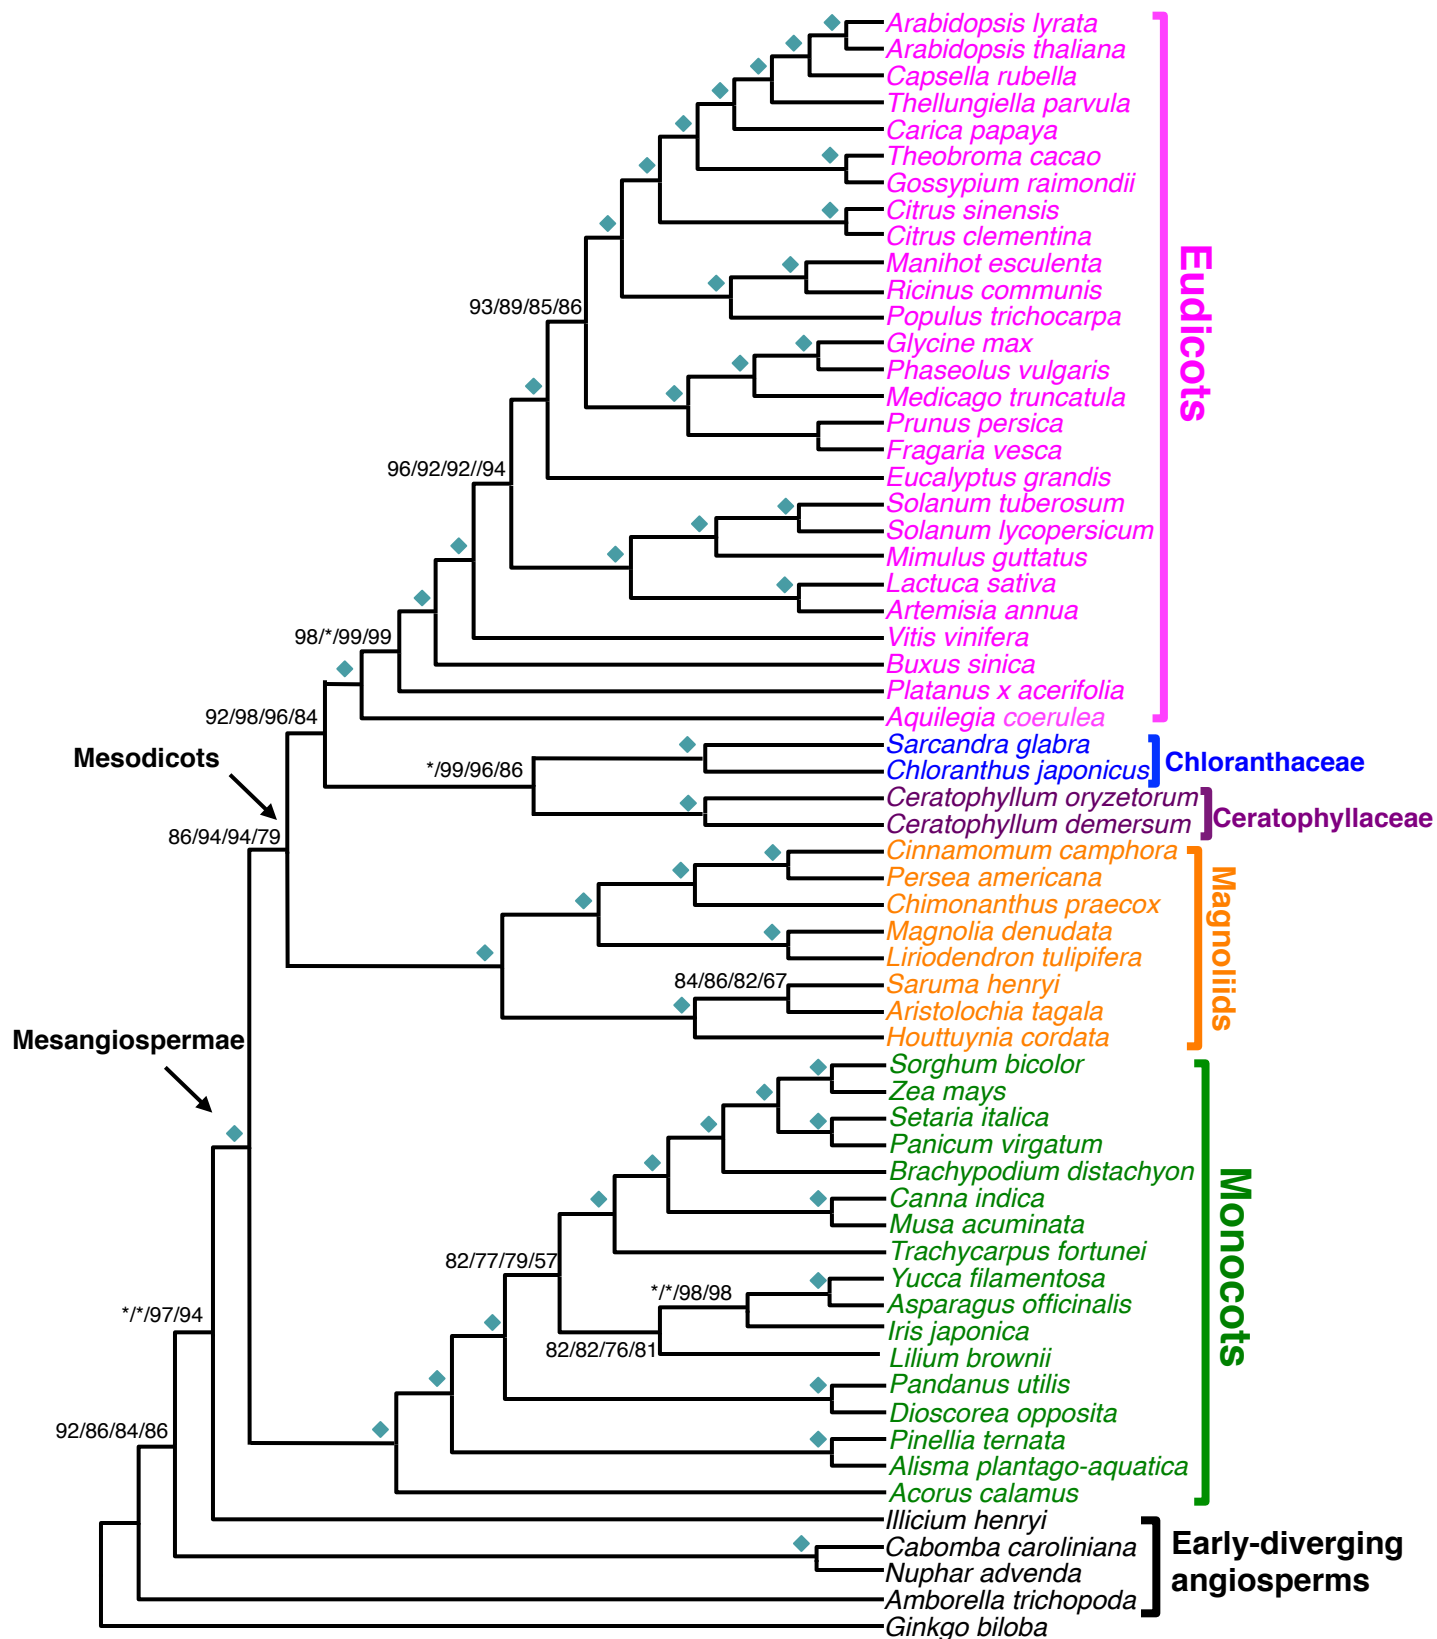

**Supplementary Fig. 5. Trees based on different evolutionary models.** This cladogram was inferred by RAxML based on concatenated 59-gene amino acid sequences. Taxa in different major groups of mesangiosperms are shown in different colors as indicated. Numbers associated with branches are bootstrap values (BS) based on JTT + CAT, JTT + G, WAG + CAT, and DAYHOFF + CAT from left to right; BS of 100% is indicated by asterisk; a diamond indicates that all four BS values are 100%.

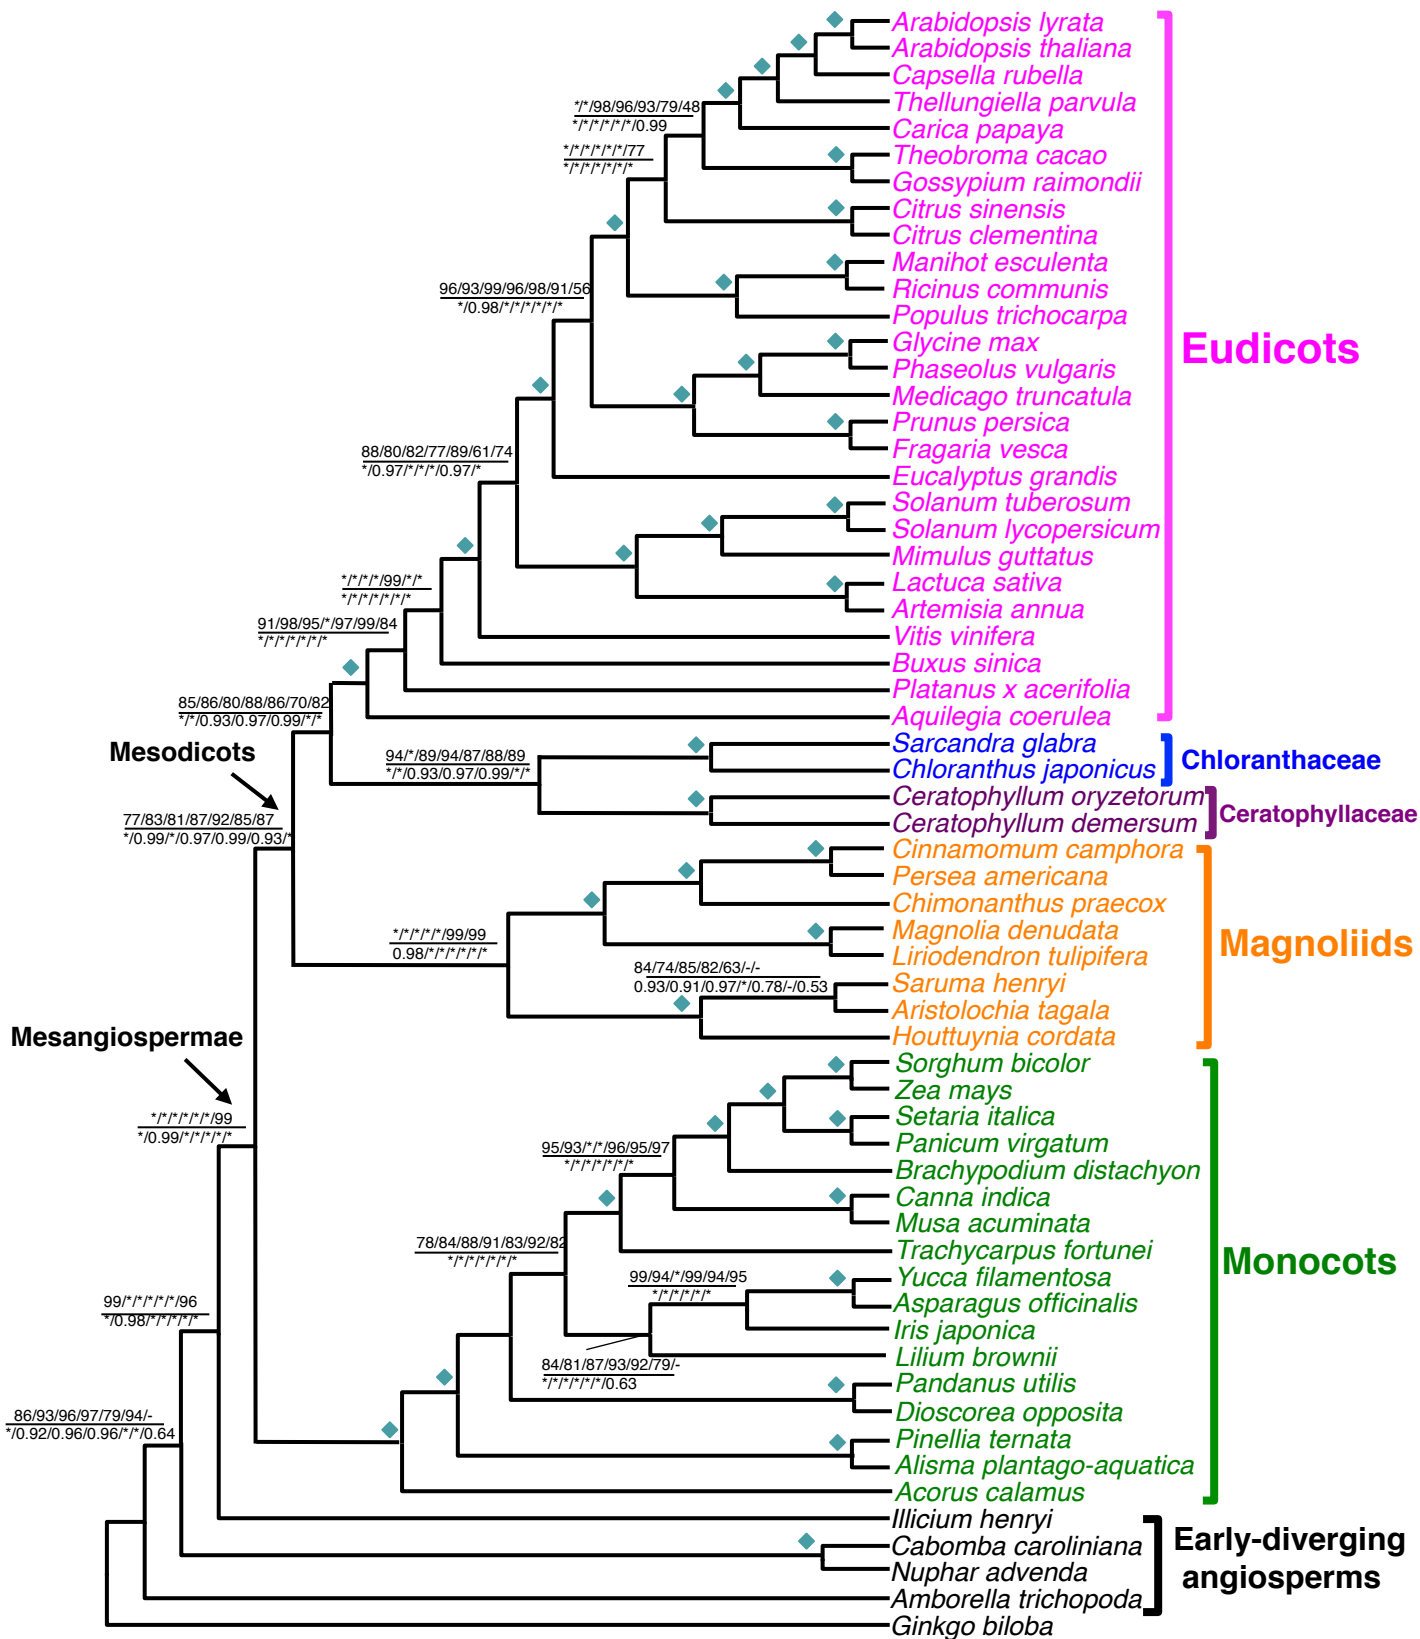

**Supplementary Fig. 6. Trees based on different numbers of genes.** A cladogram inferred using RAxML based on concatenated 59-gene amino acid sequences. Numbers associated with branches are bootstrap values (above) obtained by RAxML and posterior probability (below) obtained by MrBayes based on 55, 50, 46, 41, 33, 25 and 16 genes from left to right, respectively. A diamond indicates all seven bootstrap values and posterior possibilities on this node reaching 100% and 1.0. A dash indicates different topology at this node when compared with the 59-gene tree.

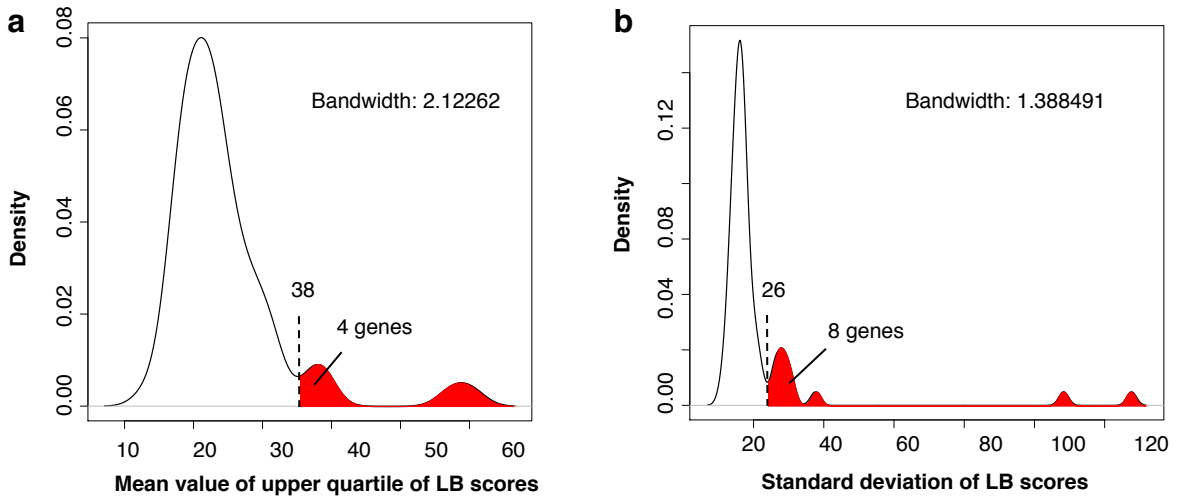

**Supplementary Fig. 7. Density plots generated with R of different gene-specific long-branch indices for the 59 genes. (a) Average of the upper quartile of LB scores representing the genes with the longest branches. (b) Standard deviation of LB scores measuring heterogeneity. Dashed line indicates starting shoulder value. Red areas in the right-hand side indicate deviations from the normal distribution and comprise genes might be long branches.**



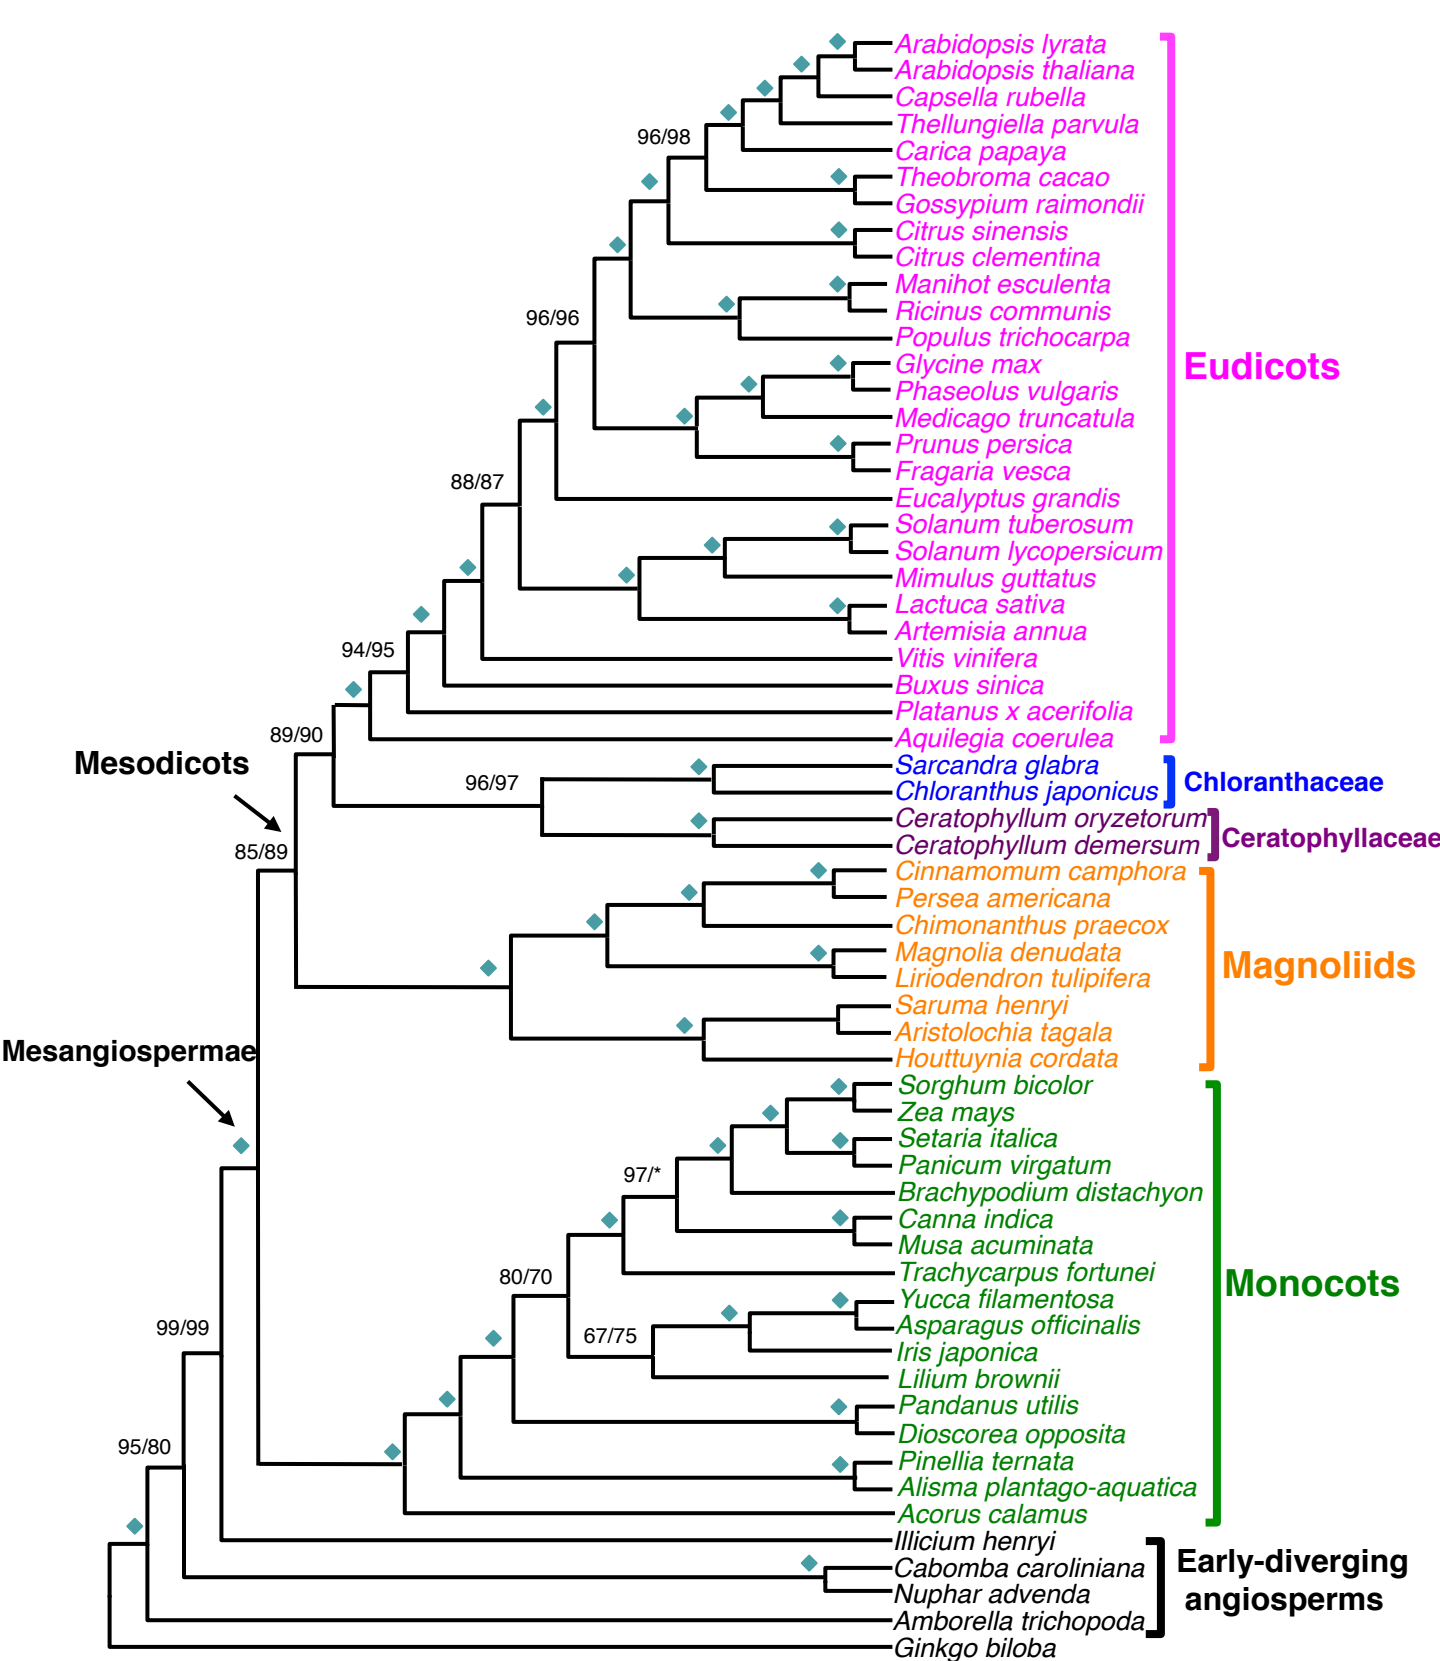

**Supplementary Fig. 8. ML Trees inferred by removing genes with high long branch scores.** A cladogram inferred using RAxML based on concatenated 55-gene amino acid sequences. Numbers associated with branches are bootstrap (BS) values obtained by RAxML based on 55 and 51 genes, which excluded four (gene ID: 434655, 434734, 434354 and MCM5) and eight (gene ID: 434655, 434734, 434354, MCM5, 432200, 431723, 433581 and 434860) genes according to gene-specific long-branch scores, from left to right, respectively. A diamond indicates both BS values of 100% at this node. An asterisk indicates one of the BS values at this node being 100%. Other BS values are indicated.

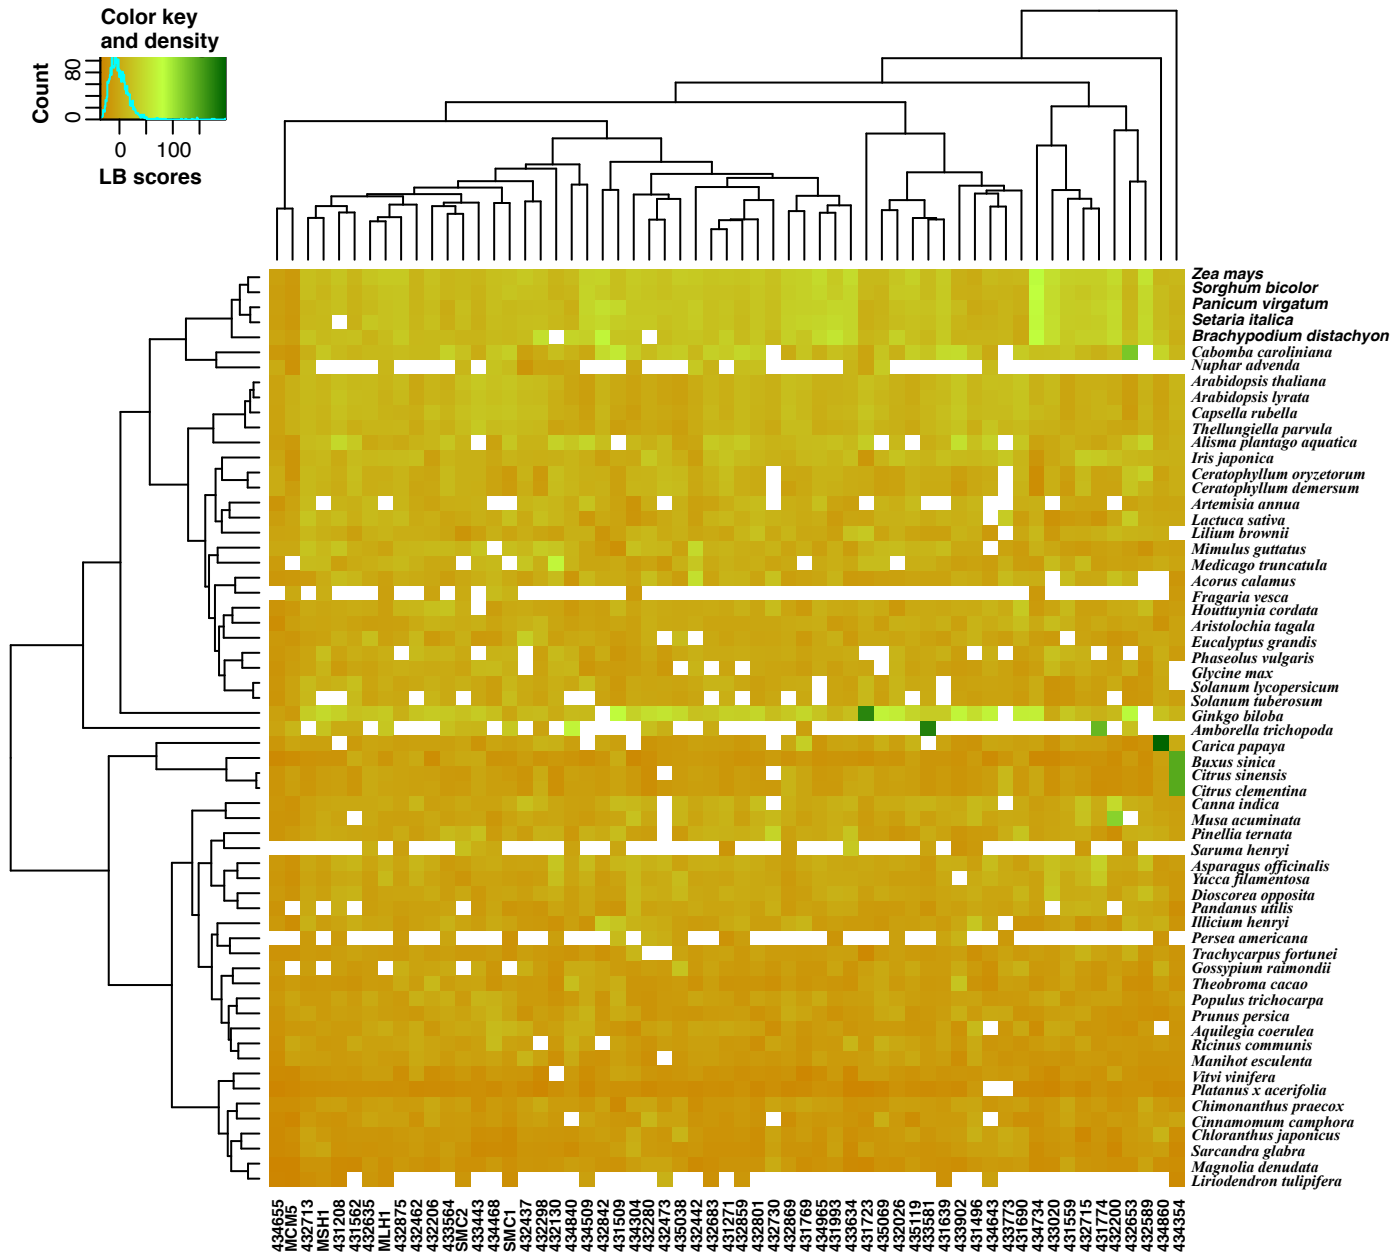

**Supplementary Fig. 9. Heat map in combination with hierarchical clustering generated with R of the taxon-specific long-branch scores for 59 genes of 61 species.** Row show taxa and columns genes. Color key and density plot of long-branch (LB) scores are shown in the upper left corner of the heat map. White cells in the map indicate that the taxon was lacking in that gene. Orange cells indicate that the taxon with low LB scores indicate that the taxon in that gene might be not affected by long-branch attraction. Dark green cells (genes with ID of 434680 in *Carica papaya*, 433581 in *Amborella trichopoda* and 431723 in *Ginkgo biloba*) with high LB scores indicate that the taxon in that gene might be a long-branch.

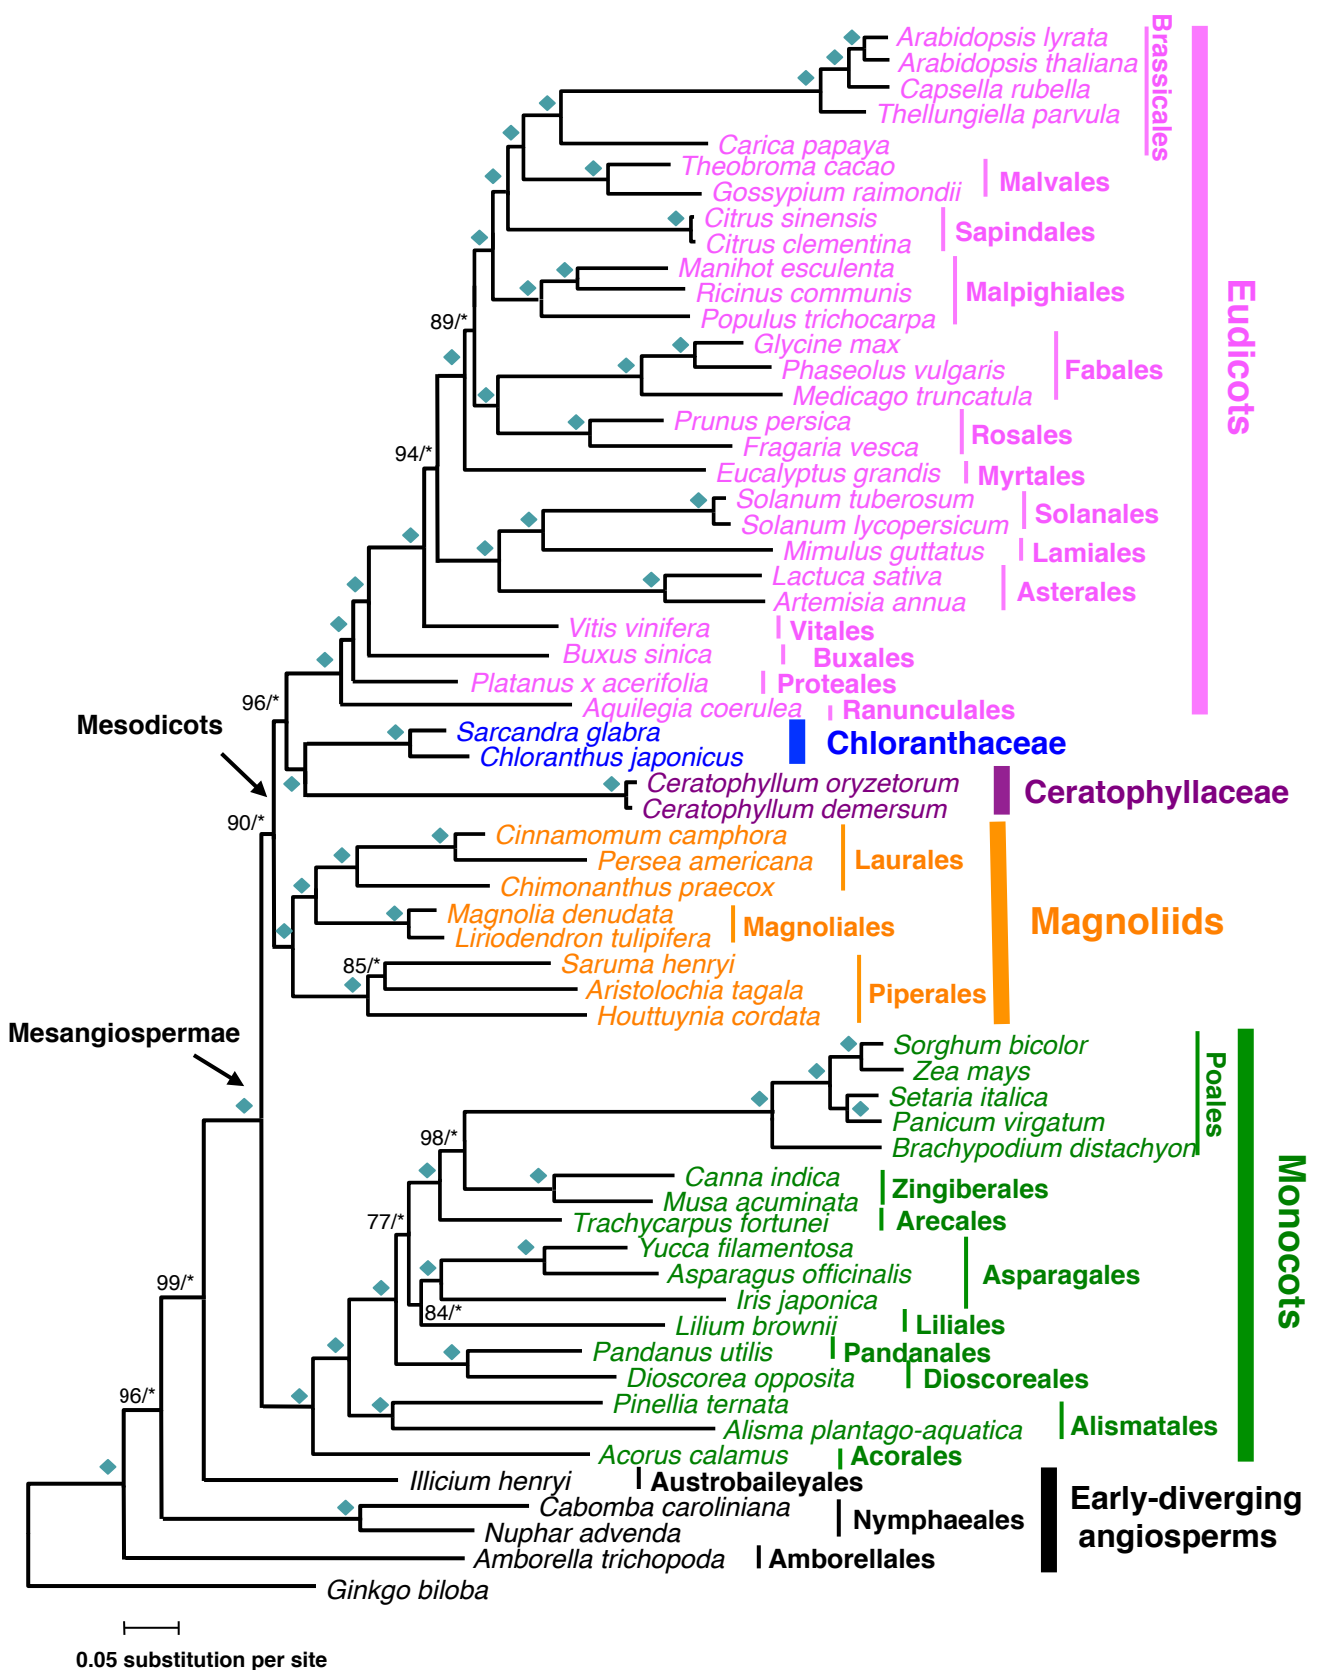

**Supplementary Fig. 10. A phylogram of the best ML tree inferred using RAxML based on concatenated 59-gene amino acid sequences from 61 species.** Genes with ID of 434680 in *Carica papaya*, 433581 in *Amborella trichopoda* and 431723 in *Ginkgo biloba* with the highest LB scores according to Supplementary Fig 9 were excluded in this analysis. Numbers associated with branches are bootstrap value (BS) and posterior probability (PP) inferred by RAxML and MrBayes, respectively. An asterisk indicates PP of 1.0. A diamond indicates BS of 100% and PP of 1.0 at the same time.

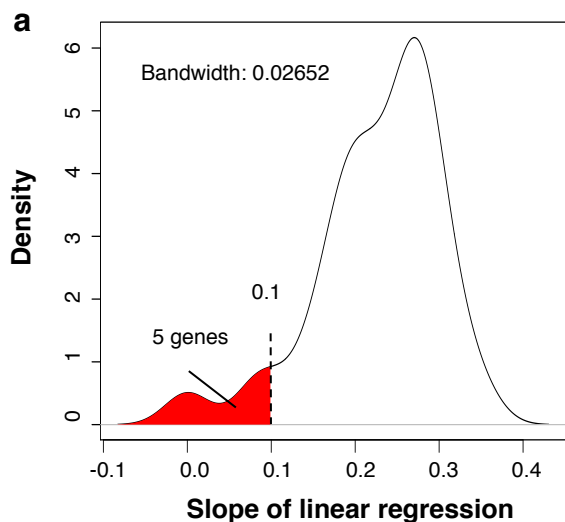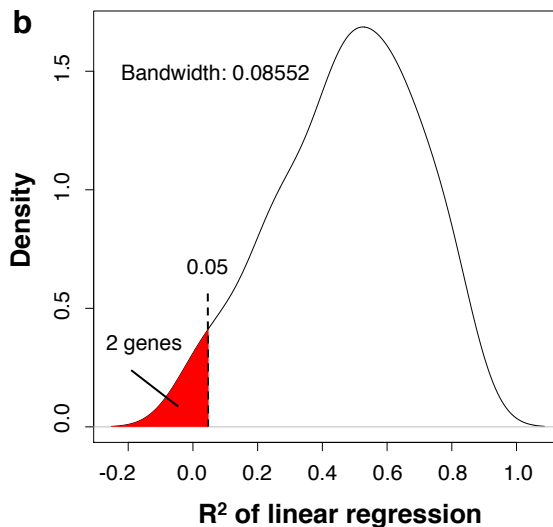

**Supplementary Fig. 11 Density plots (distribution) of different gene-specific saturation indices for the 59 genes generated with R . (A) Slopes of the linear regression between patristic and uncorrected pairwise distances. (B)  $R^2$  of the linear regression between patristic and uncorrected pairwise distances. Dashed line indicates starting shoulder value. Red areas in the left-hand side comprise genes that might be saturated.**

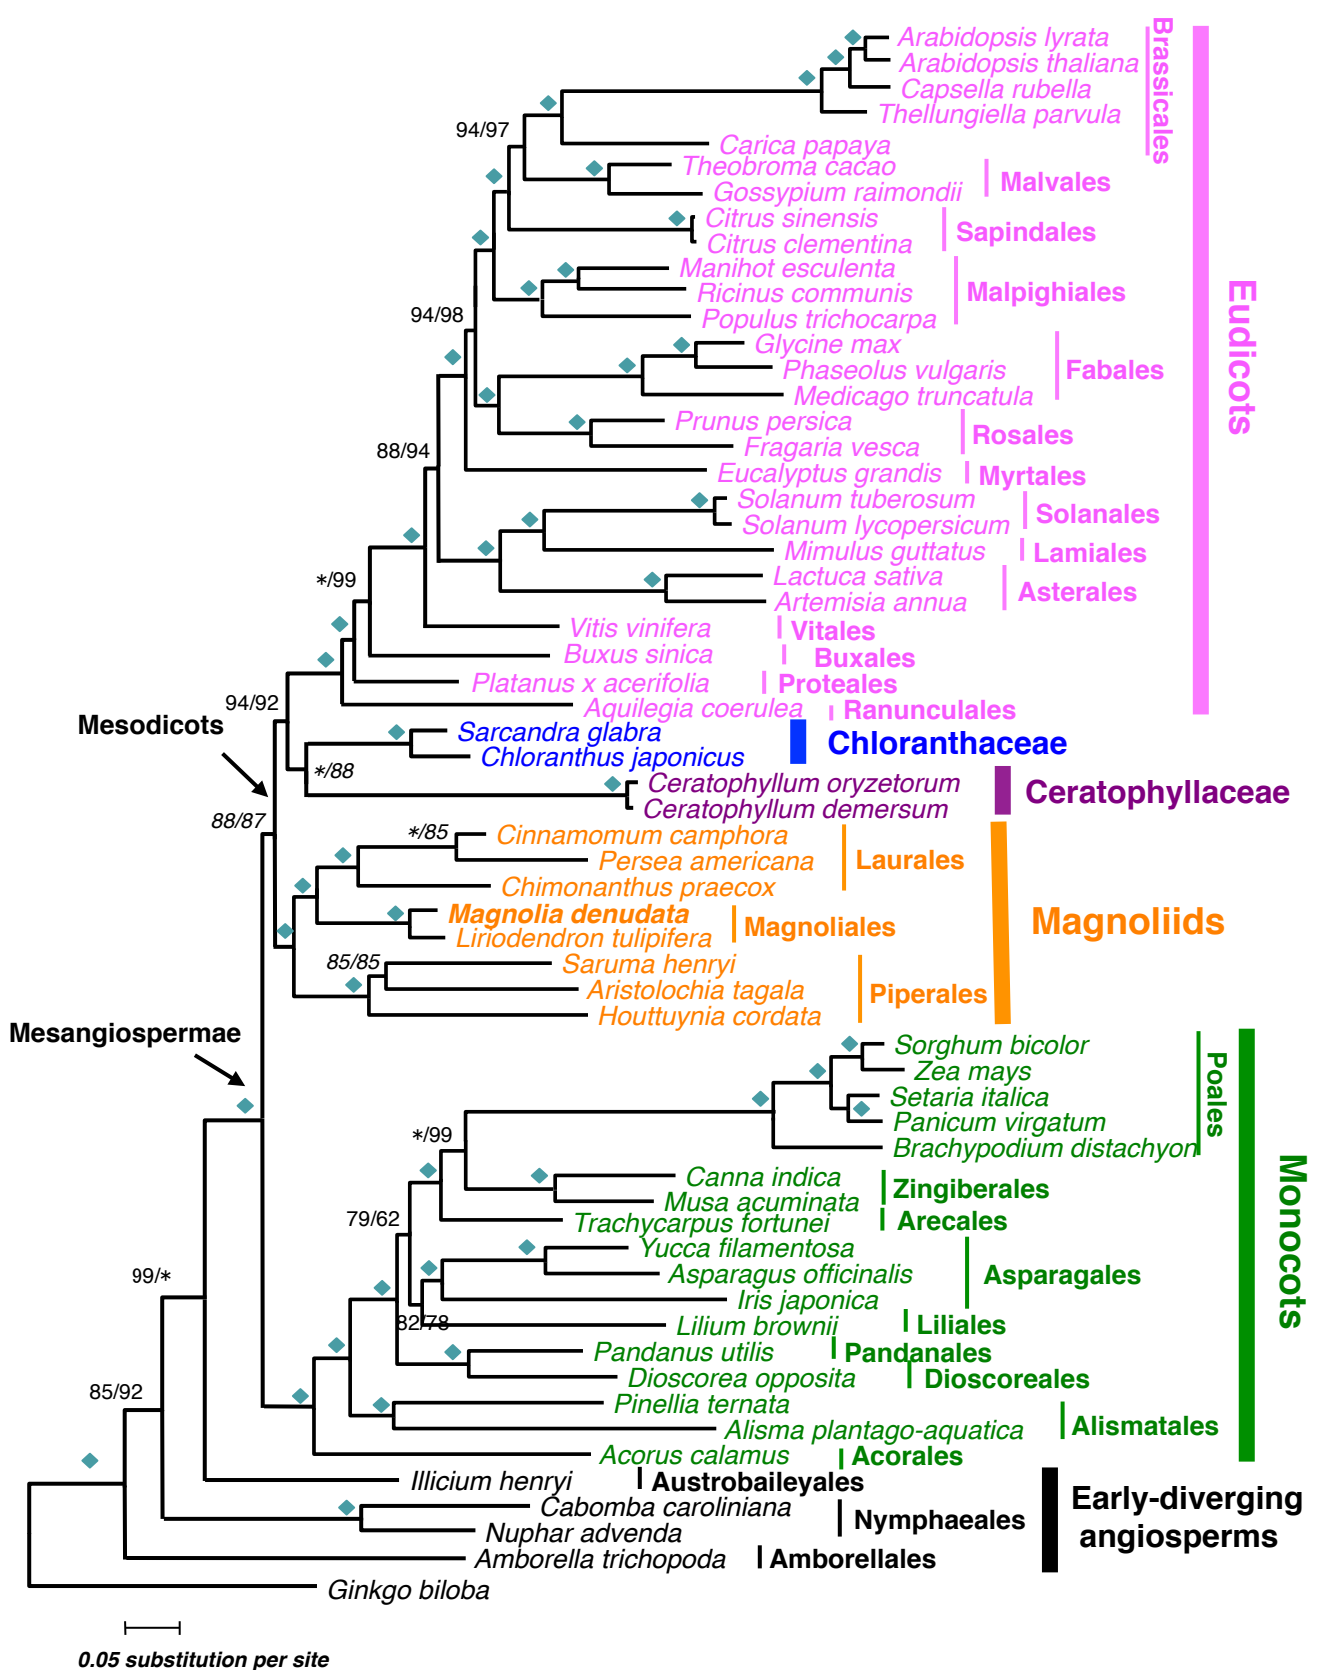

**Supplementary Fig. 12. A phylogram of the best ML tree inferred using RAxML based on unsaturated genes amino acid sequences from 61 species.** Numbers associated with branches are bootstrap (BS) values obtained by RAxML based on 54 and 57 genes, which excluded five genes (gene ID: 434655, MCM5, 433581, 431774 and MSH1) with Slope  $\leq 0.1$  and two genes (gene ID: 434655 and MCM5) with  $R^2 \leq 0.05$  according to Supplementary Fig 11, respectively, from 59-gene dataset. An asterisk indicates BS of 100% and a diamond indicates both two BS on this node of 100%.

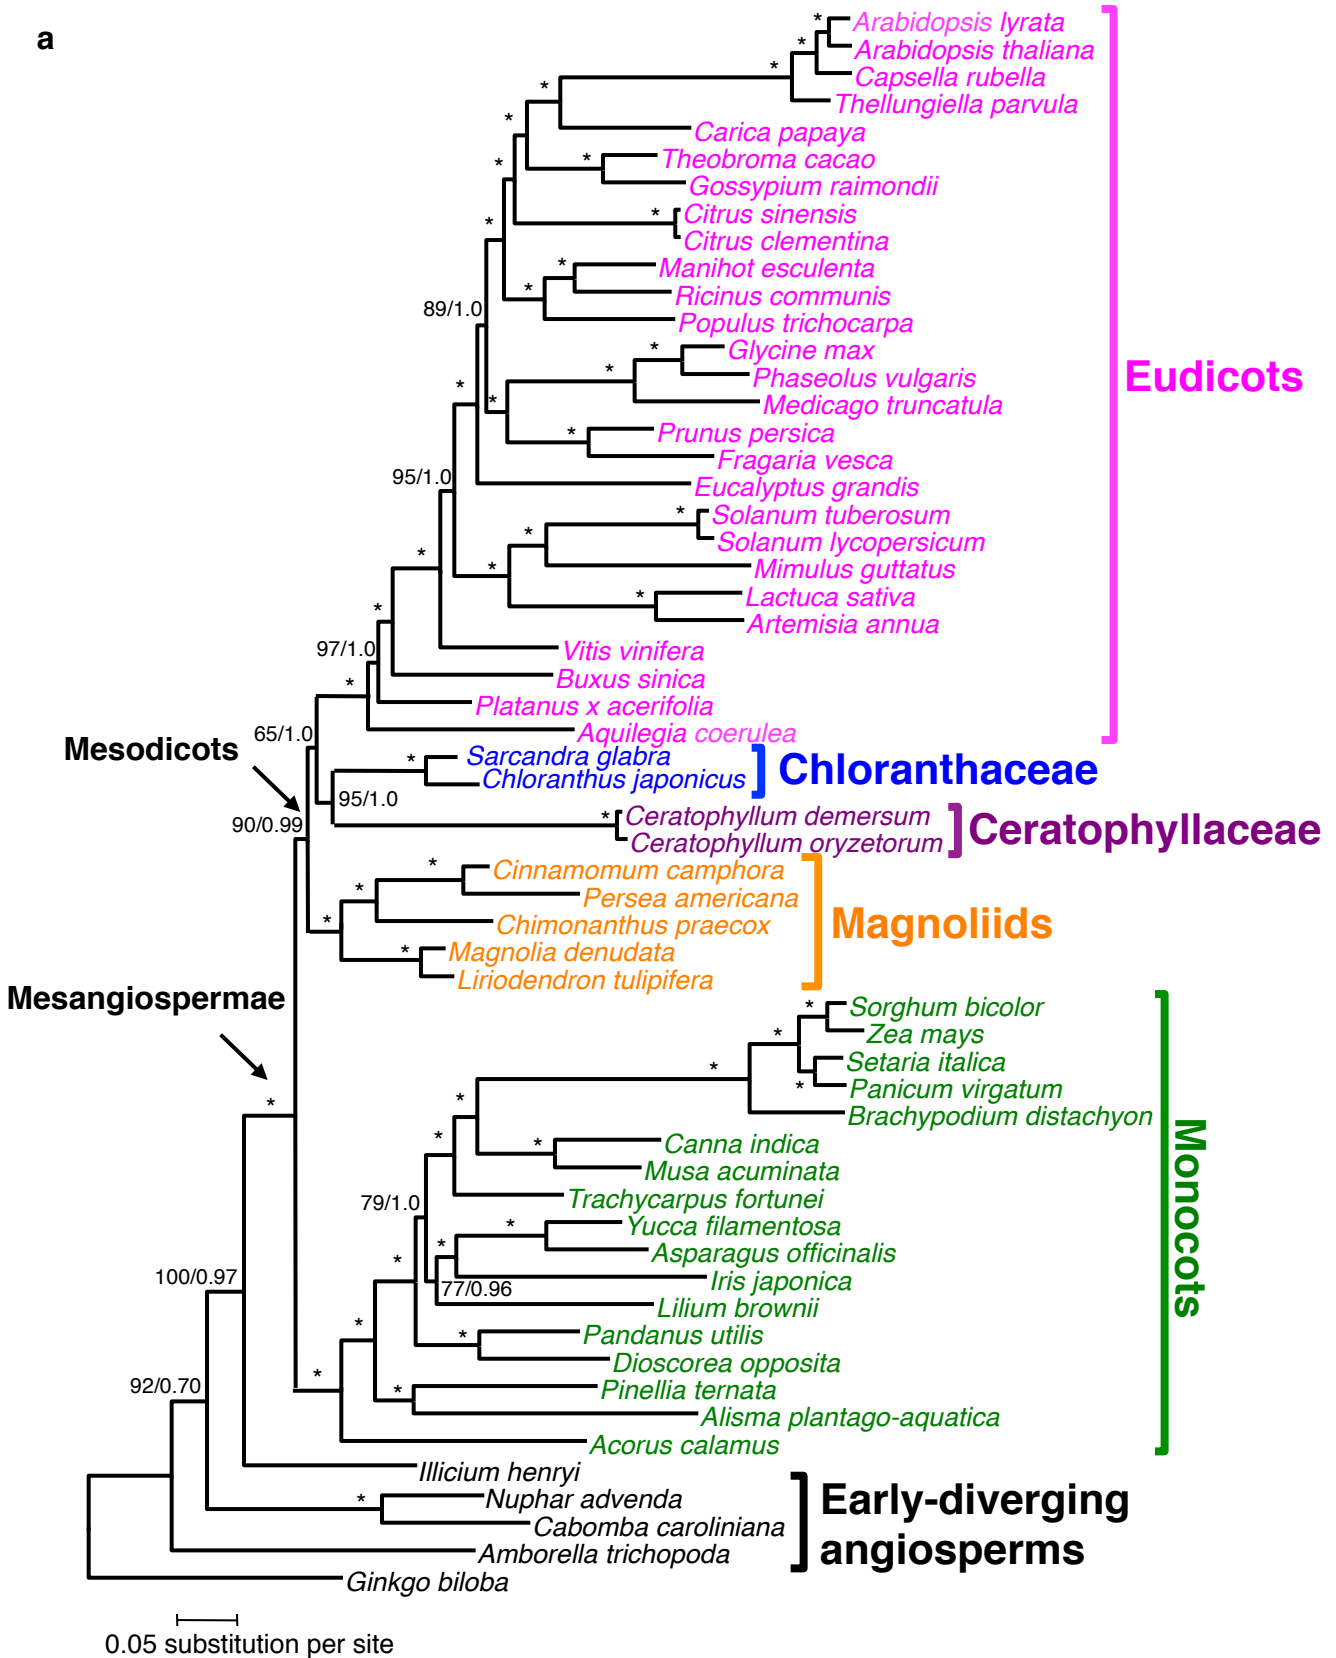

**Supplementary Fig. 13a. A phylogram of the best ML tree inferred using RAxML based on concatenated 59-gene amino acid sequences from 58 species.** Three species from Piperales of magnoliids were excluded in this analysis; numbers associated with branches are bootstrap values (BS) and posterior probability (PP) inferred by RAxML and MrBayes, respectively; an asterisk indicates BS of 100% and PP of 1.0 at the same time.

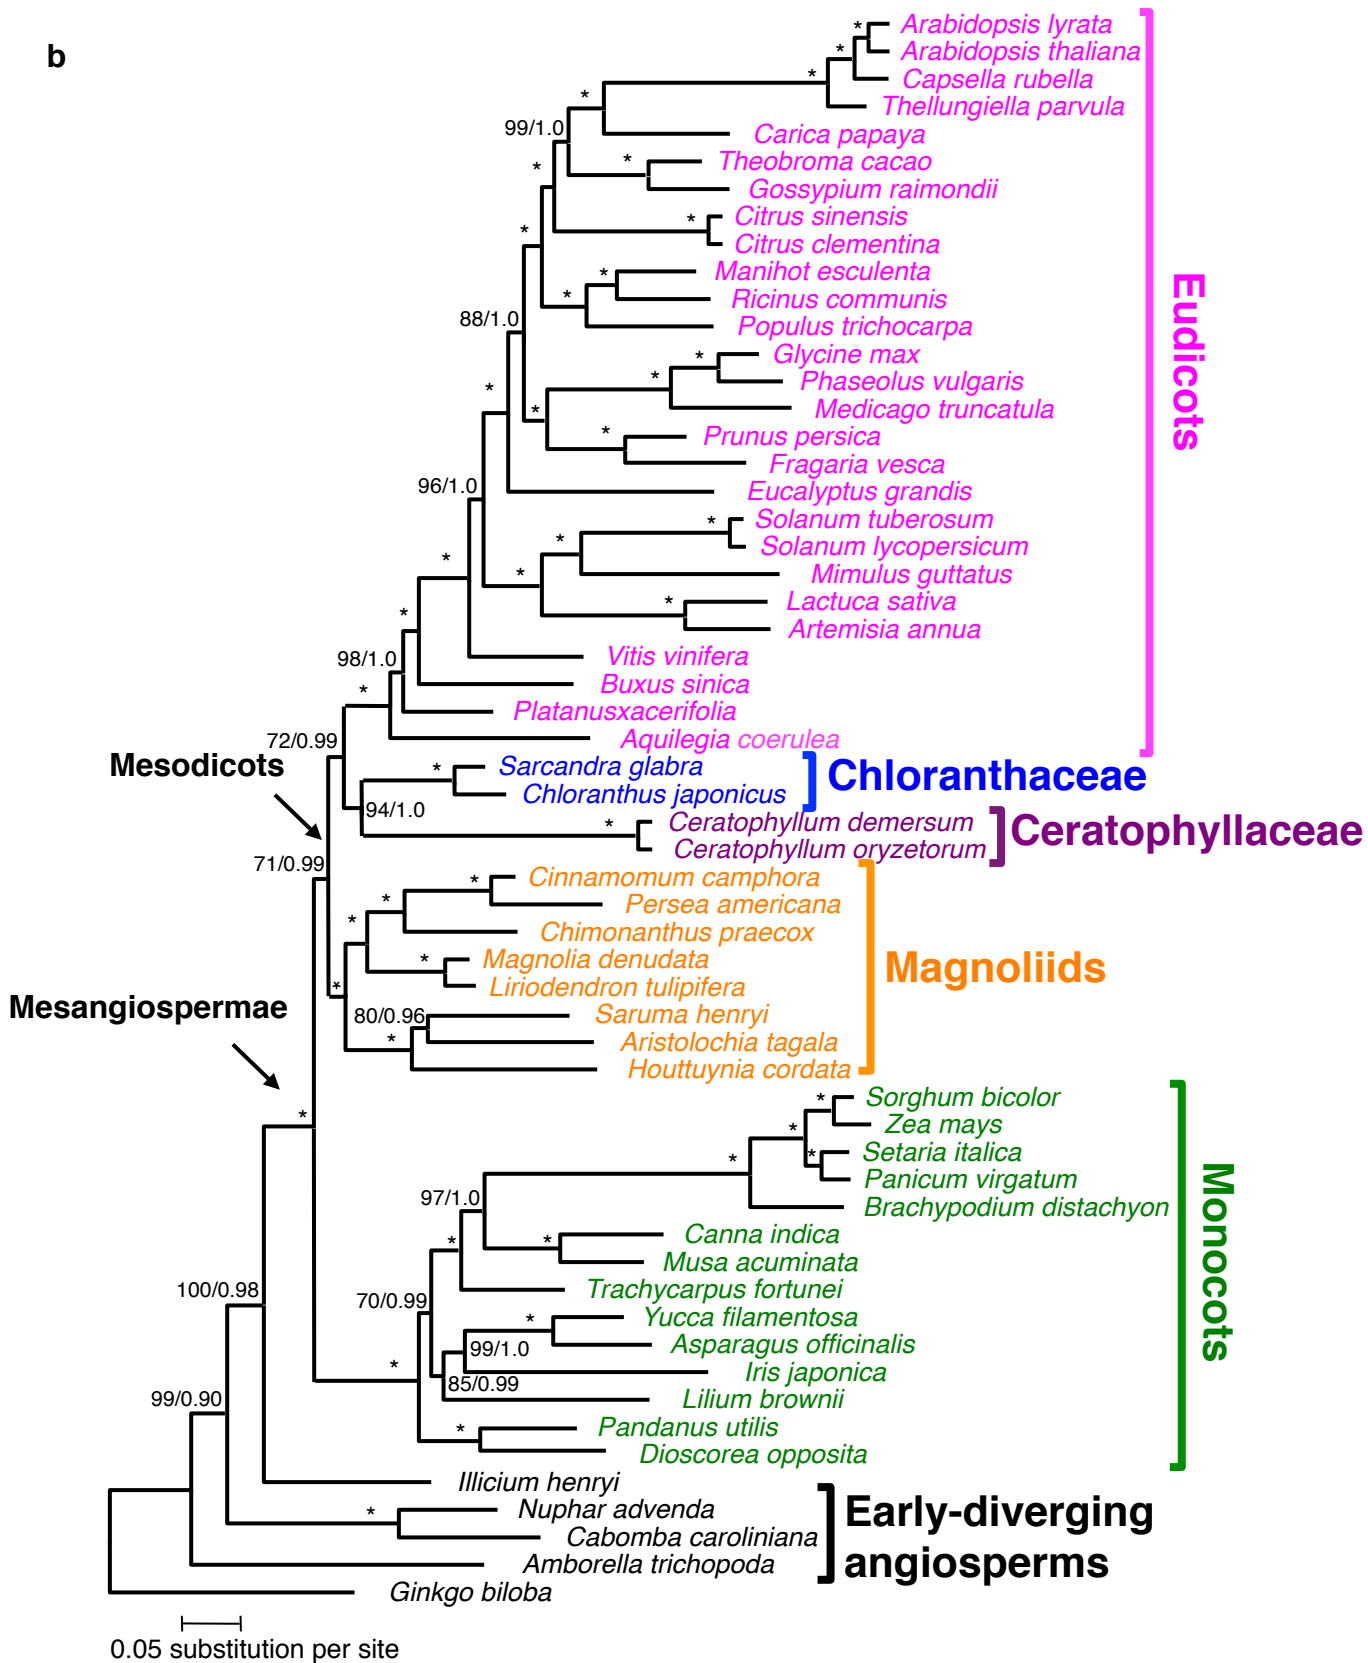

**Supplementary Fig. 13b. A phylogram of the best ML tree inferred using RAxML based on concatenated 59-gene amino acid sequences from 58 species . Three species from basal monocots (*Acorus calamus*, *Alisma plantago-aquatica*, and *Pinellia ternata*) were excluded in this analysis; numbers associated with branches are bootstrap values (BS) and posterior probability (PP) inferred by RAxML and MrBayes, respectively; an asterisk indicates BS of 100% and PP of 1.0 at the same time.**

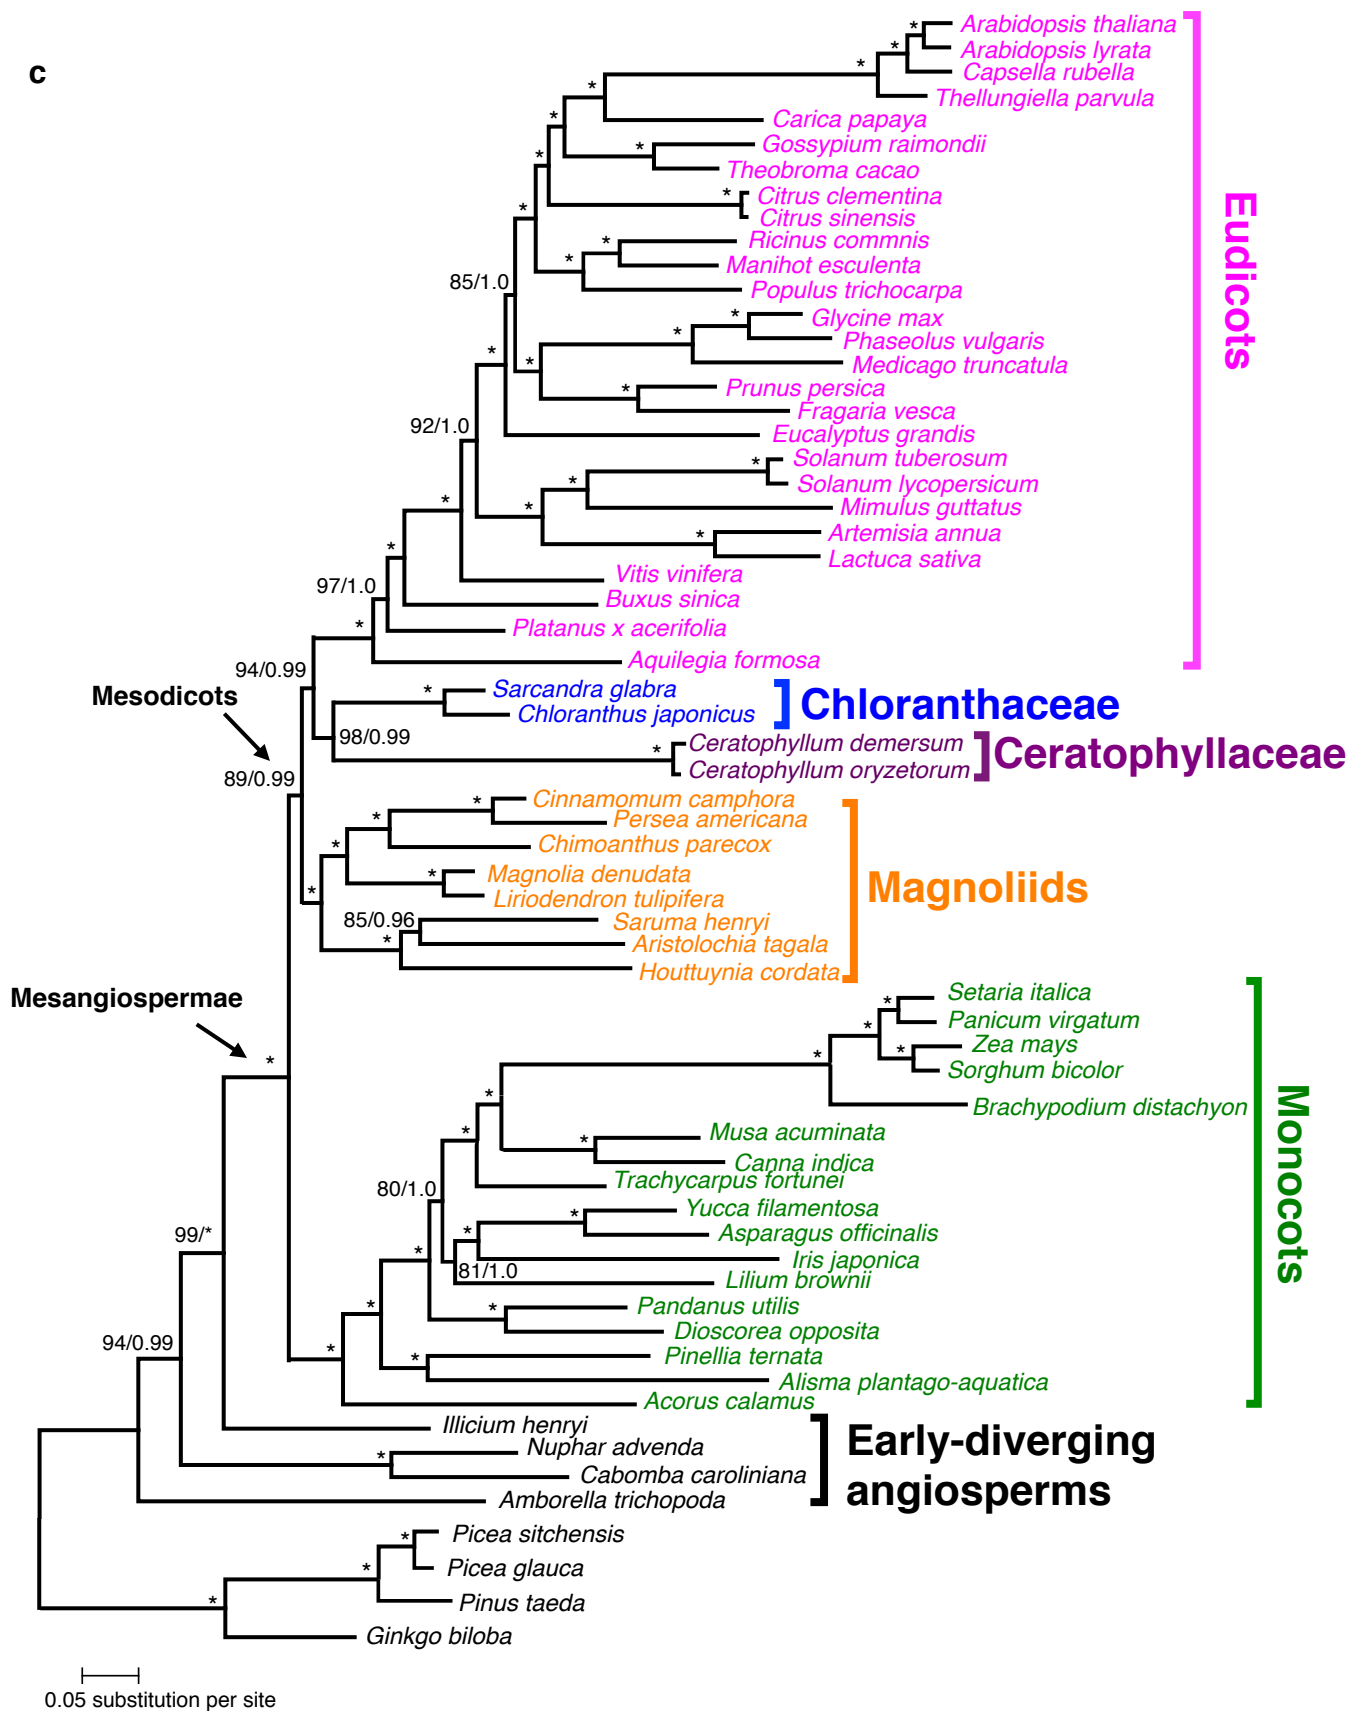

**Supplementary Fig. 13c. A phylogram of the best ML tree inferred using RAxML based on concatenated 59-gene amino acid sequences from 64 species. Three Pinaceae species (*Picea sitchensis*, *Picea glauca*, and *Pinus taeda*) were included in this analysis; numbers associated with branches are bootstrap values (BS) and posterior probability (PP) inferred by RAxML and MrBayes, respectively; an asterisk indicates BS of 100% and PP of 1.0 at the same time.**



d

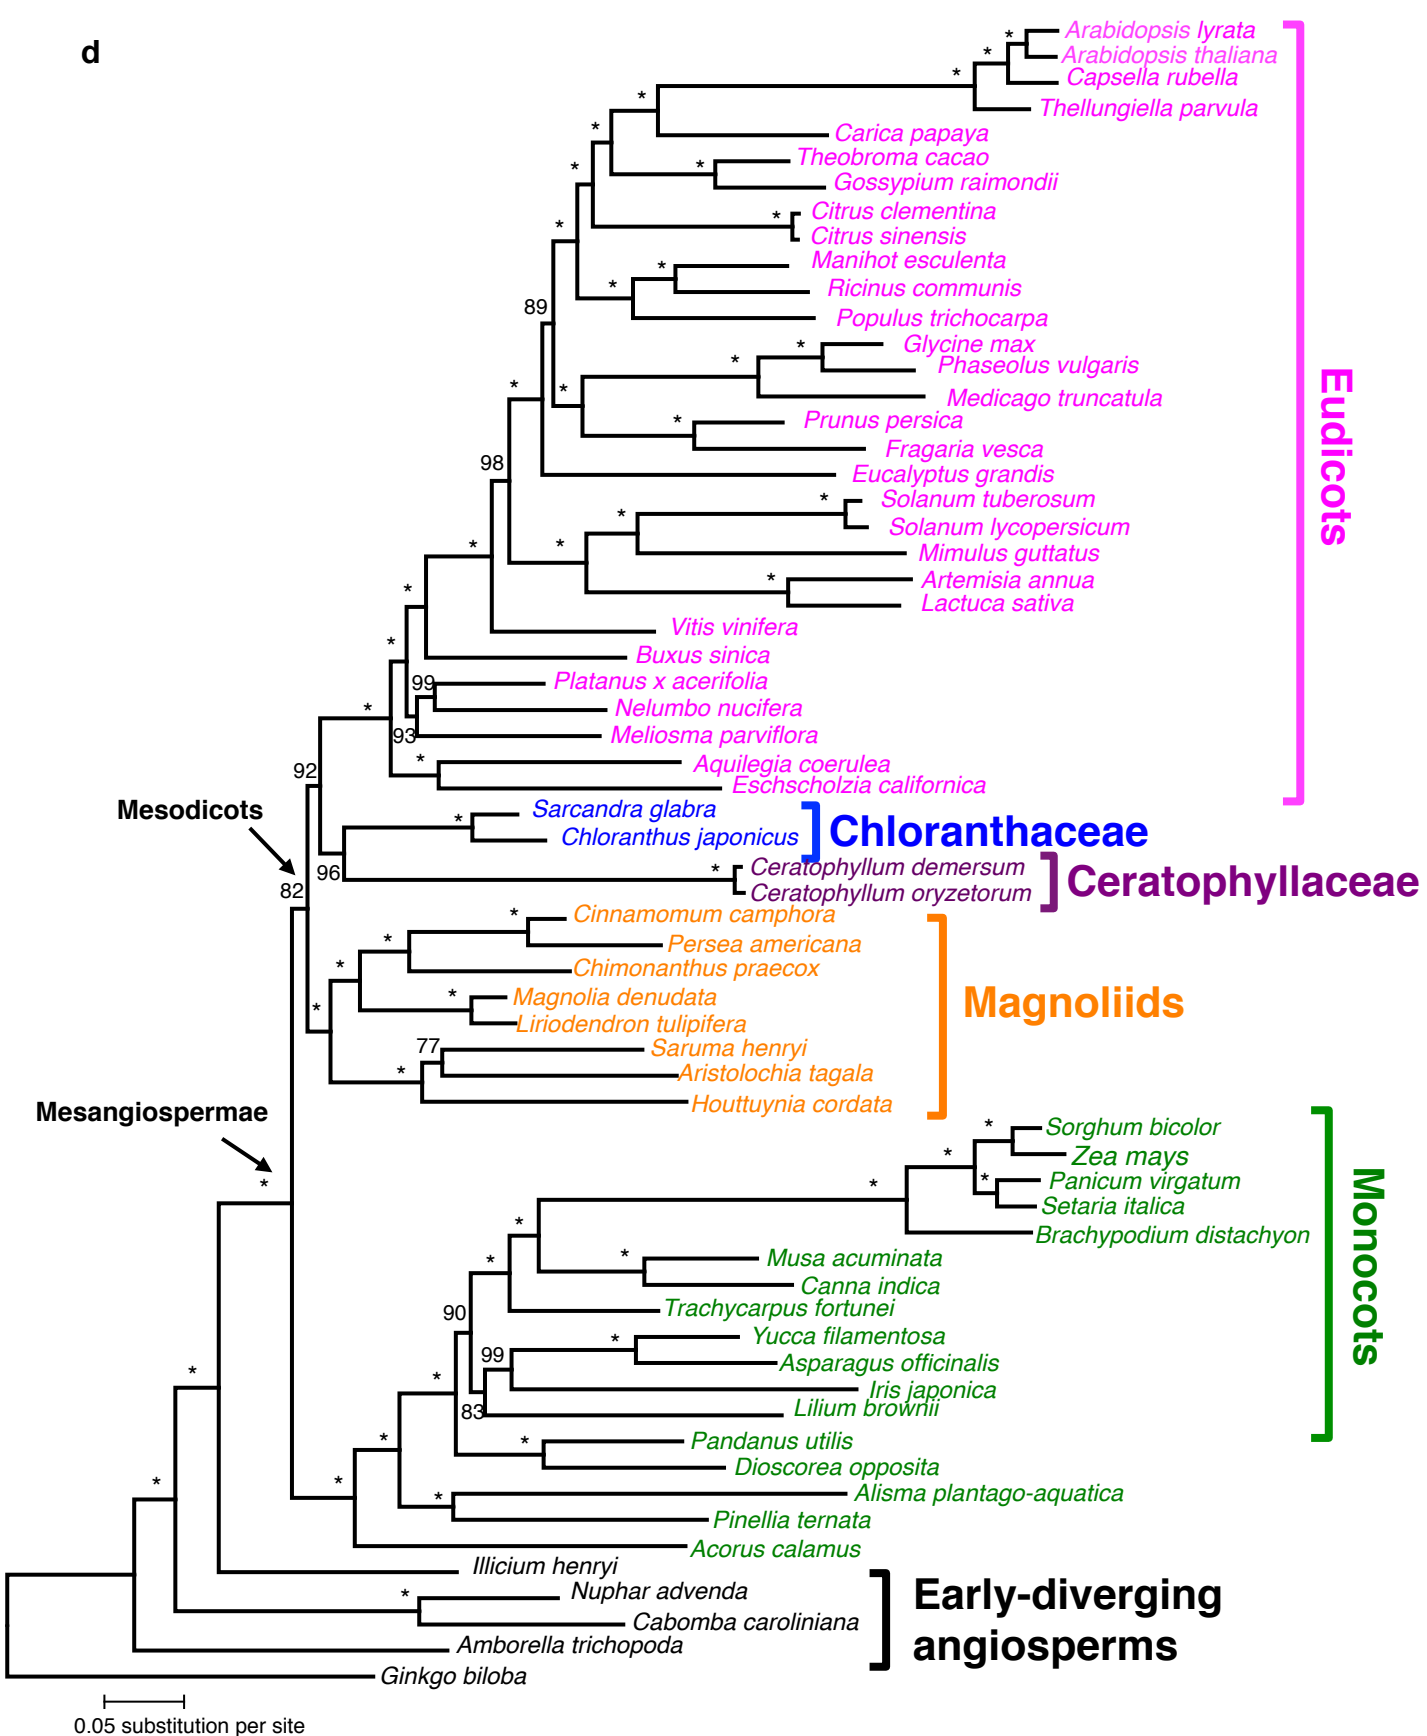

**Supplementary Fig. 13d.** An ML tree inferred by RAxML based on concatenated 59-gene amino acid sequences from 63 species. Three basal eudicot species (*Nelumbo nucifera*, *Meliosma parviflora* and *Eschscholzia californica*) were included in this analysis; numbers associated with branches are bootstrap values inferred by RAxML; an asterisk indicates BS of 100%.

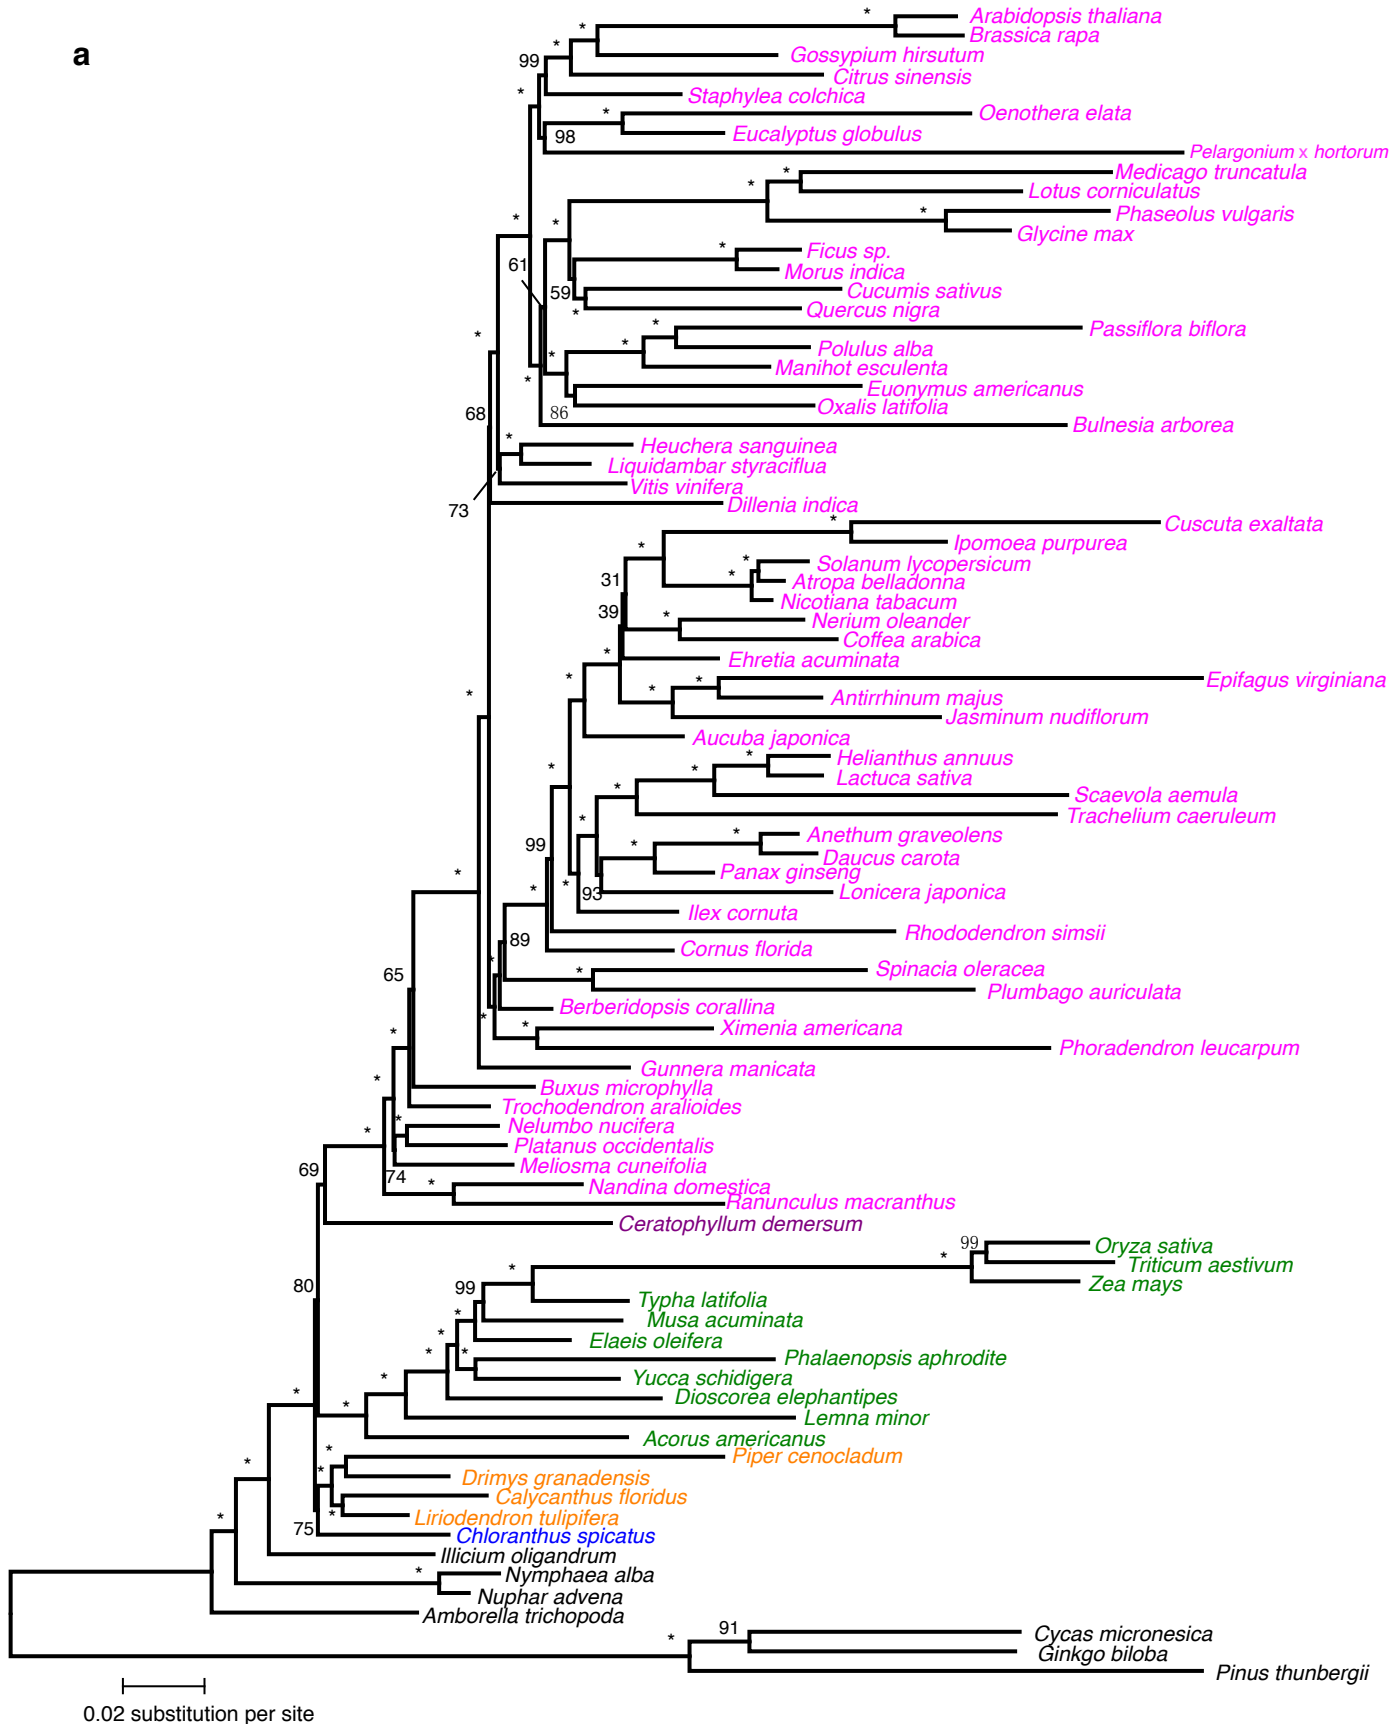

**Supplementary Fig. 14a.** The ML tree inferred by RAXML based on concatenated 83 plastid genes of 86 species. Numbers associated with branches are bootstrap values; an asterisk indicates bootstrap of 100%.

Species from eudicots, monocots, magnoliids, Chloranthaceae and Ceratophyllaceae are in purple, green, orange, violet and blue, respectively.

**b**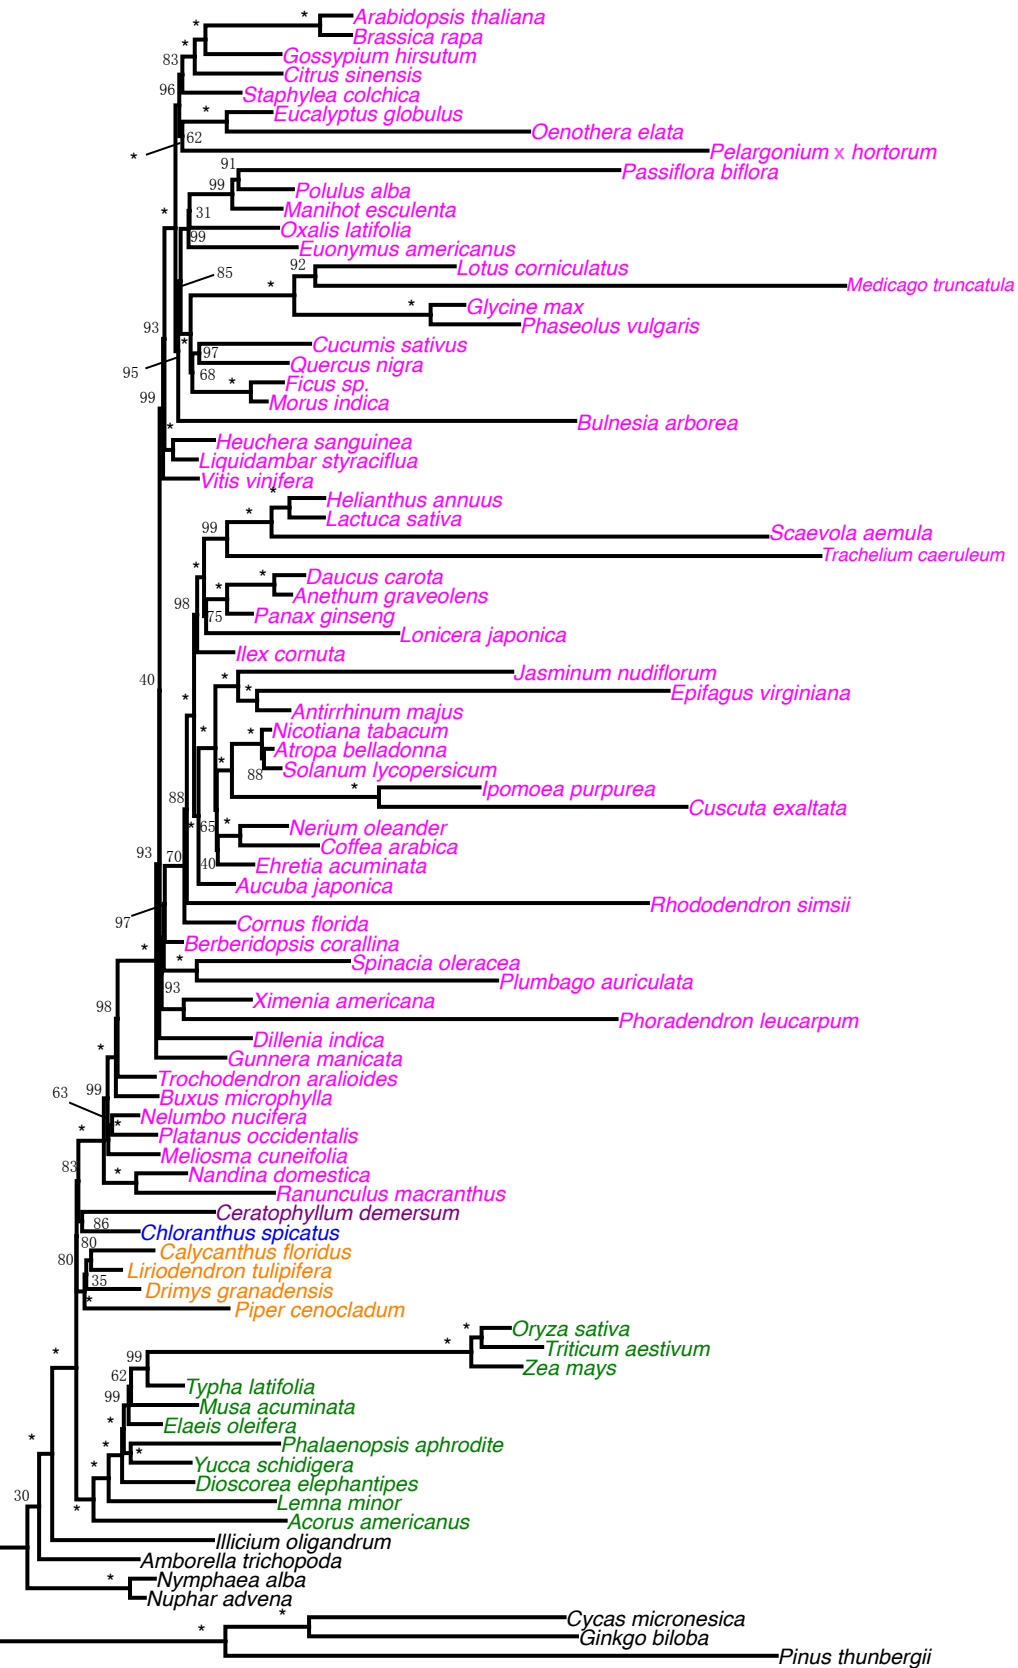

0.01 substitution per site

**Supplementary Fig. 14b. The ML tree inferred by RAxML based on 40 concatenated plastid inverted repeat genes of 86 species.** Numbers associated with branches are bootstrap values; an asterisk indicates bootstrap of 100%. Species from eudicots, monocots, magnoliids, Chloranthaceae and Ceratophyllaceae are in purple, green, orange, violet and blue, respectively.

**C**

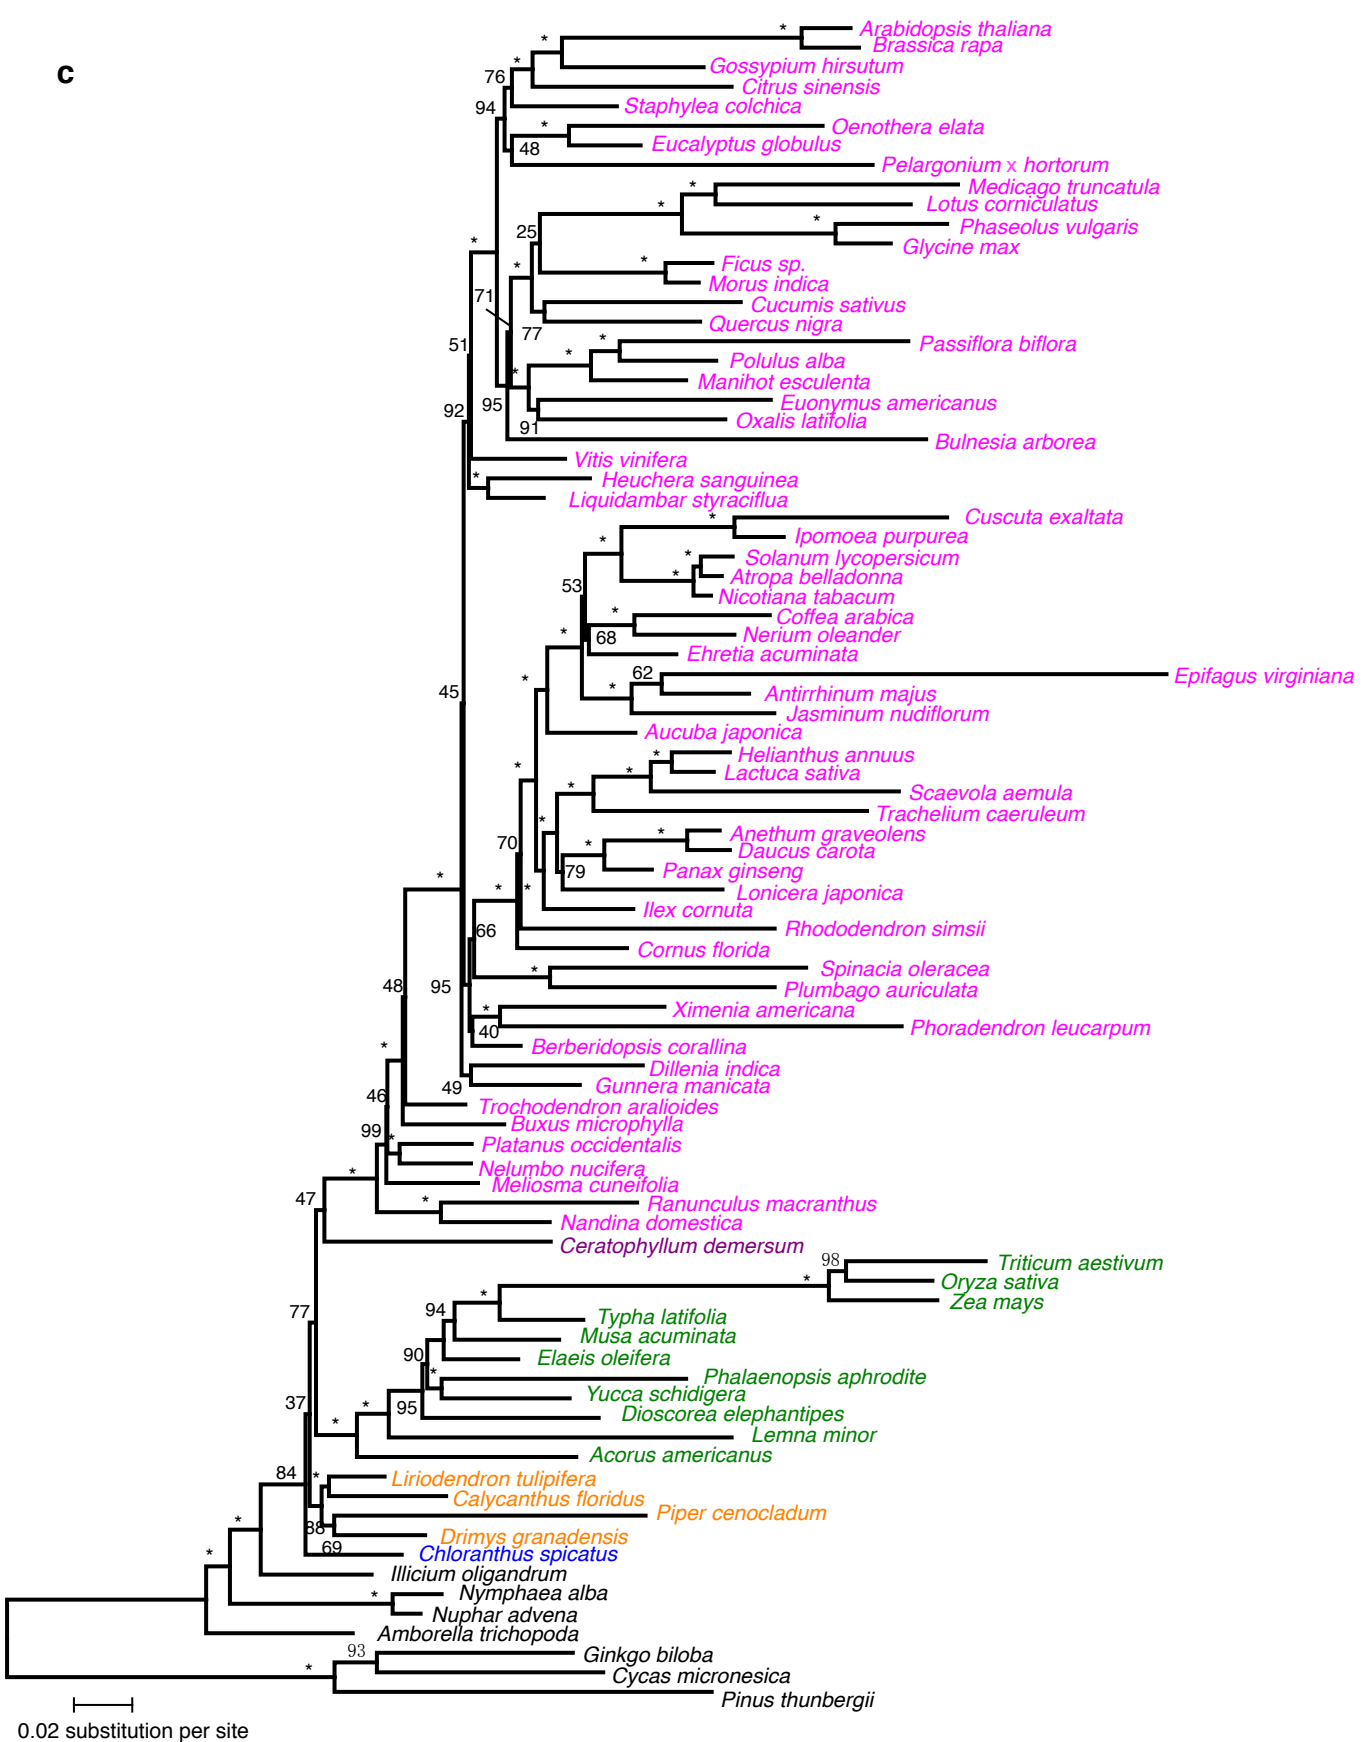

**Supplementary Fig. 14c.** The ML tree inferred by RAxML based on concatenated 34 plastid genes of 86 species with percentage of parsimony informative sites less than 40%. Numbers associated with branches are bootstrap values; an asterisk indicates bootstrap of 100%. Species from eudicots, monocots, magnoliids, Chloranthaceae and Ceratophyllaceae are in purple, green, orange, violet and blue, respectively.

**d**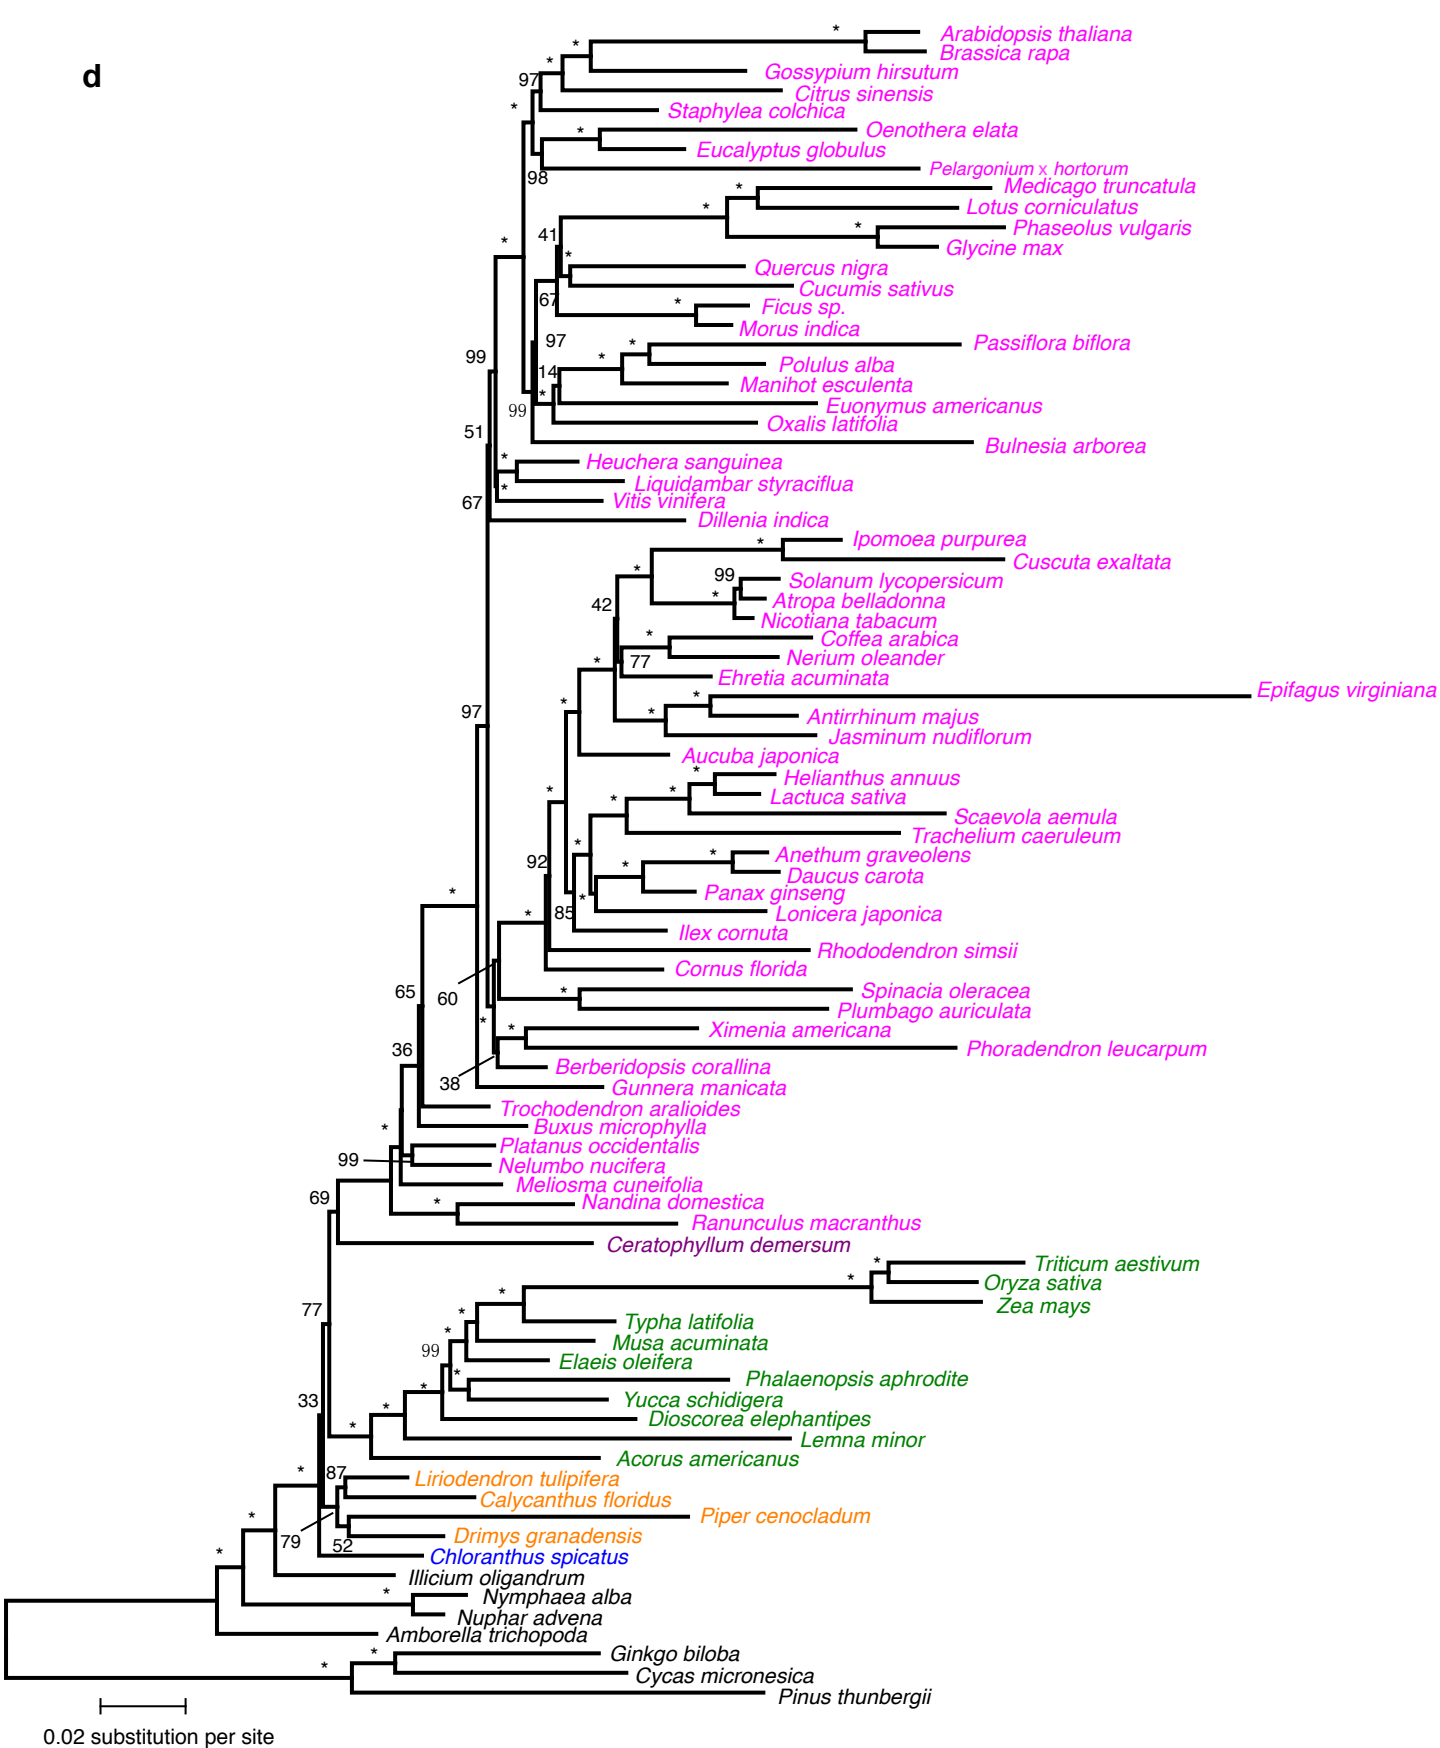

**Supplementary Fig. 14d.** The ML tree inferred by RAXML based on concatenated 46 plastid genes of 86 species with percentage of parsimony informative sites less than 50%. Numbers associated with branches are bootstrap values; an asterisk indicates bootstrap of 100%. Species from eudicots, monocots, magnoliids, Chloranthaceae and Ceratophyllaceae are in purple, green, orange, violet and blue, respectively.

e

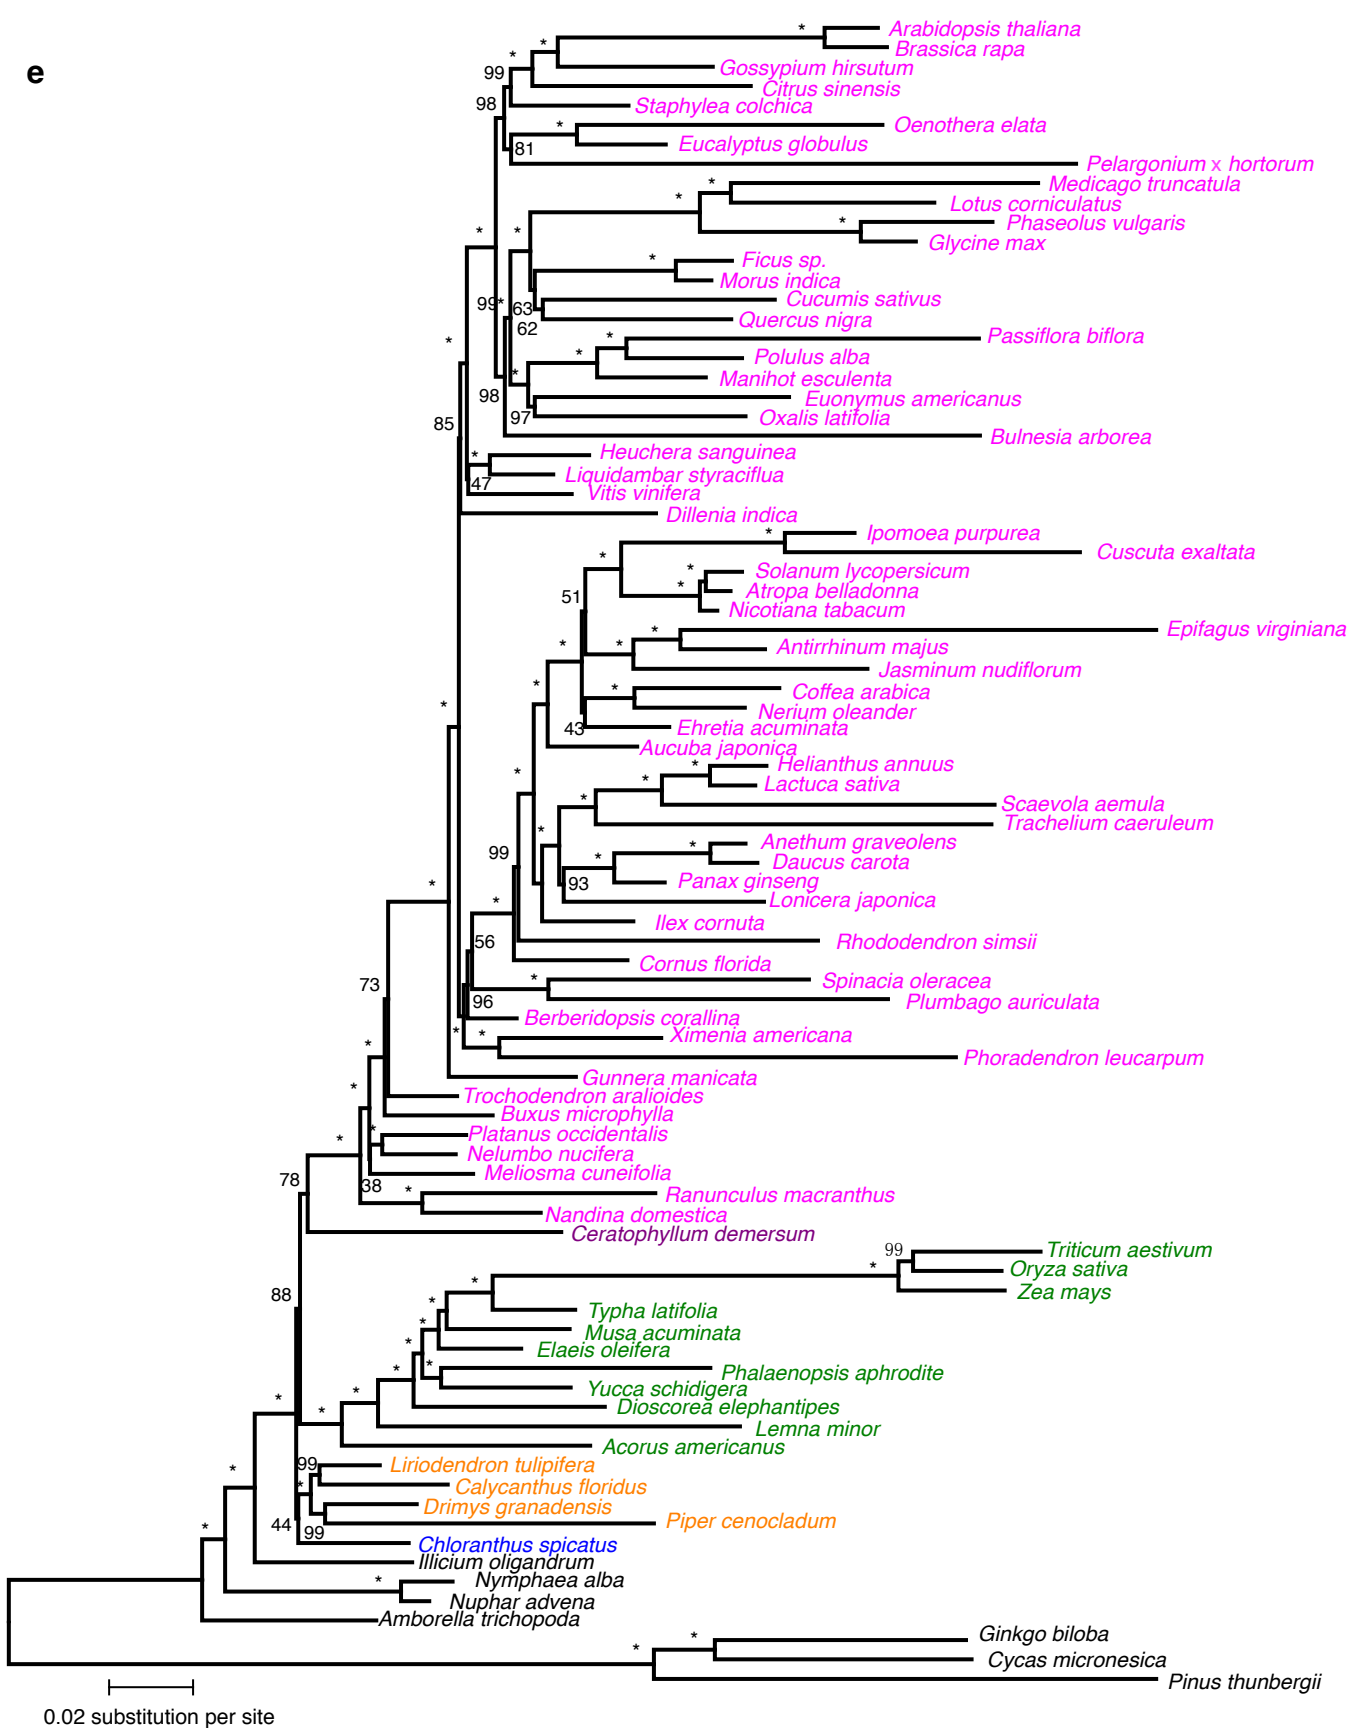

**Supplementary Fig. 14e.** The ML tree inferred by RAxML based on concatenated 66 plastid genes of 86 species with percentage of parsimony informative sites less than 60%. Numbers associated with branches are bootstrap values; an asterisk indicates bootstrap of 100%. Species from eudicots, monocots, magnoliids, Chloranthaceae and Ceratophyllaceae are in purple, green, orange, violet and blue, respectively.

f

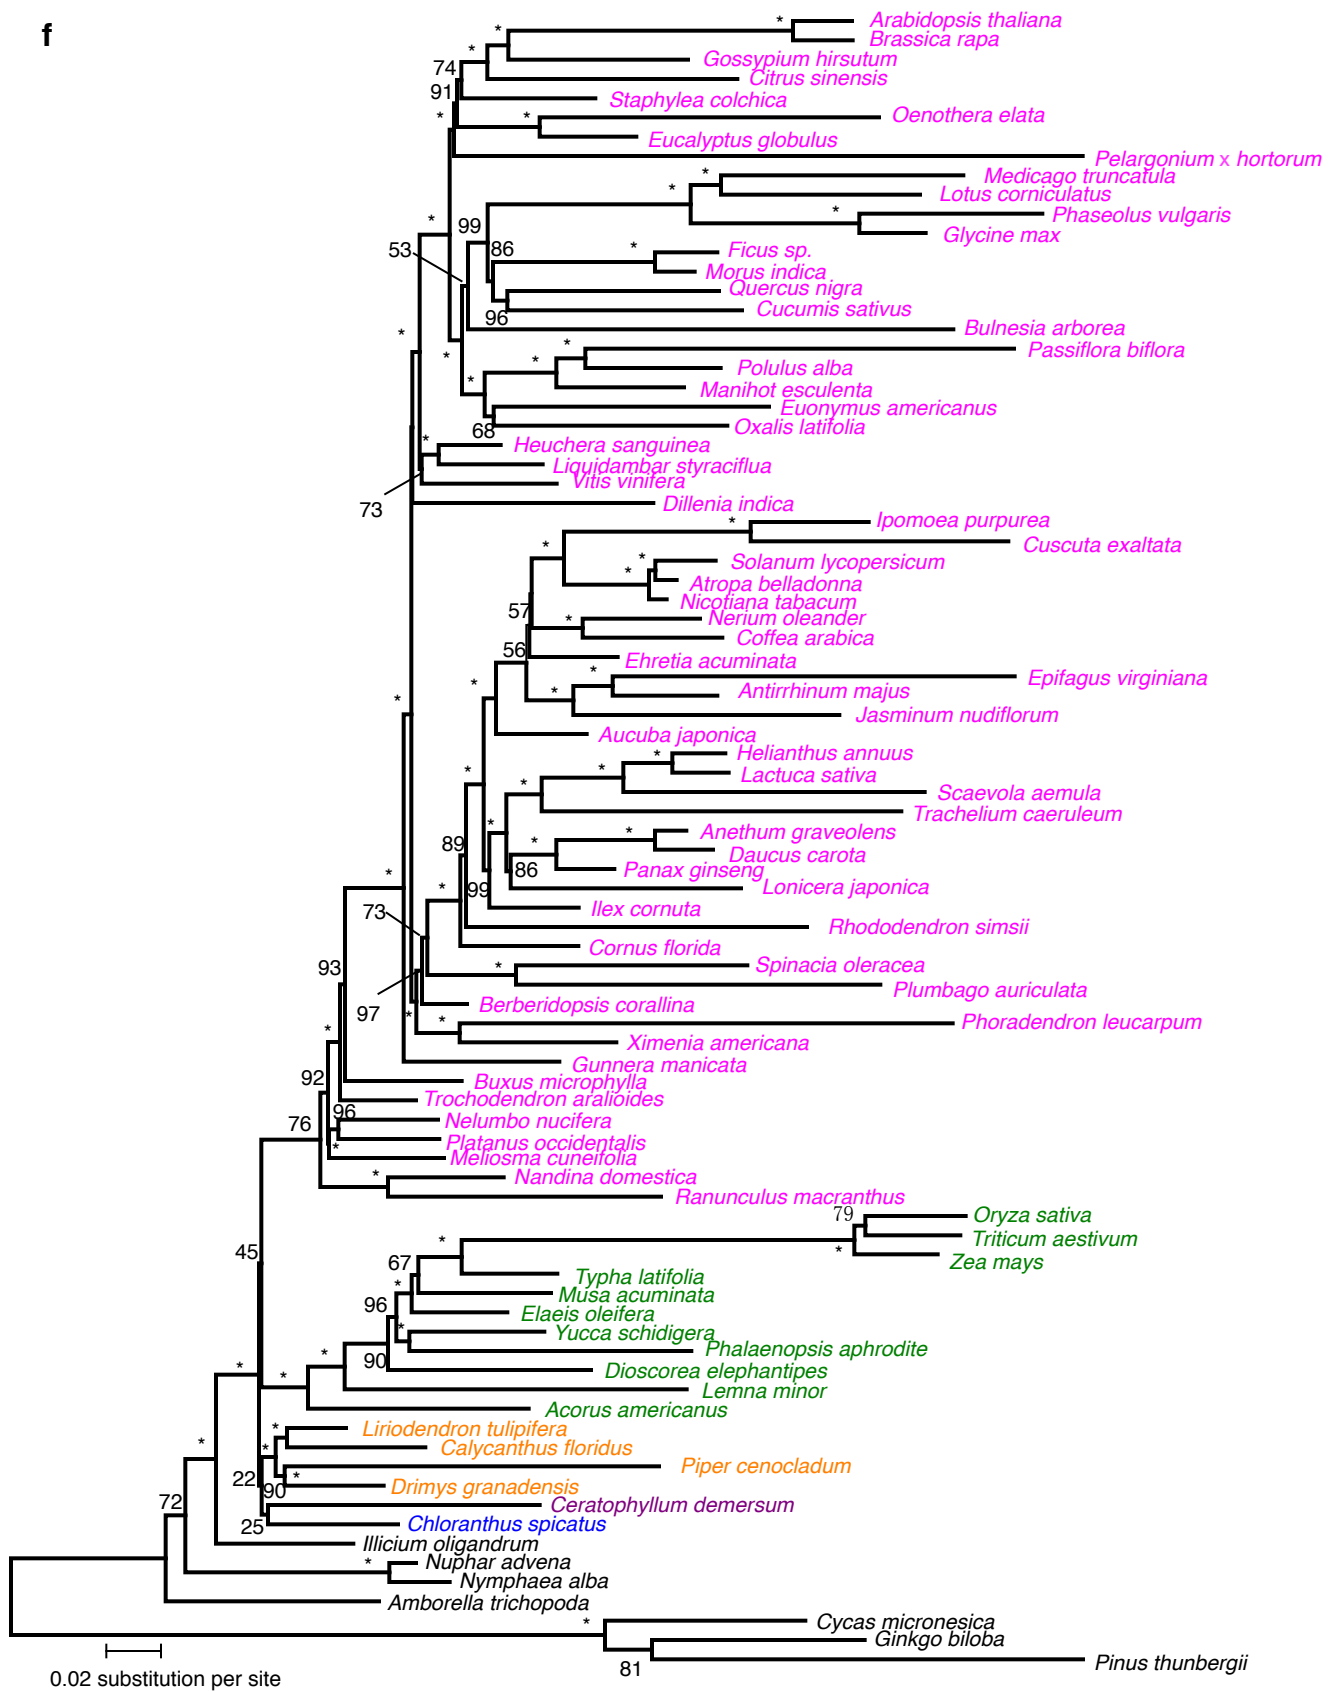

**Supplementary Fig. 14f.** The ML tree inferred by RAxML based on concatenated 17 plastid genes of 86 species with percentage of parsimony informative sites greater than 60%. Numbers associated with branches are bootstrap values; an asterisk indicates bootstrap of 100%. Species from eudicots, monocots, magnoliids, Chloranthaceae and Ceratophyllaceae are in purple, green, orange, violet and blue, respectively.

g

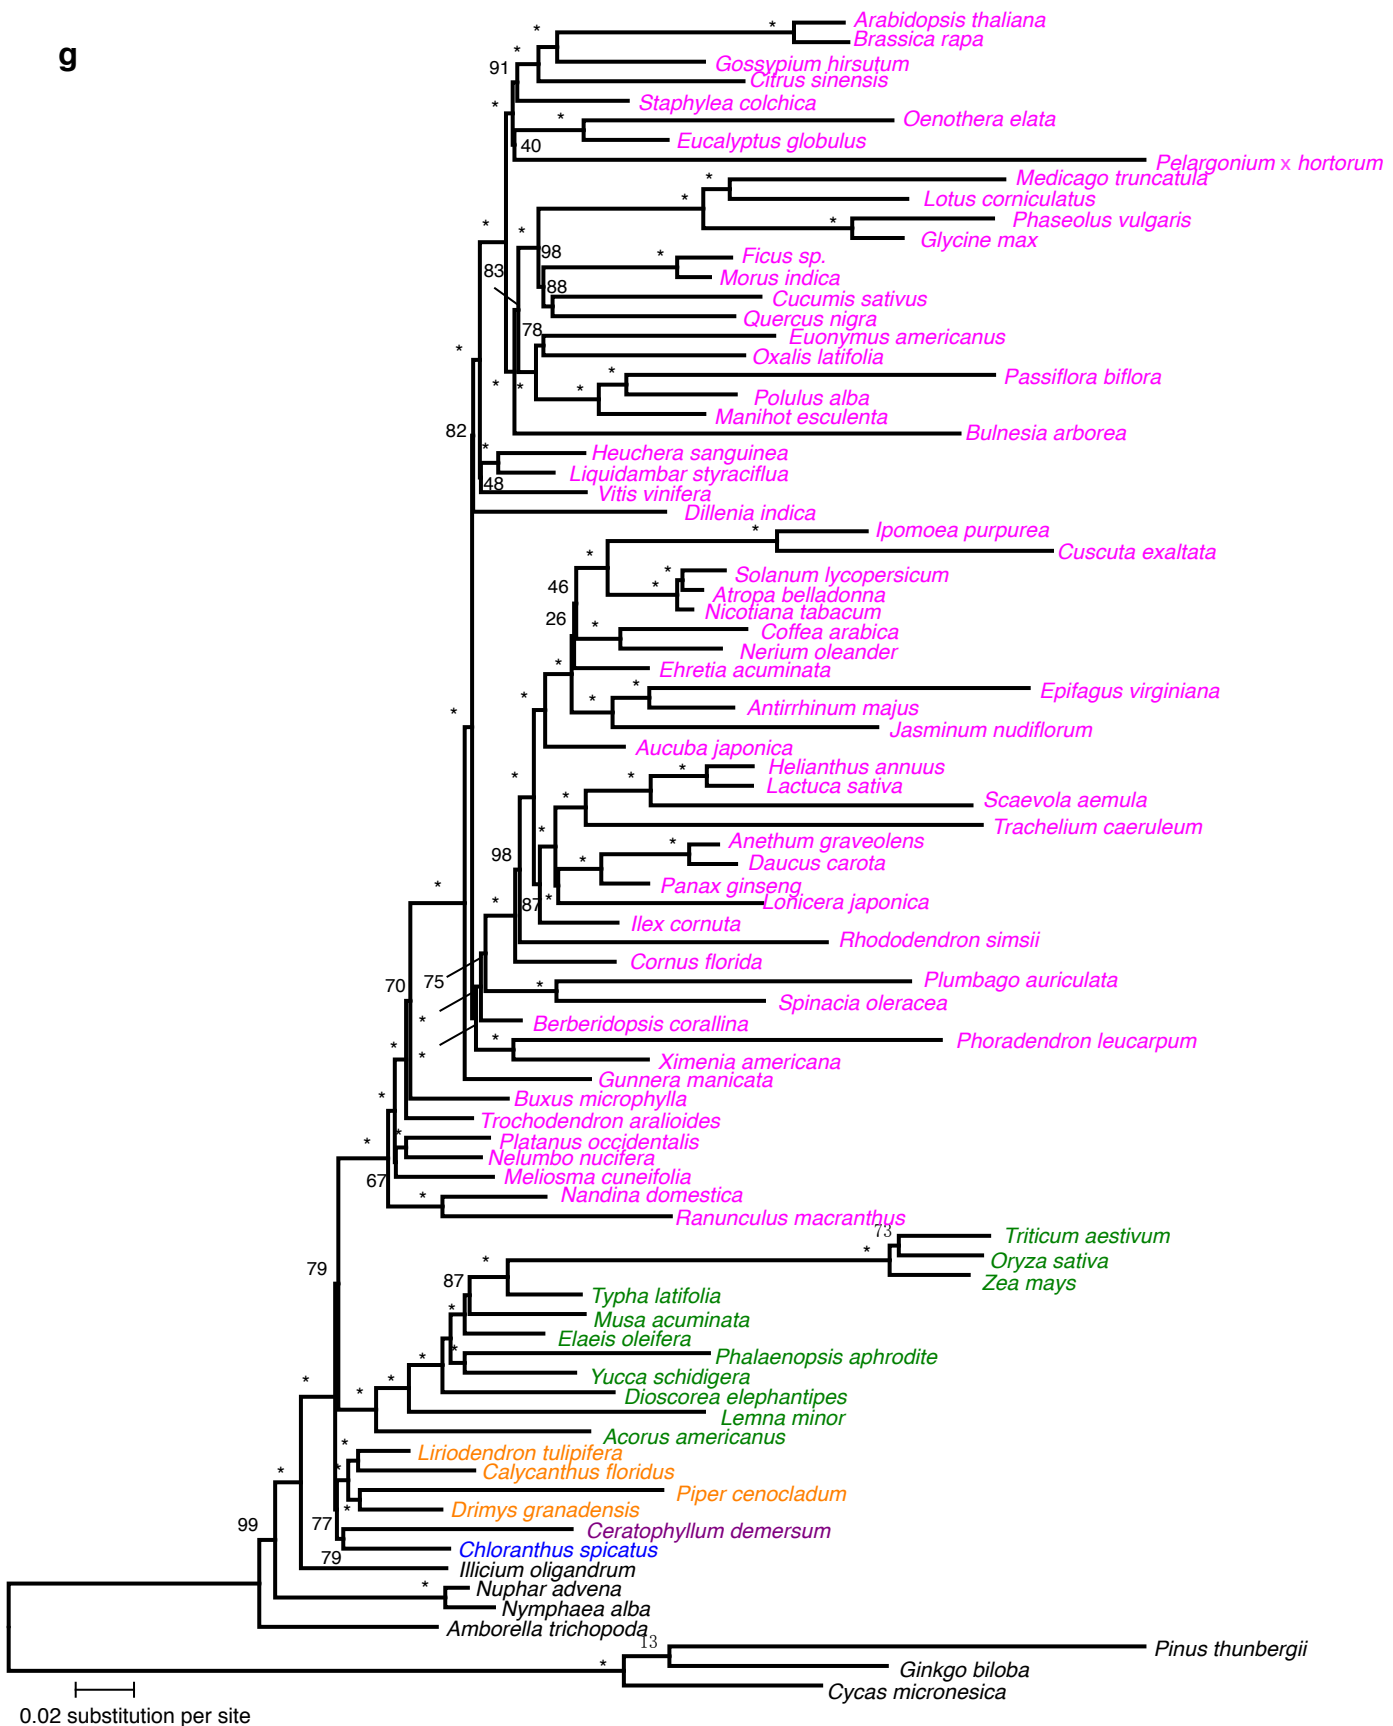

**Supplementary Fig. 14g.** The ML tree inferred by RAxML based on concatenated 37 plastid genes of 86 species with percentage of parsimony informative sites greater than 50%. Numbers associated with branches are bootstrap values; an asterisk indicates bootstrap of 100%. Species from eudicots, monocots, magnoliids, Chloranthaceae and Ceratophyllaceae are in purple, green, orange, violet and blue, respectively.



h

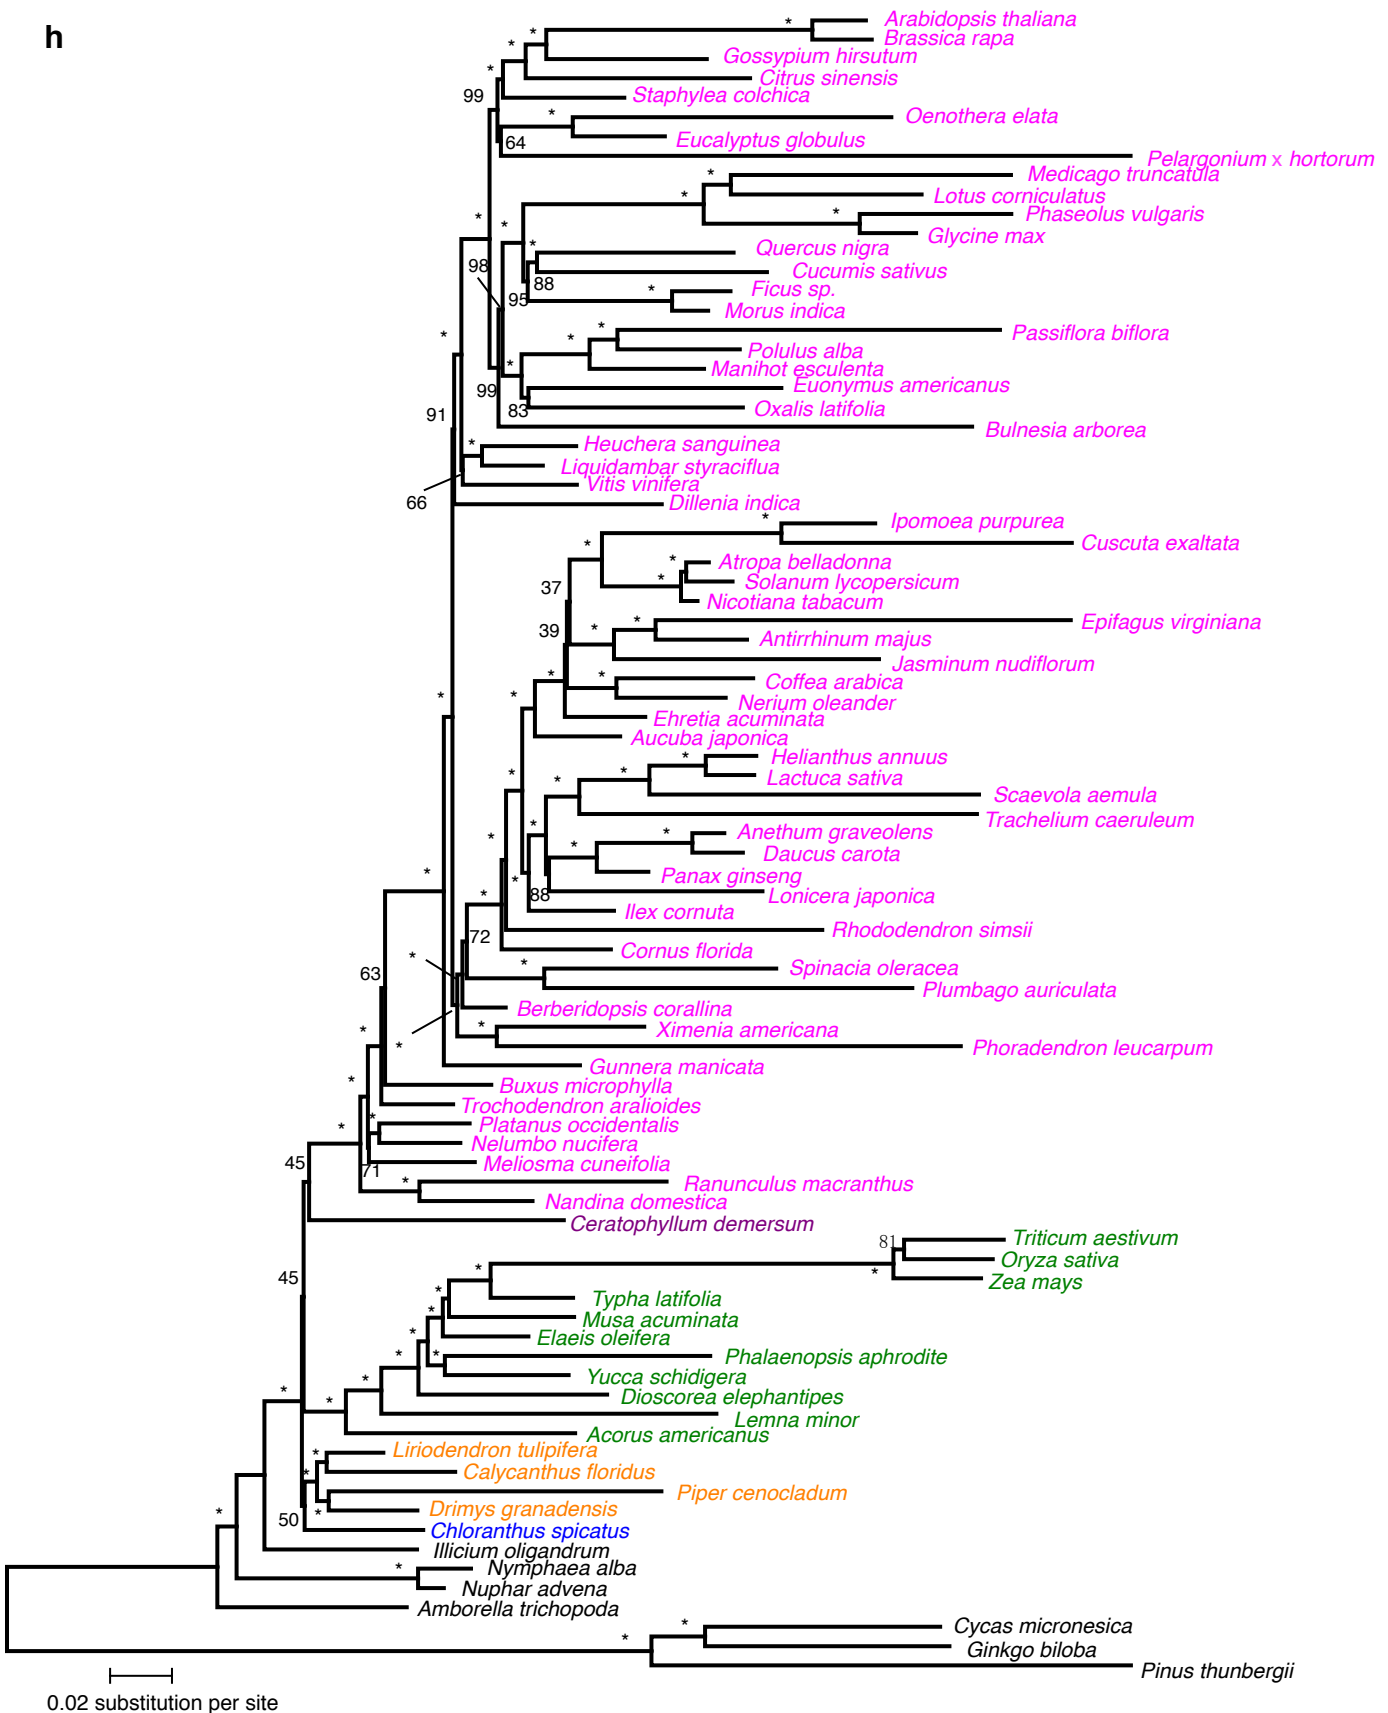

**Supplementary Fig. 14h.** The ML tree inferred by RAxML based on concatenated 49 plastid genes of 86 species with percentage of parsimony informative sites greater than 40%. Numbers associated with branches are bootstrap values; an asterisk indicates bootstrap of 100%. Species from eudicots, monocots, magnoliids, Chloranthaceae and Ceratophyllaceae are in purple, green, orange, violet and blue, respectively.

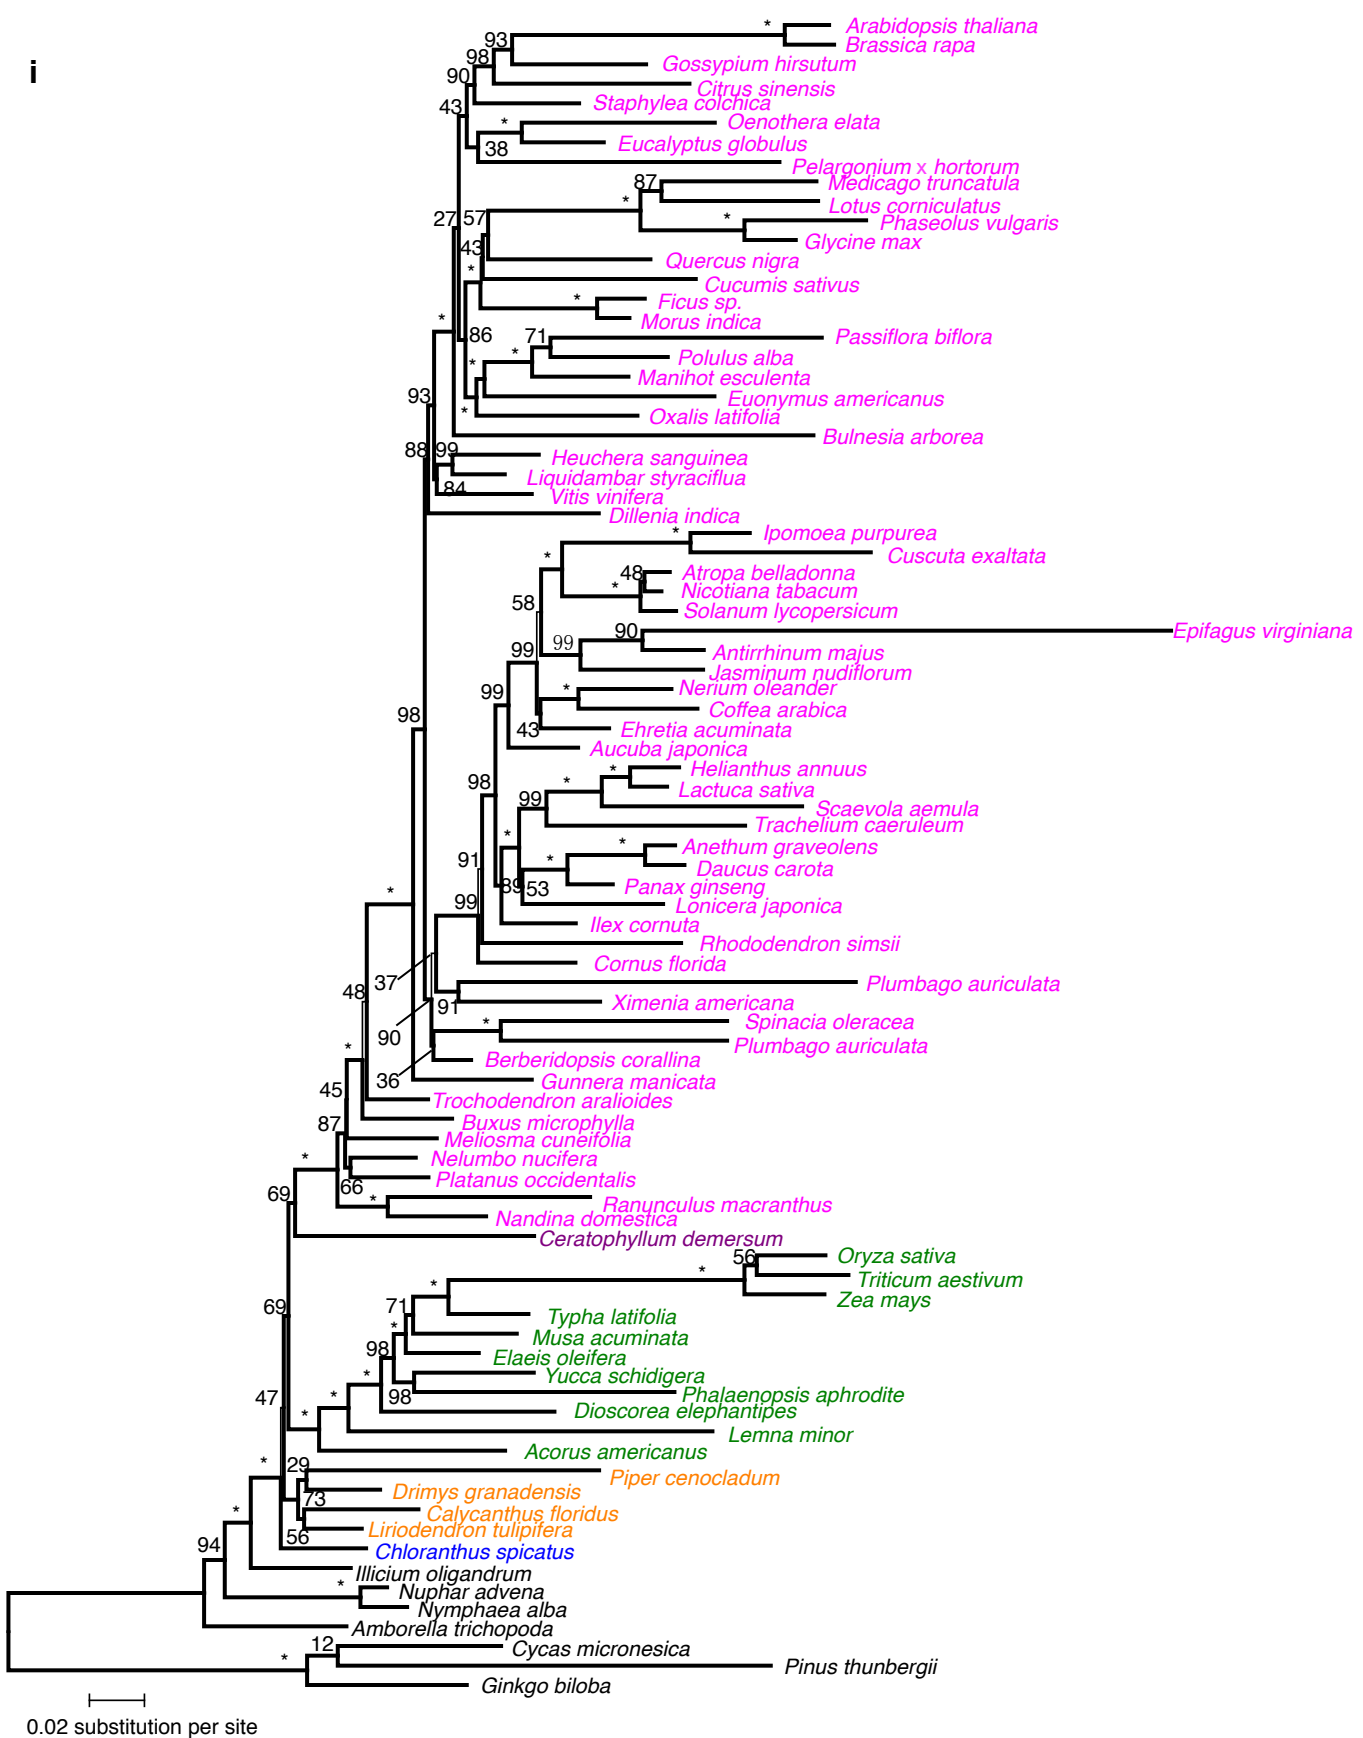

**Supplementary Fig. 14i.** The ML tree inferred by RAxML based on concatenated 13 plastid genes of 86 species with percentage of parsimony informative sites ranging from 40% to 50%. Numbers associated with branches are bootstrap values; an asterisk indicates bootstrap of 100%. Species from eudicots, monocots, magnoliids, Chloranthaceae and Ceratophyllaceae are in purple, green, orange, violet and blue, respectively.

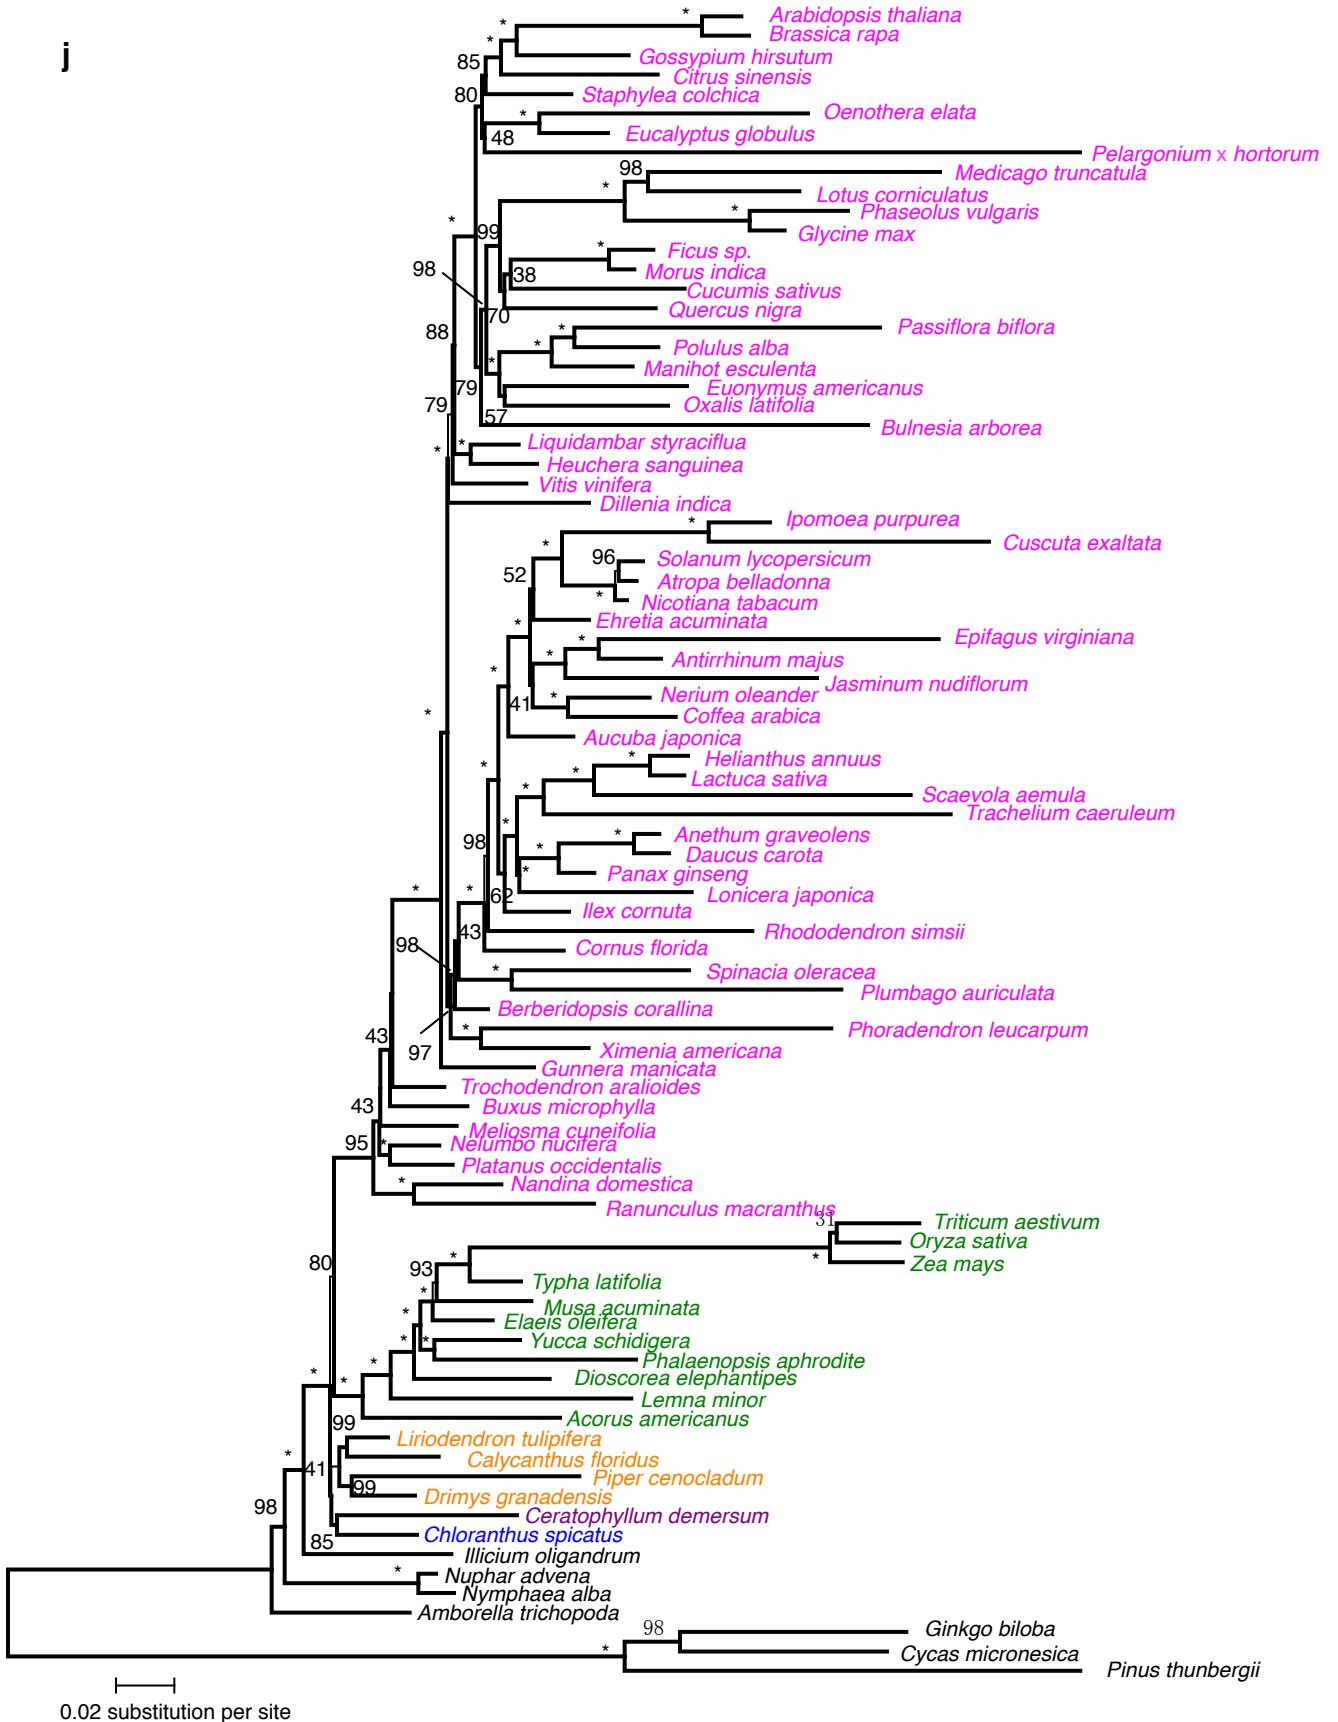

**Supplementary Fig. 14j.** The ML tree inferred by RAxML based on concatenated 20 plastid genes of 86 species with percentage of parsimony informative sites ranging from 50% to 60%. Numbers associated with branches are bootstrap values; an asterisk indicates bootstrap of 100%. Species from eudicots, monocots, magnoliids, Chloranthaceae and Ceratophyllaceae are in purple, green, orange, violet and blue, respectively.

k

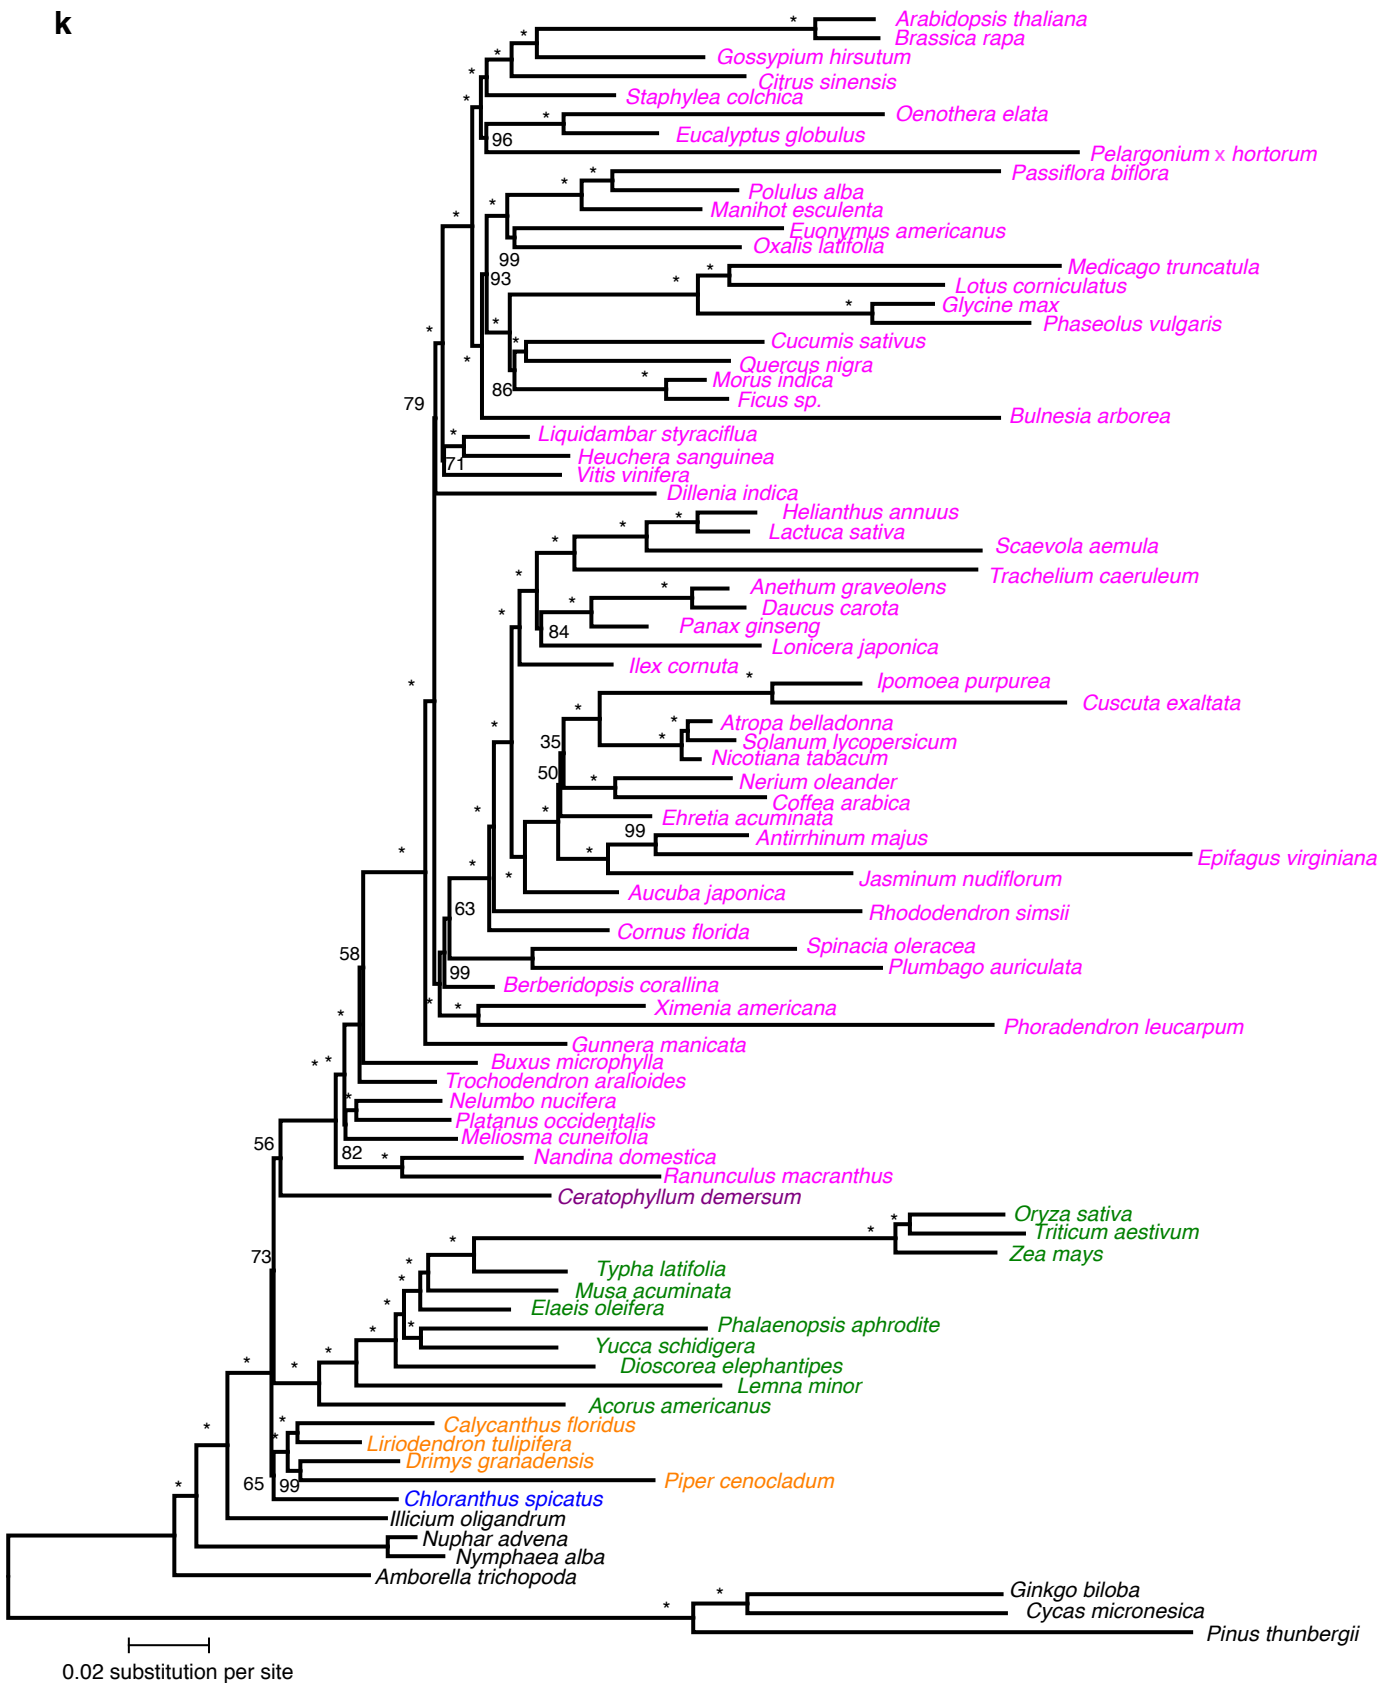

**Supplementary Fig. 14k.** The ML tree inferred by RAxML based on concatenated 112 plastid genes of 86 species. Numbers associated with branches are bootstrap values; an asterisk indicates bootstrap of 100%. Species from eudicots, monocots, magnoliids, Chloranthaceae and Ceratophyllaceae are in purple, green, orange, violet and blue, respectively.

a

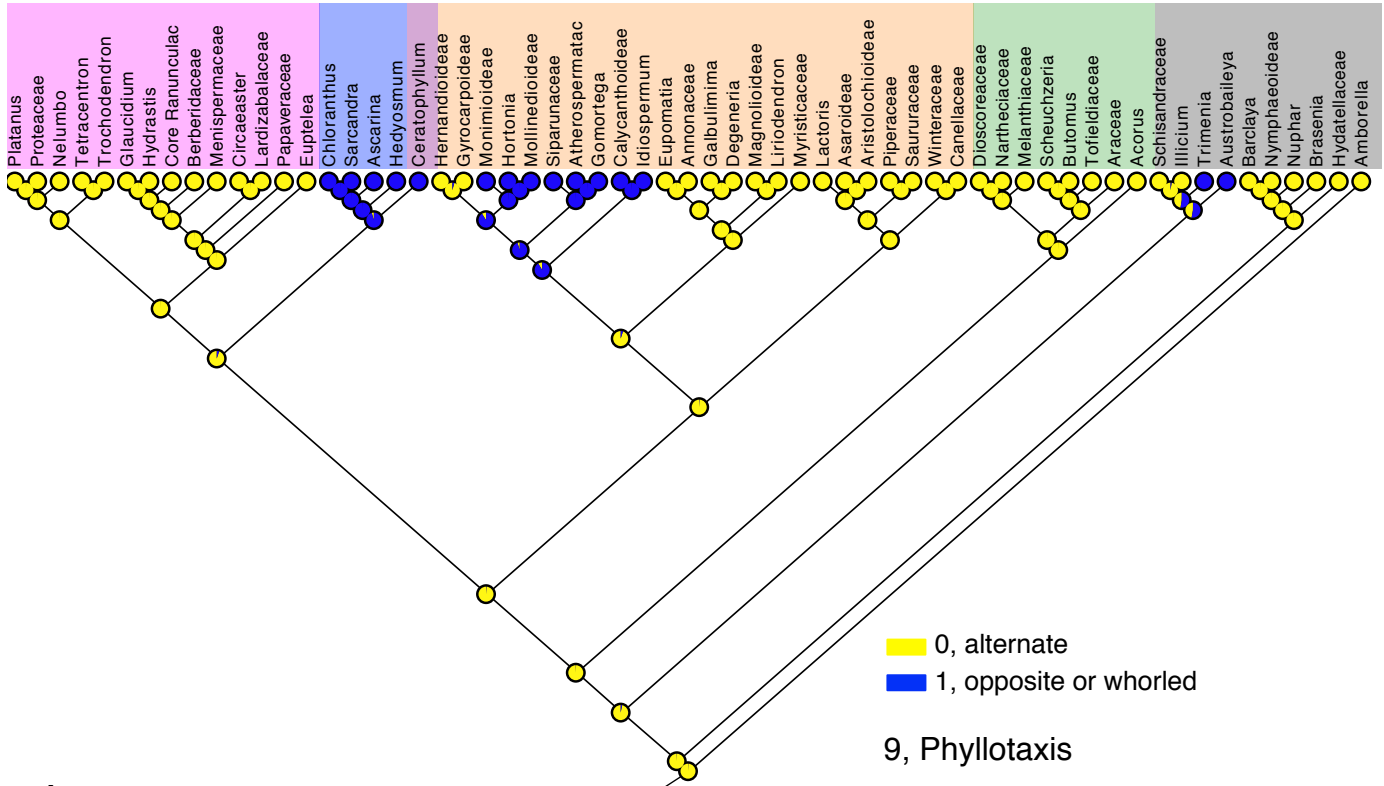

b

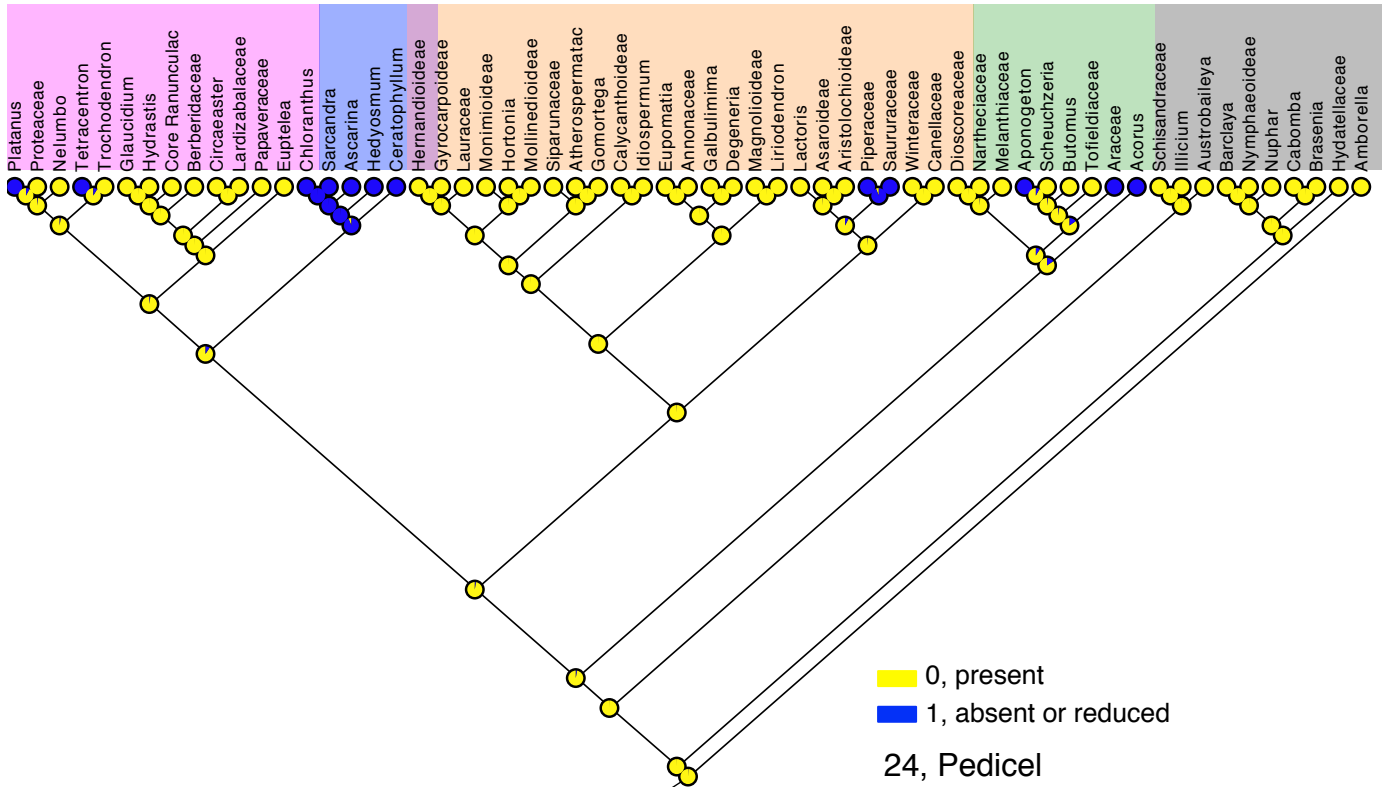

**Supplementary Fig. 15 (a-b). Six new morphological characters originated before the diversification of Chloranthaceae and Ceratophyllaceae. Eudicots, Chloranthaceae, Ceratophyllaceae, magnoliids, monocots and basal angiosperms are highlighted by pink, blue, dark purple, orange, green and gray, respectively.**

c

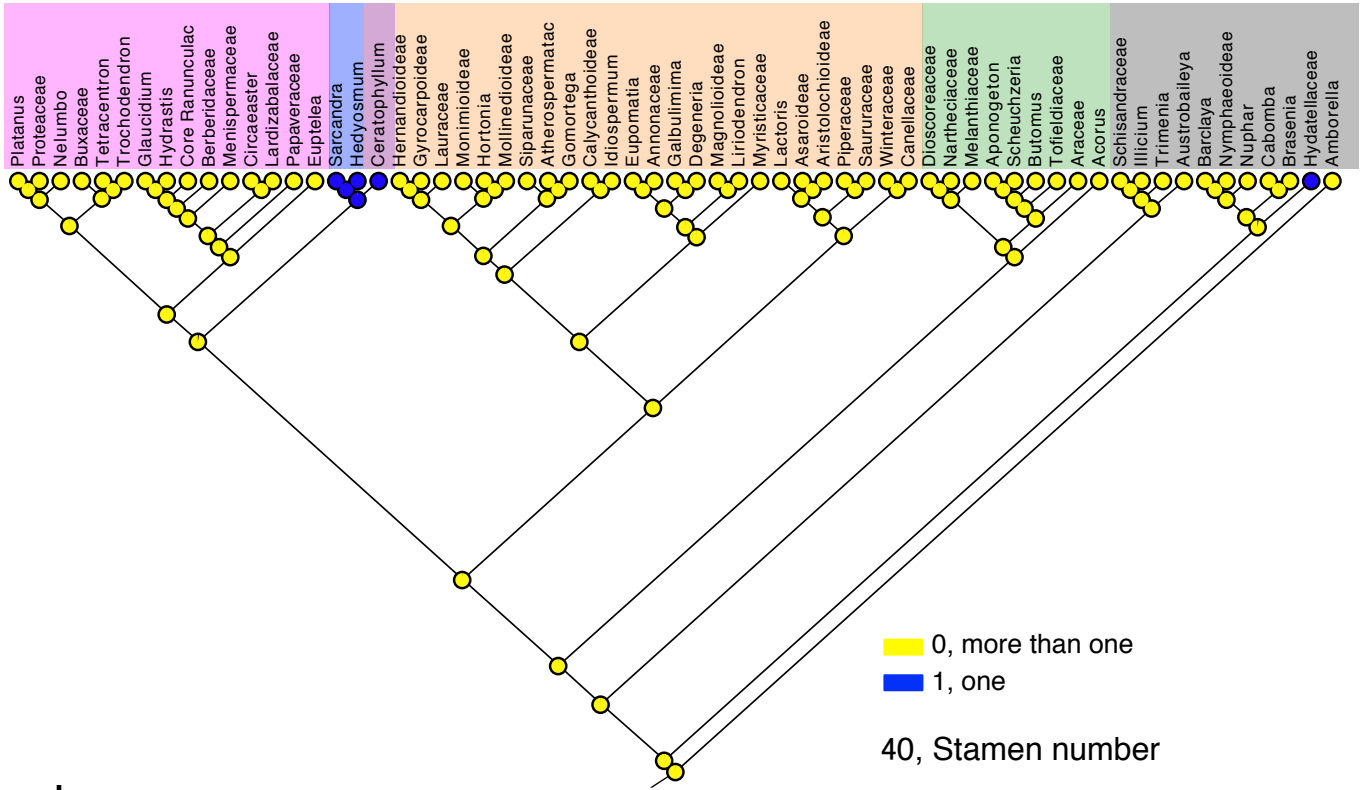

d

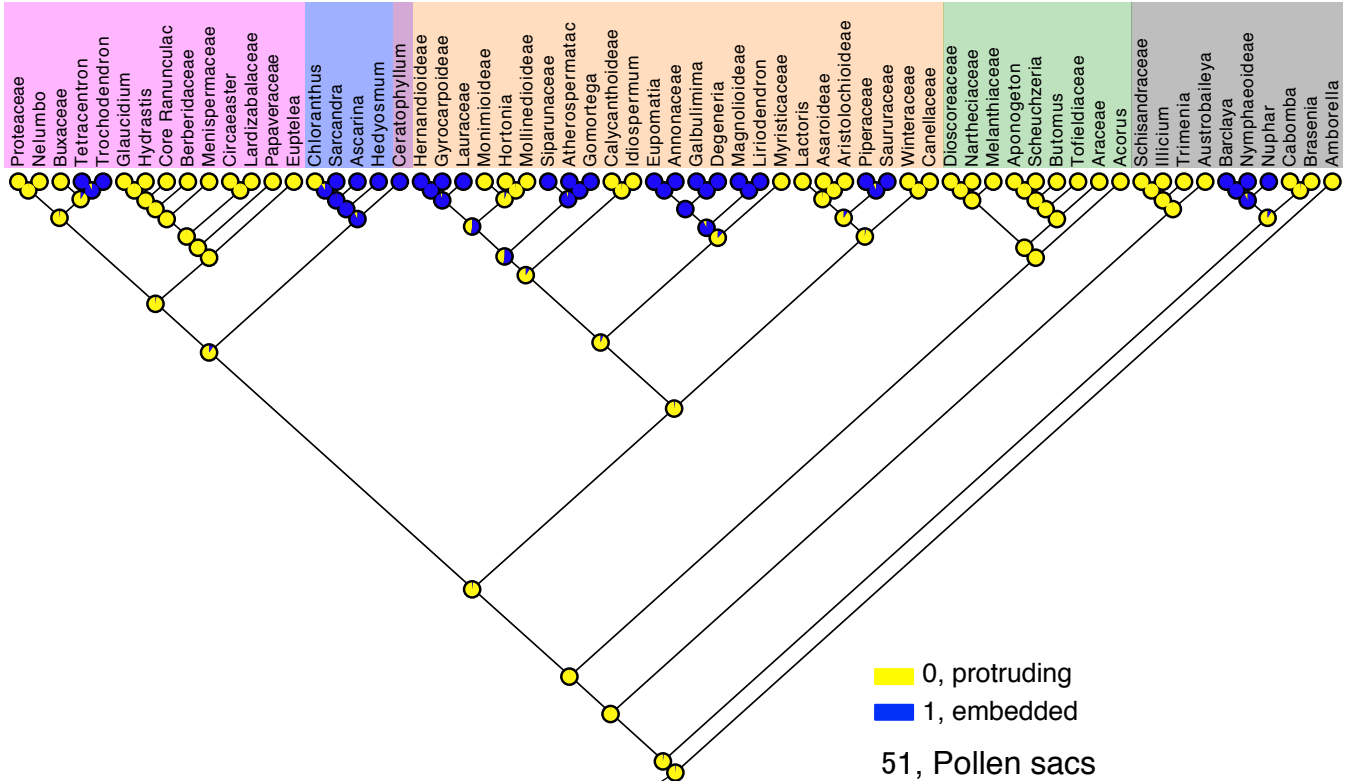

**Supplementary Fig. 15 (c-d). Six new morphological characters originated before the diversification of Chloranthaceae and Ceratophyllaceae.** Eudicots, Chloranthaceae, Ceratophyllaceae, magnoliids, monocots and basal angiosperms are highlighted by pink, blue, dark purple, orange, green and gray, respectively.

e

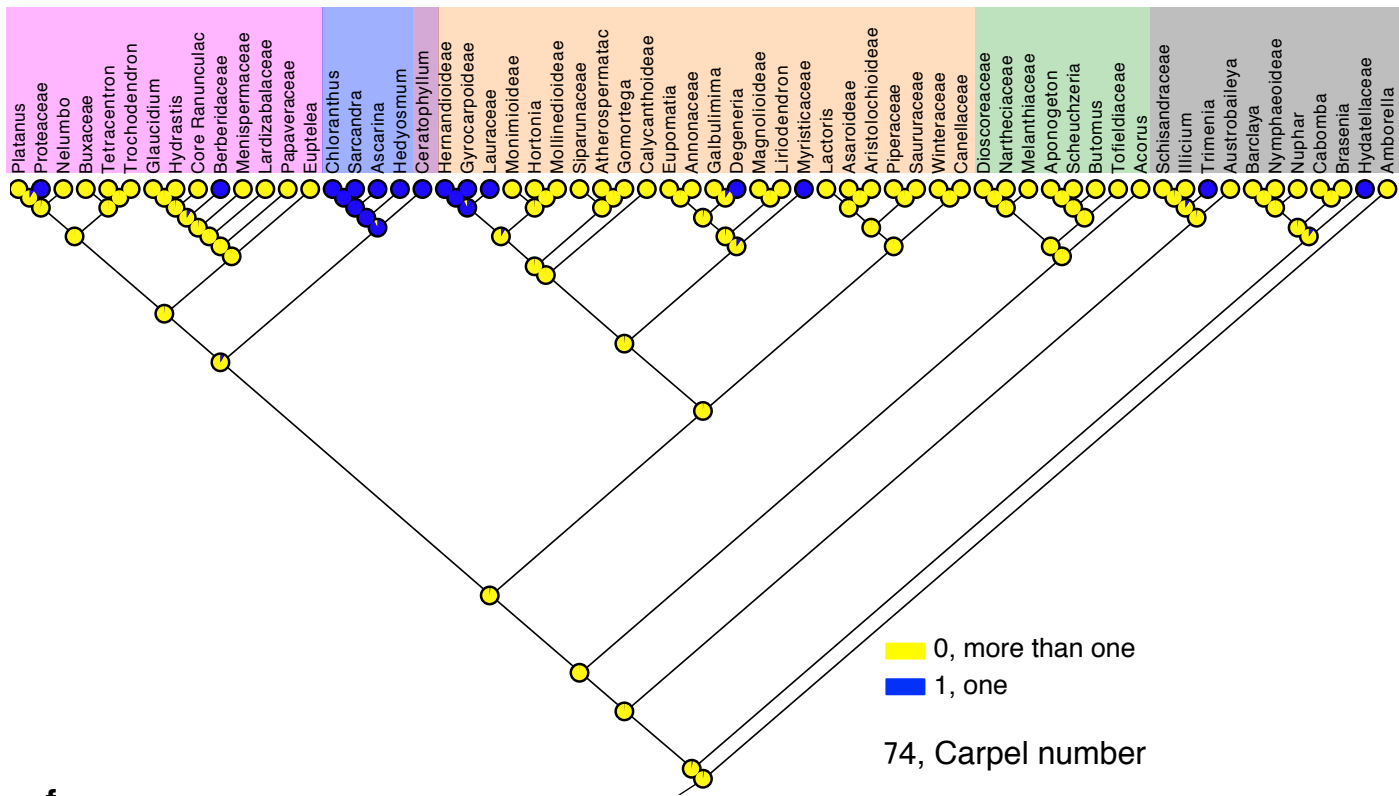

f

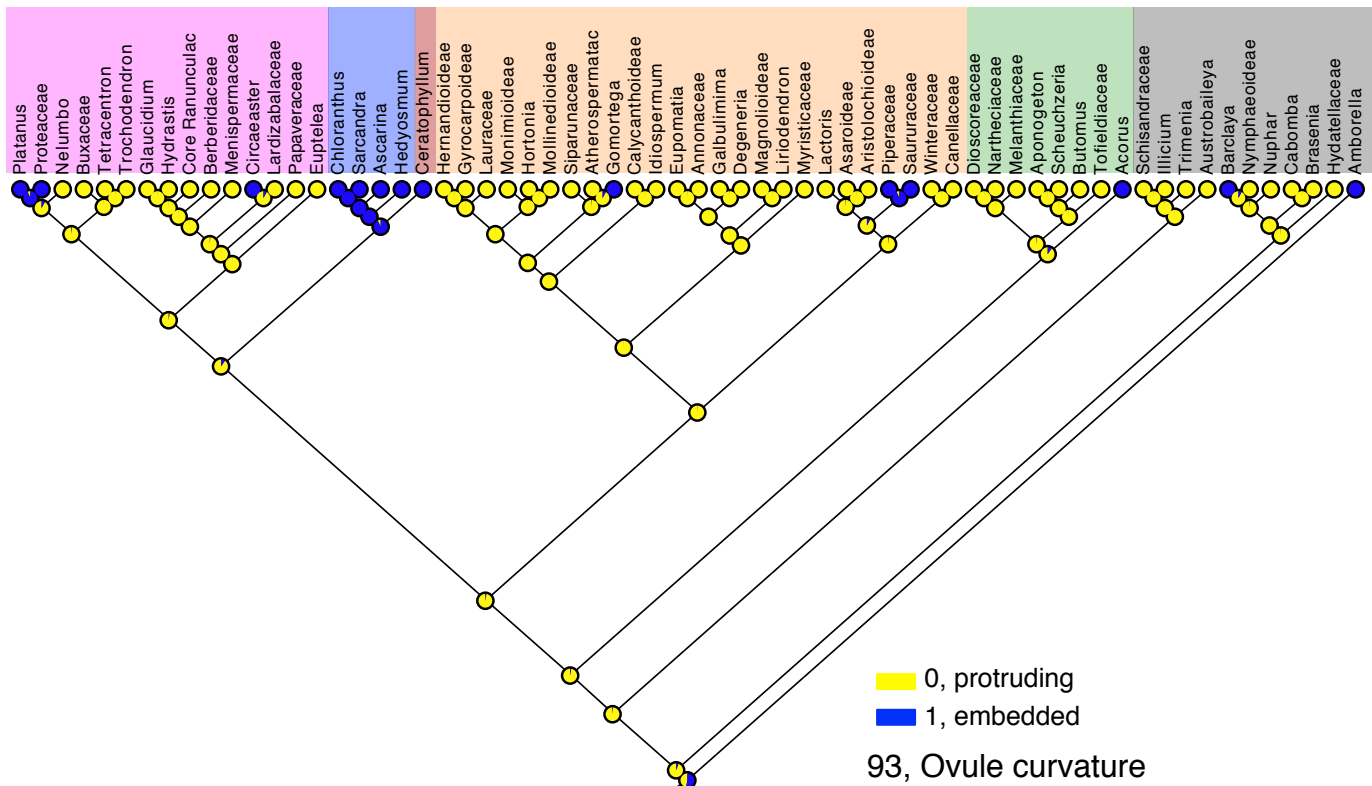

**Supplementary Fig. 15 (e-f). Six new morphological characters originated before the diversification of Chloranthaceae and Ceratophyllaceae.** Eudicots, Chloranthaceae, Ceratophyllaceae, magnoliids, monocots and basal angiosperms are highlighted by pink, blue, dark purple, orange, green and gray, respectively.

**a**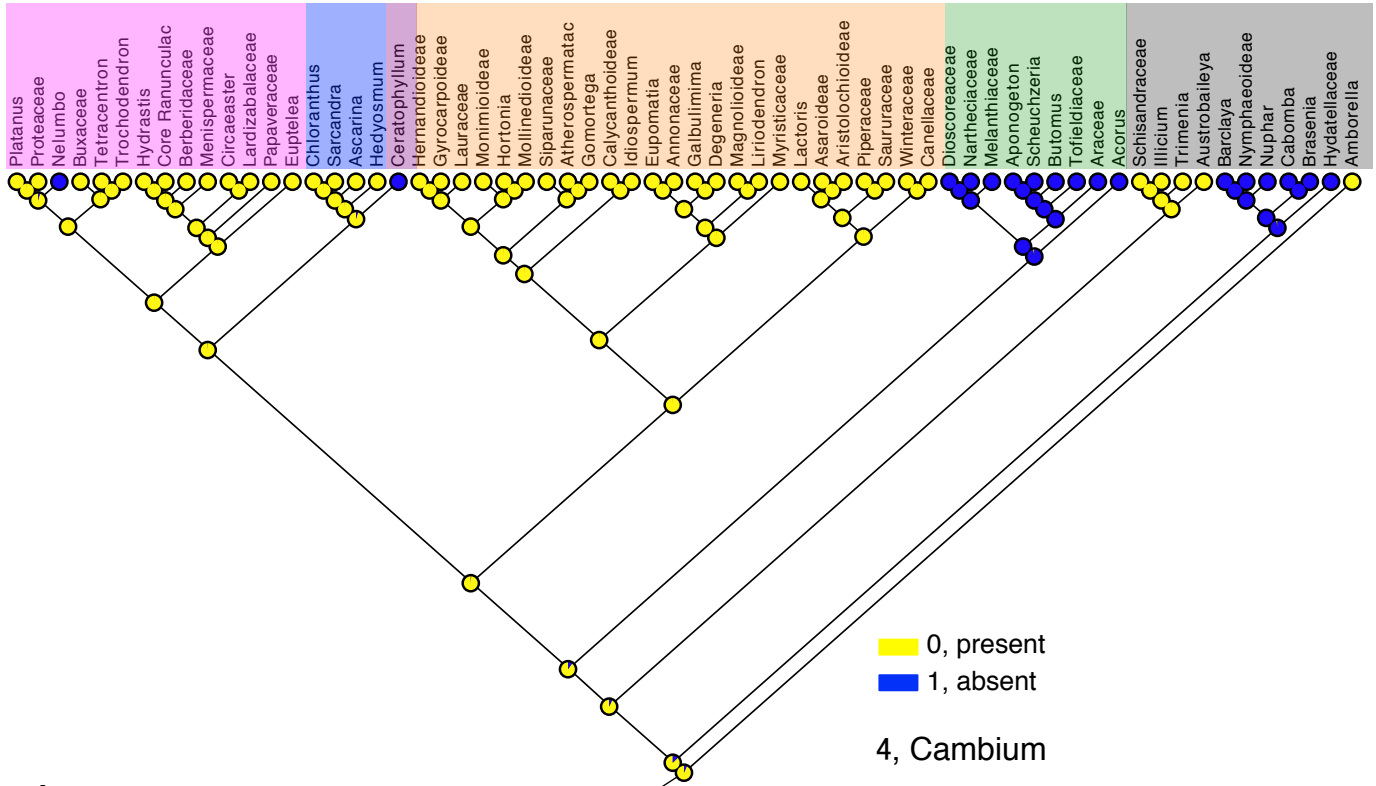**b**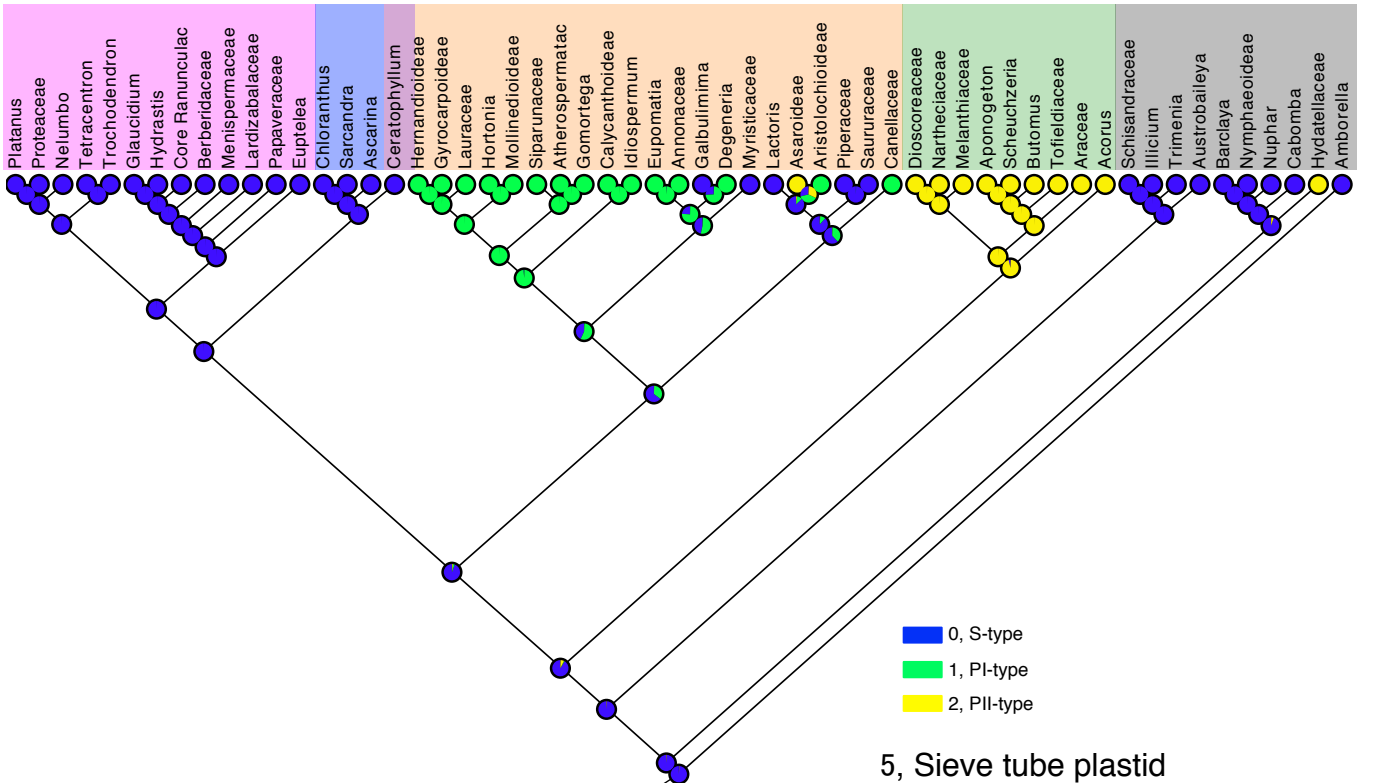

**Supplementary Fig. 16 (a-b). Seven new morphological characters originated before the diversification of monocots.** Eudicots, Chloranthaceae, Ceratophyllaceae, magnoliids, monocots and basal angiosperms are highlighted by pink, blue, dark purple, orange, green and gray, respectively.



c

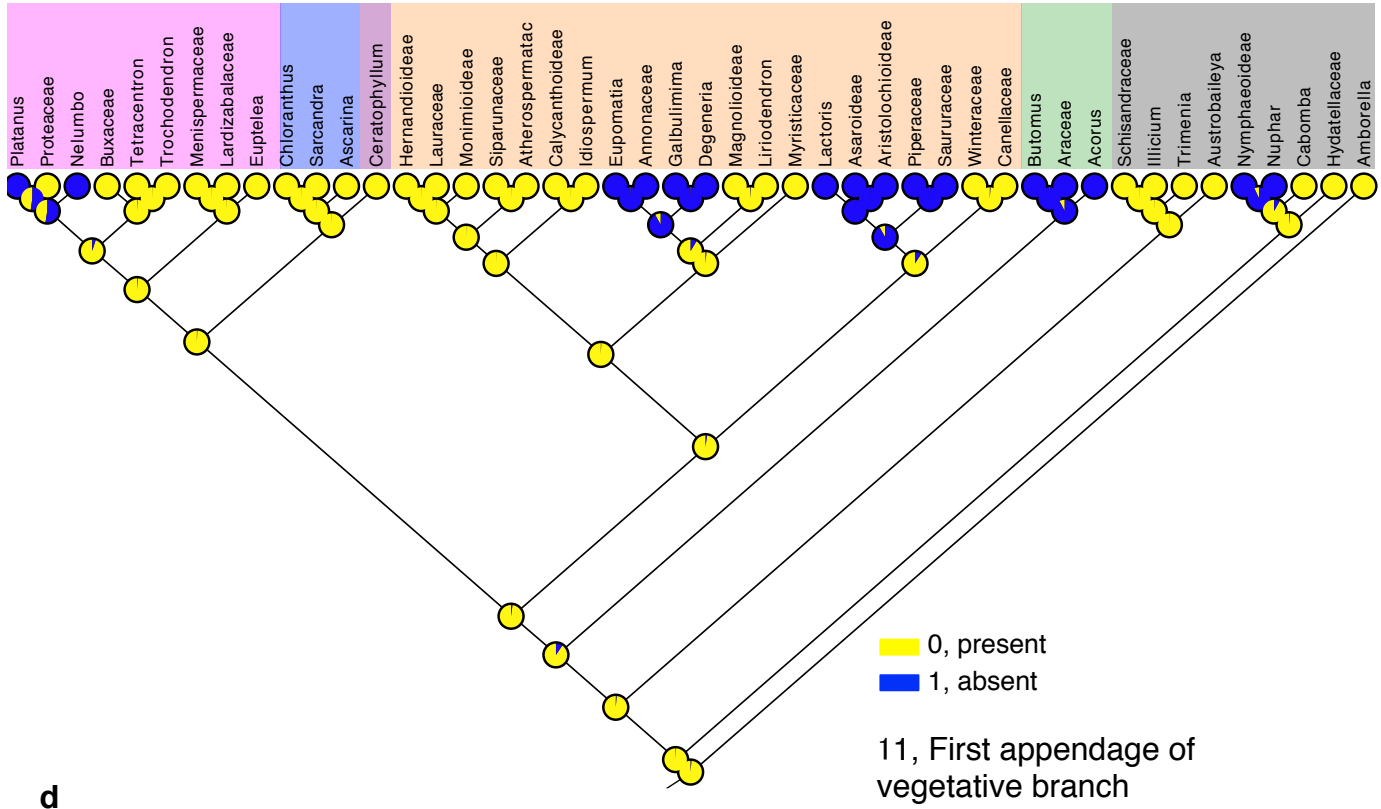

d

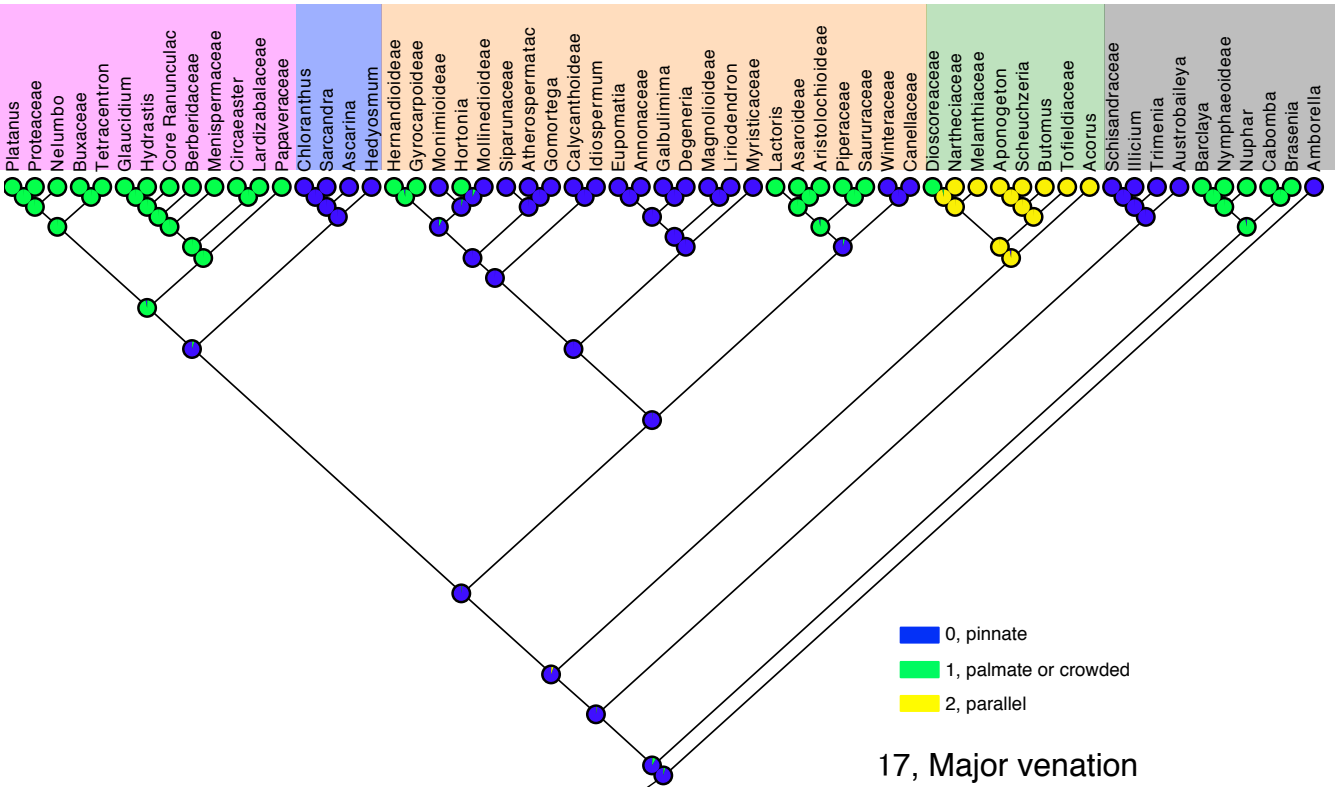

**Supplementary Fig. 16 (c-d). Seven new morphological characters originated before the diversification of monocots.** Eudicots, Chloranthaceae, Ceratophyllaceae, magnoliids, monocots and basal angiosperms are highlighted by pink, blue, dark purple, orange, green and gray, respectively.

e

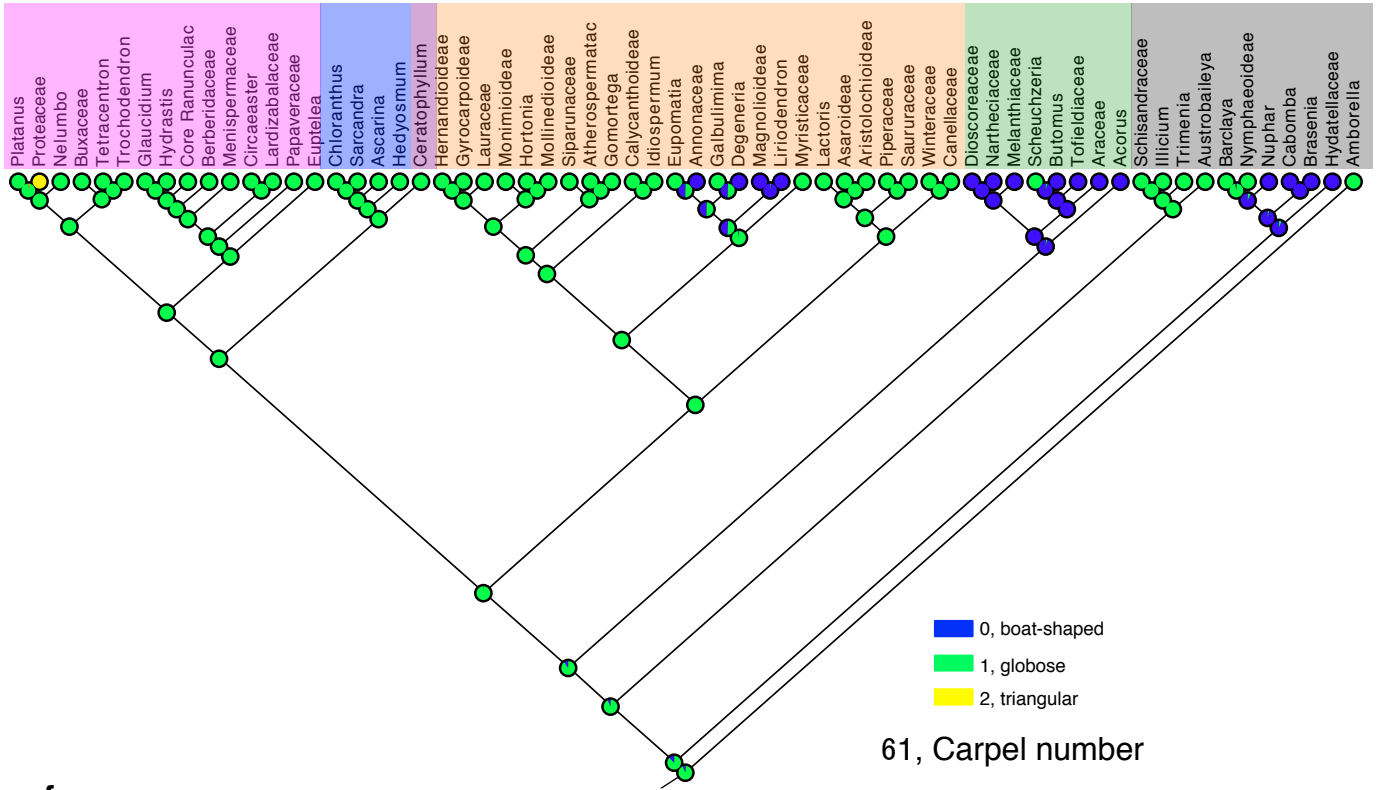

f

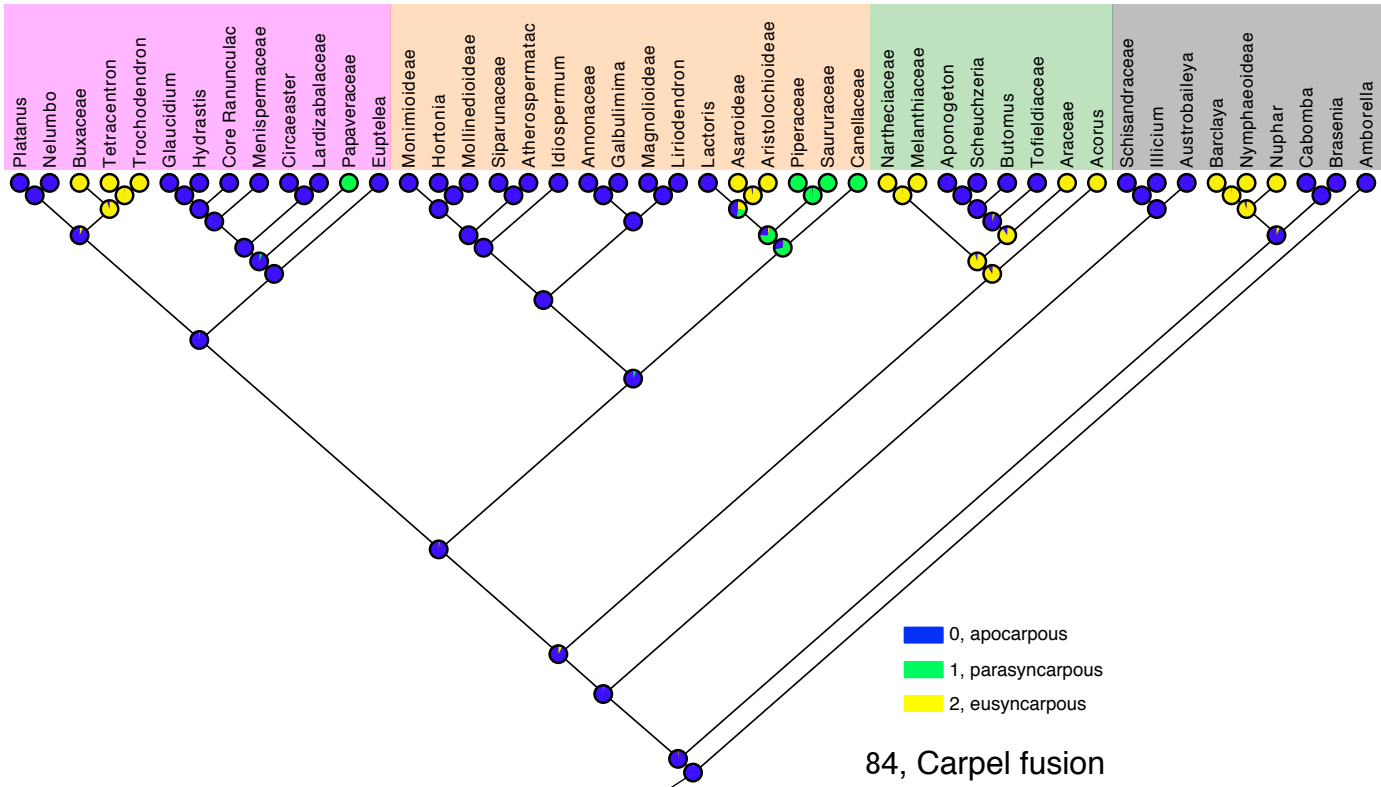

**Supplementary Fig. 16 (e-f). Seven new morphological characters originated before the diversification of monocots.** Eudicots, Chloranthaceae, Ceratophyllaceae, magnoliids, monocots and basal angiosperms are highlighted by pink, blue, dark purple, orange, green and gray, respectively.

g

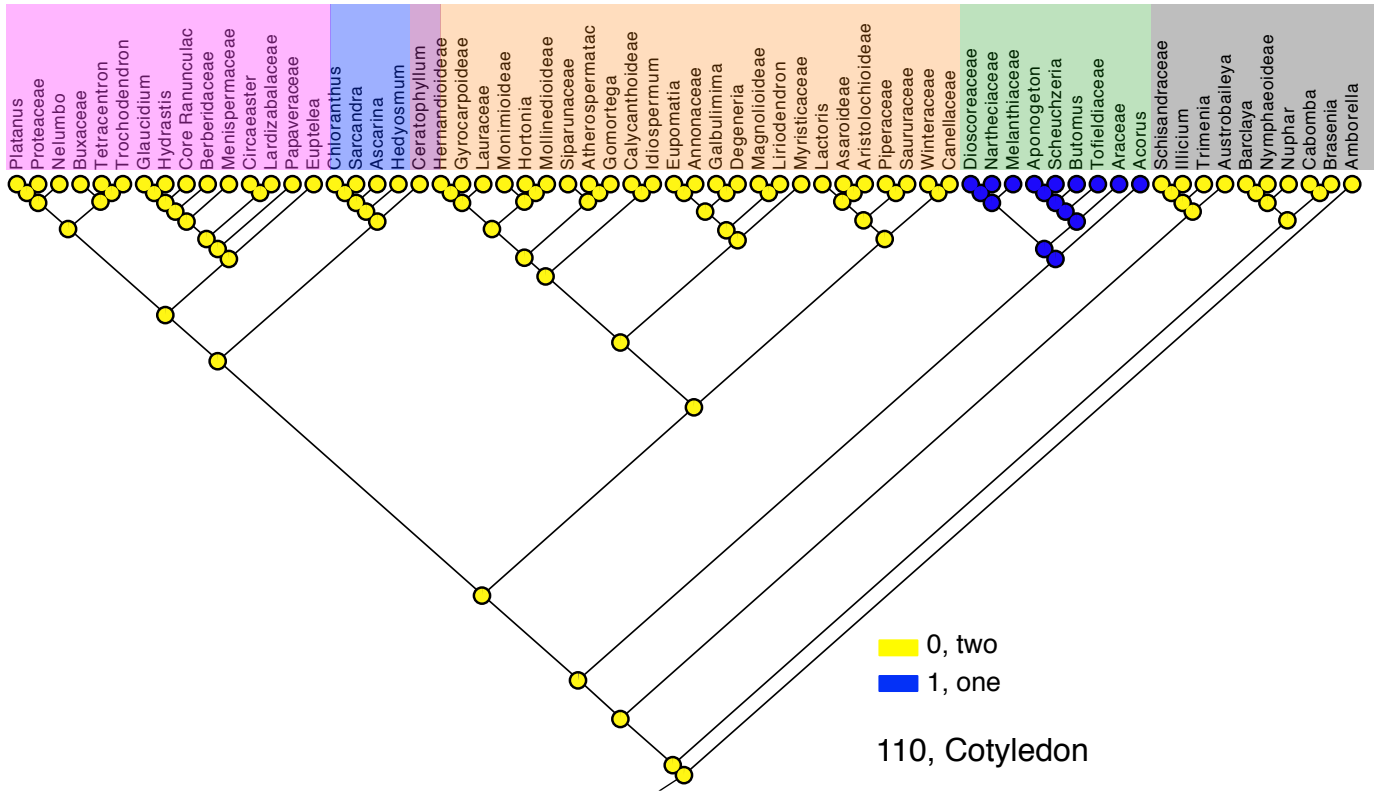

**Supplementary Fig. 16 (g). Seven new morphological characters originated before the diversification of monocots.** Eudicots, Chloranthaceae, Ceratophyllaceae, magnoliids, monocots and basal angiosperms are highlighted by pink, blue, dark purple, orange, green and gray, respectively.

**a**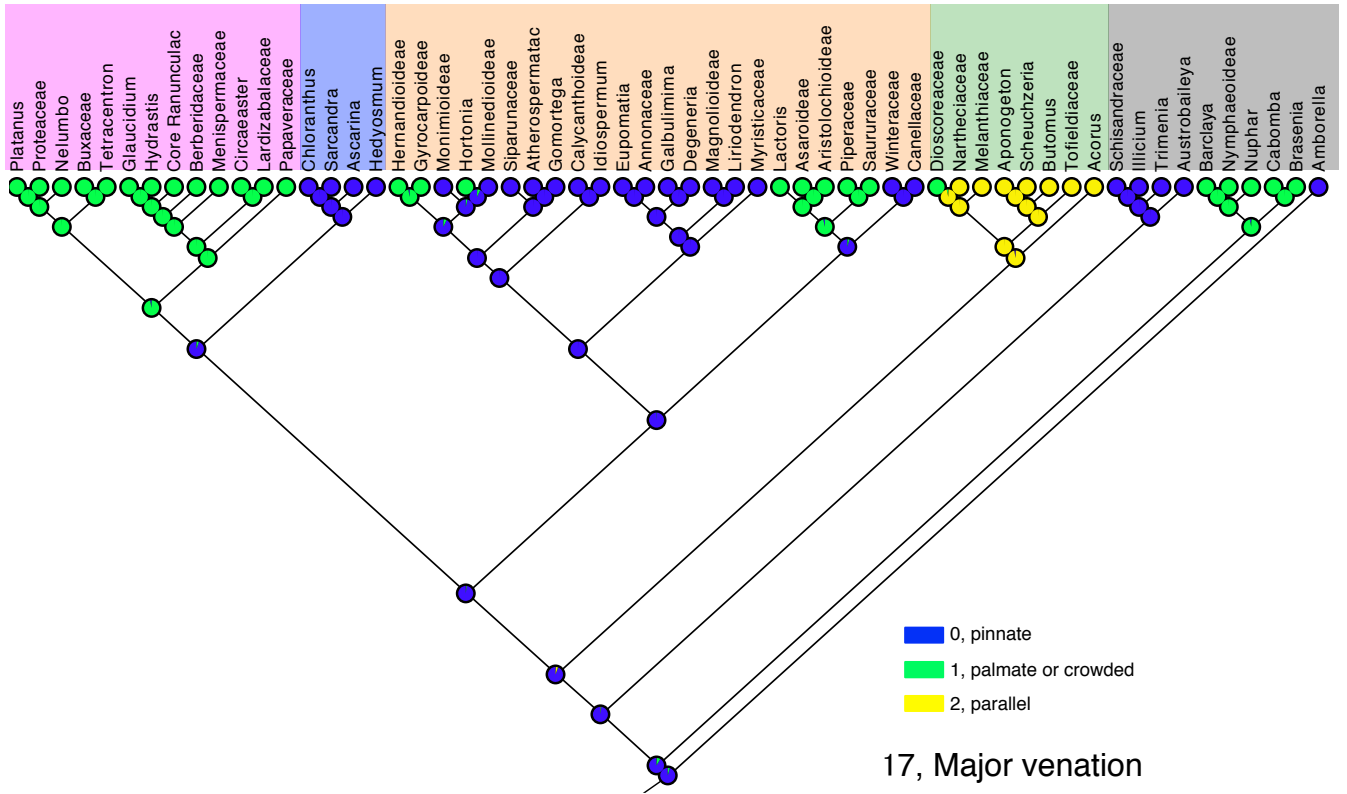**b**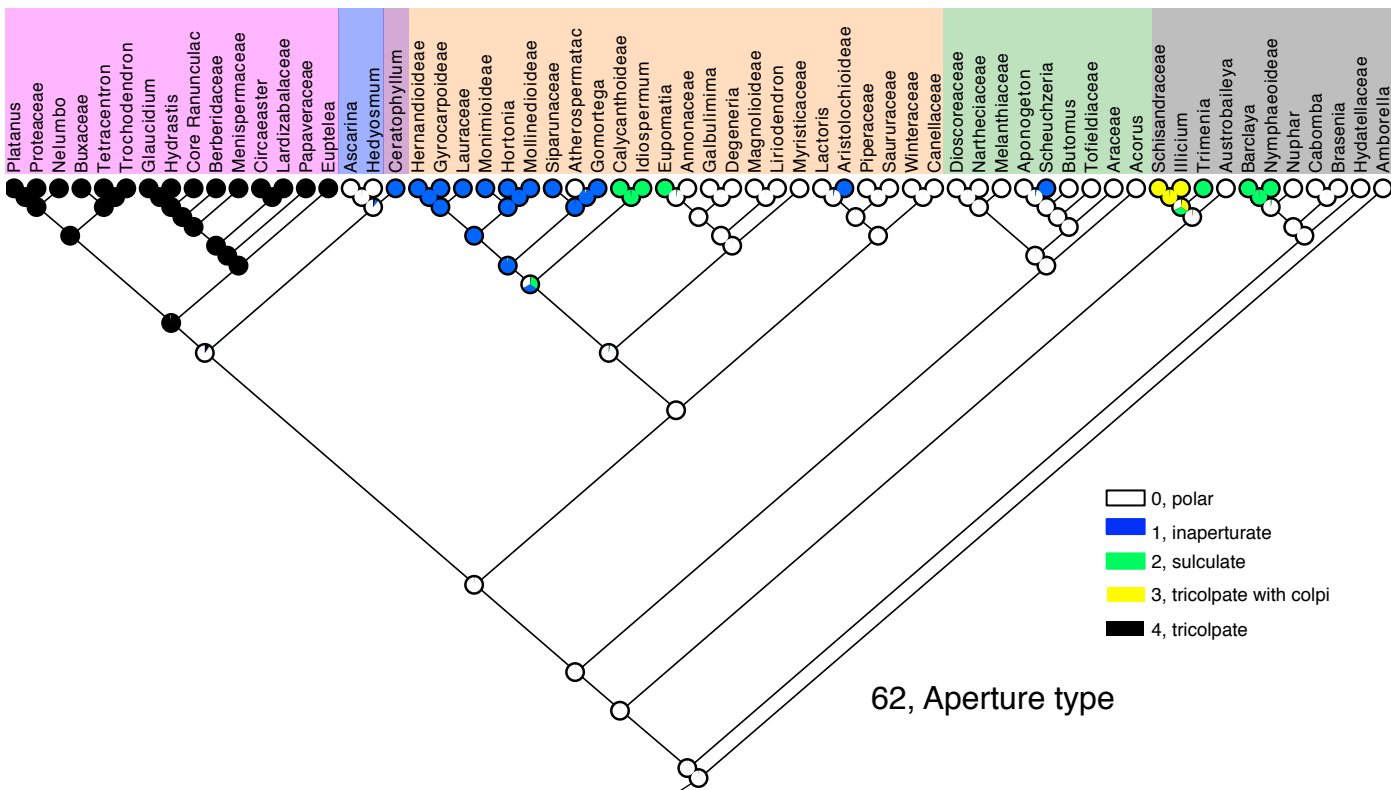

**Supplementary Fig. 17 (a-b). Two new morphological characters originated before the diversification of eudicots.** Eudicots, Chloranthaceae, Ceratophyllaceae, magnoliids, monocots and basal angiosperms are highlighted by pink, blue, dark purple, orange, green and gray, respectively.

**a**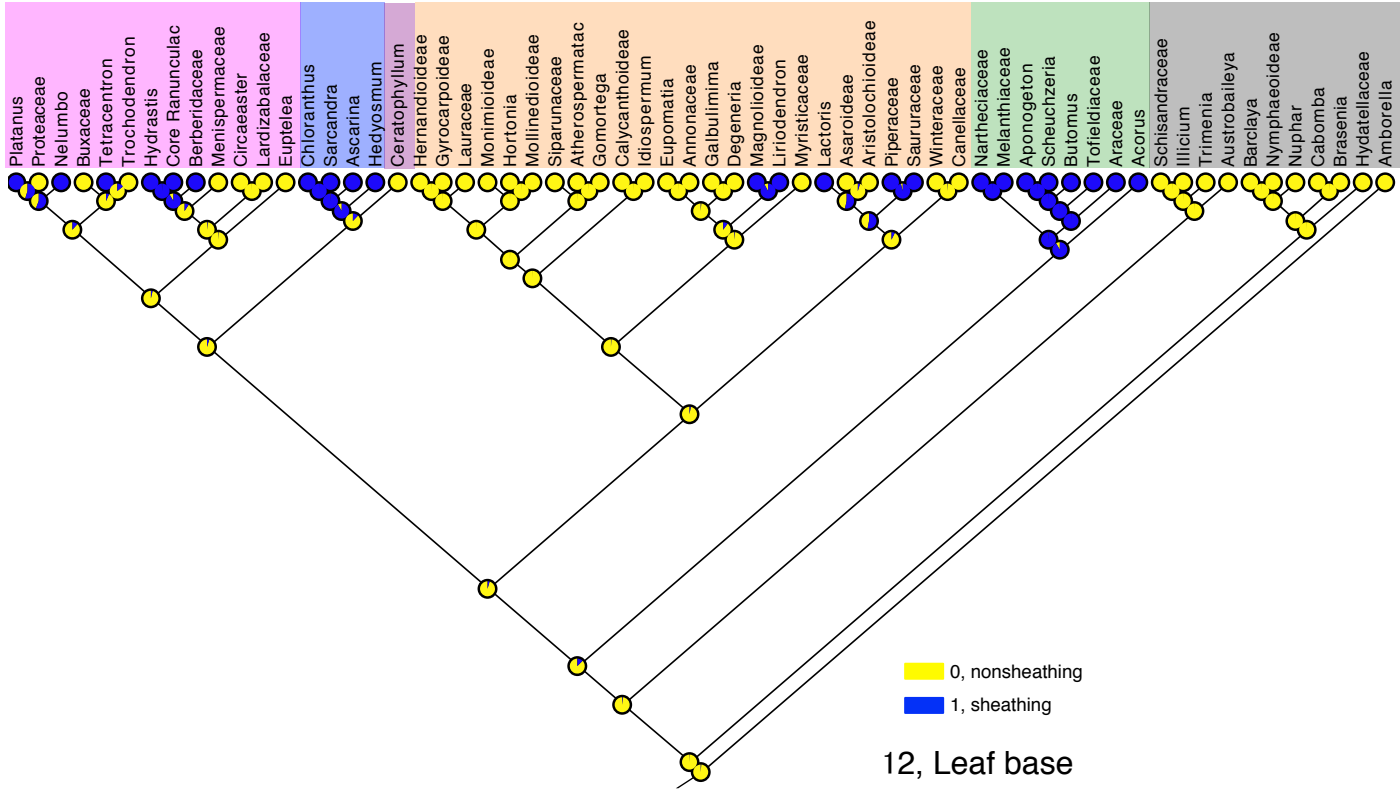**b**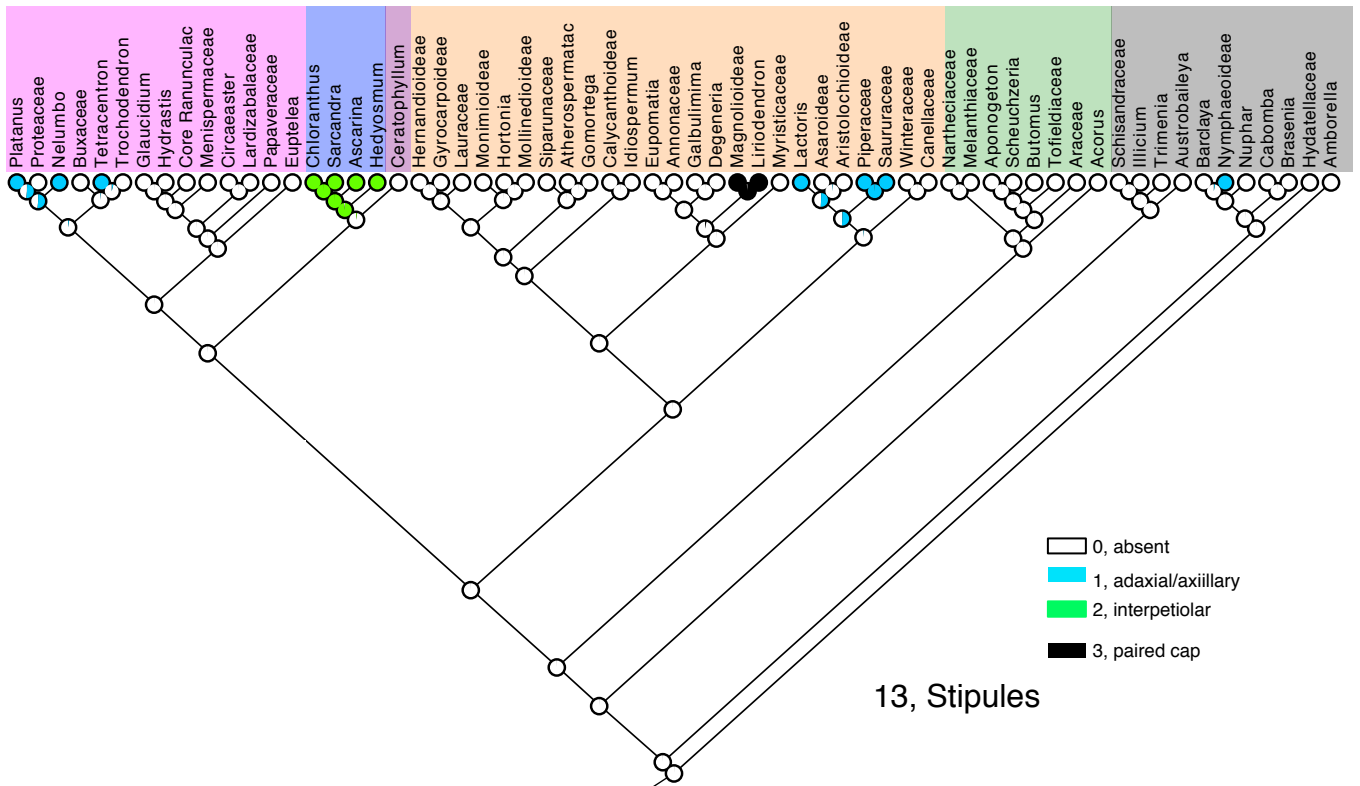

**Supplementary Fig. 18 (a-b). Three new morphological characters originated before the diversification of Chloranthaceae.** Eudicots, Chloranthaceae, Ceratophyllaceae, magnoliids, monocots and basal angiosperms are highlighted by pink, blue, dark purple, orange, green and gray, respectively.

**c**

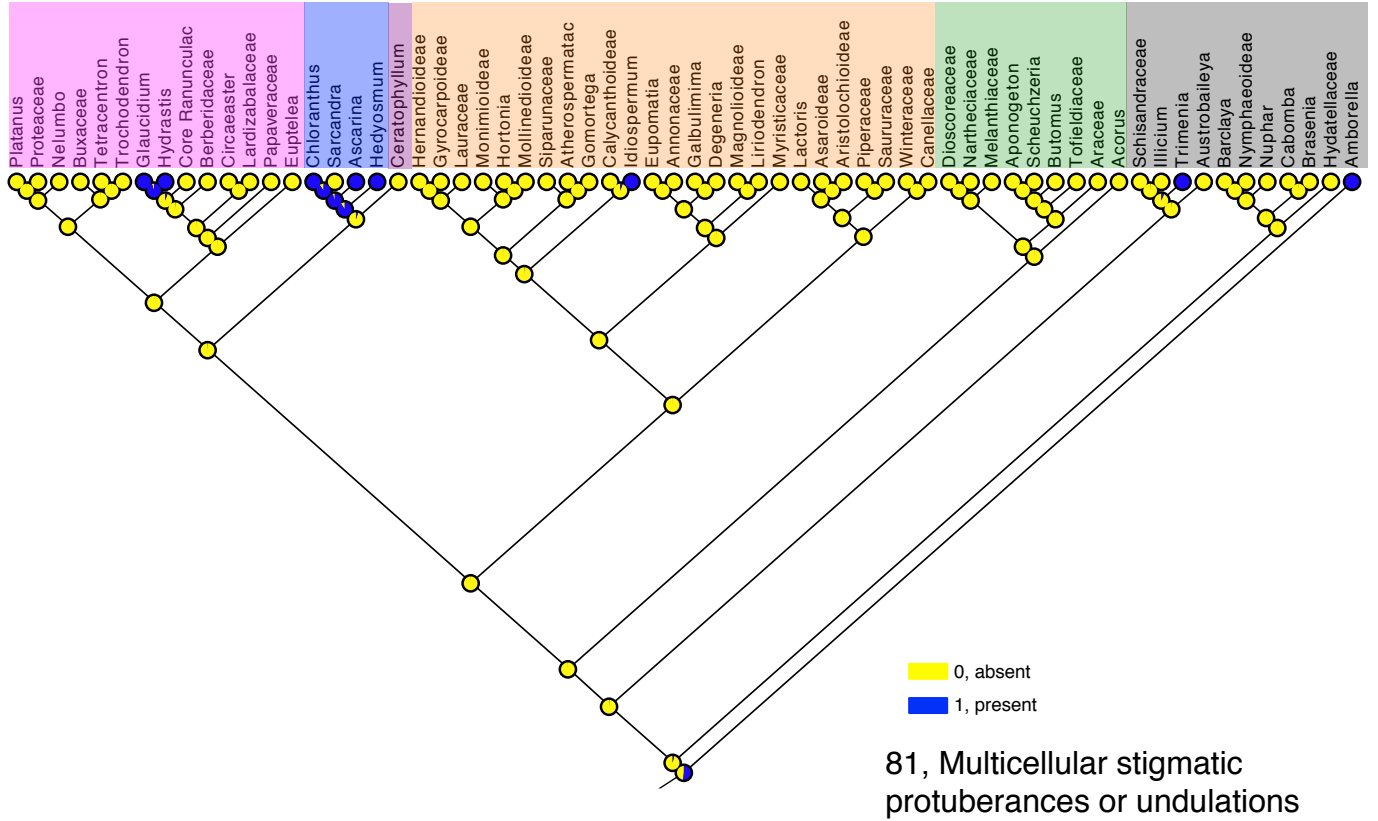

**Supplementary Fig. 18 (c). Three new morphological characters originated before the diversification of Chloranthaceae.** Eudicots, Chloranthaceae, Ceratophyllaceae, magnoliids, monocots and basal angiosperms are highlighted by pink, blue, dark purple, orange, green and gray, respectively.

a

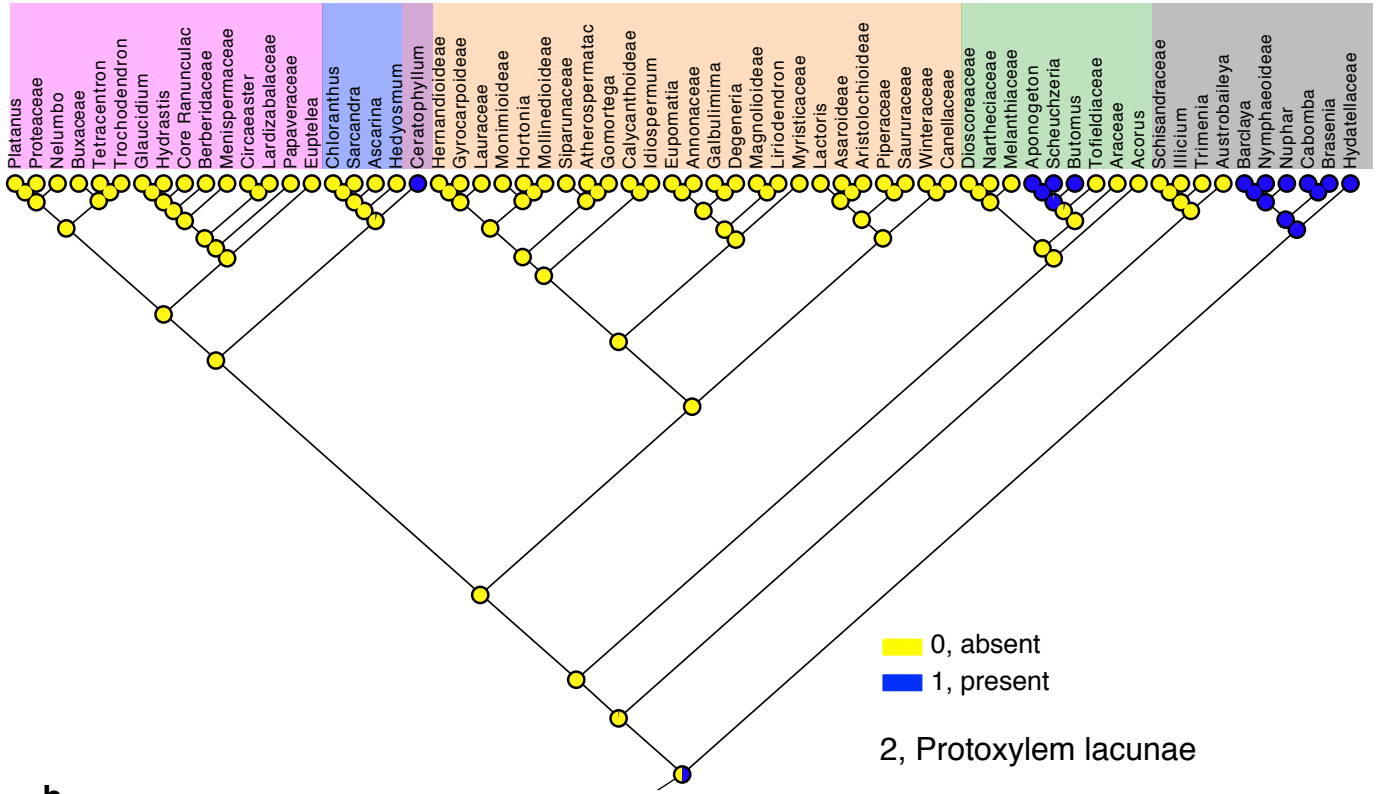

b

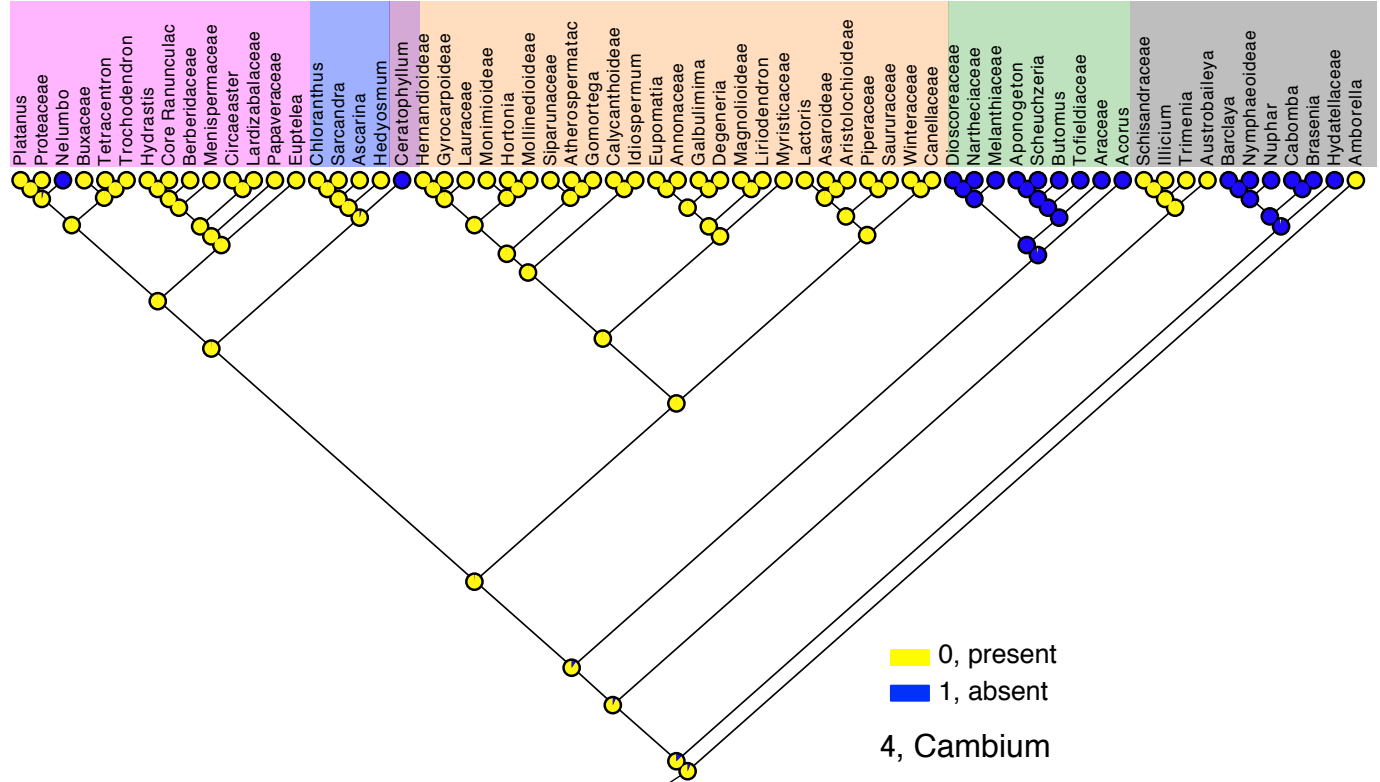

**Supplementary Fig. 19 (a-b).** Nine new morphological characters originated before the diversification of Ceratophyllaceae. Eudicots, Chloranthaceae, Ceratophyllaceae, magnoliids, monocots and basal angiosperms are highlighted by pink, blue, dark purple, orange, green and gray, respectively.

c

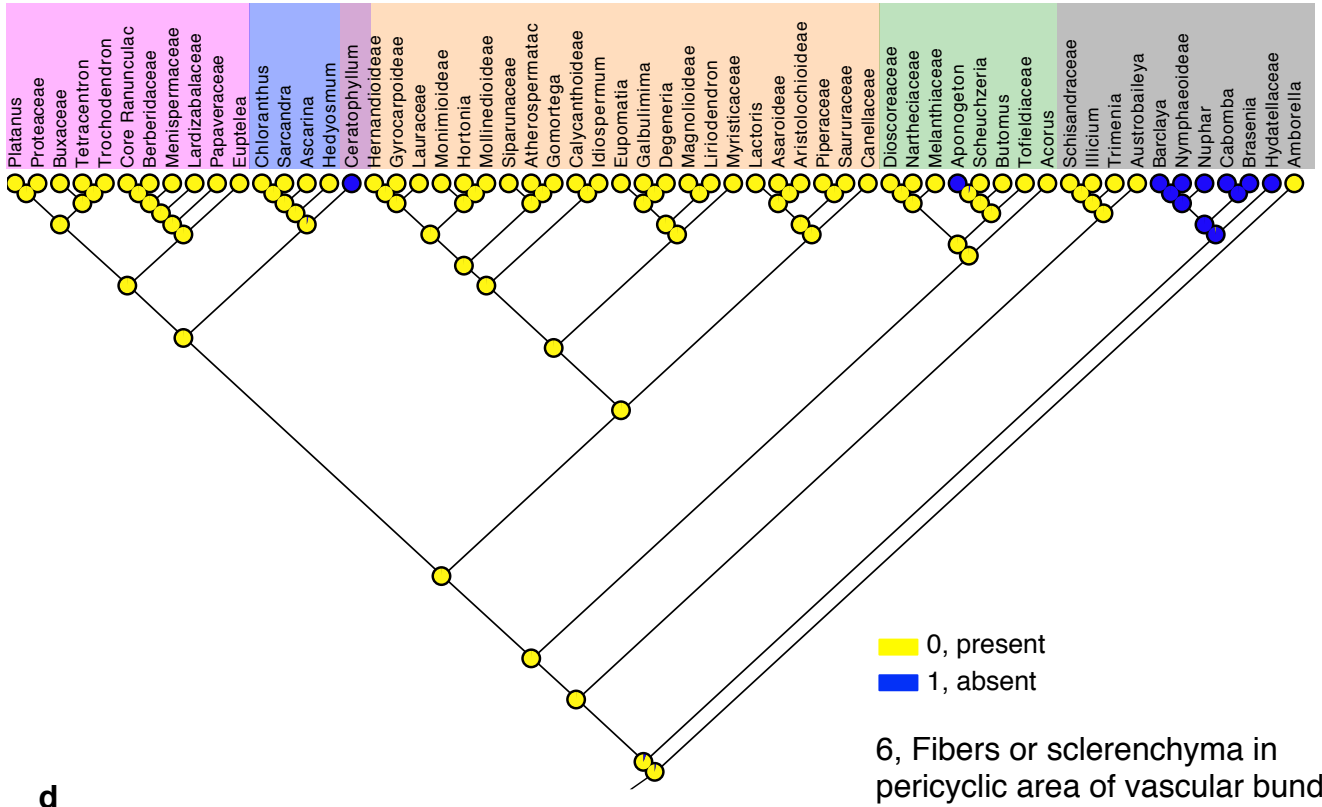

d

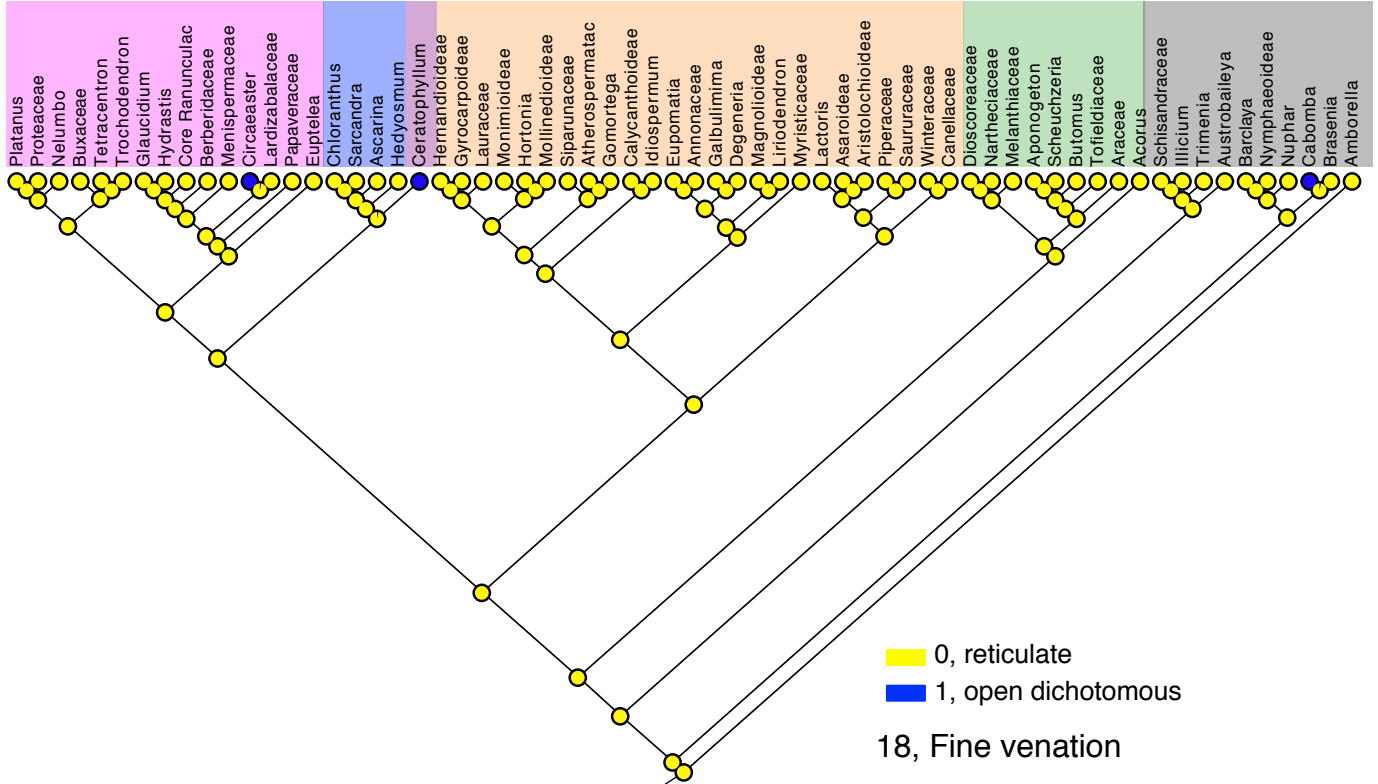

**Supplementary Fig. 19 (c-d). Nine new morphological characters originated before the diversification of Ceratophyllaceae.** Eudicots, Chloranthaceae, Ceratophyllaceae, magnoliids, monocots and basal angiosperms are highlighted by pink, blue, dark purple, orange, green and gray, respectively.



e

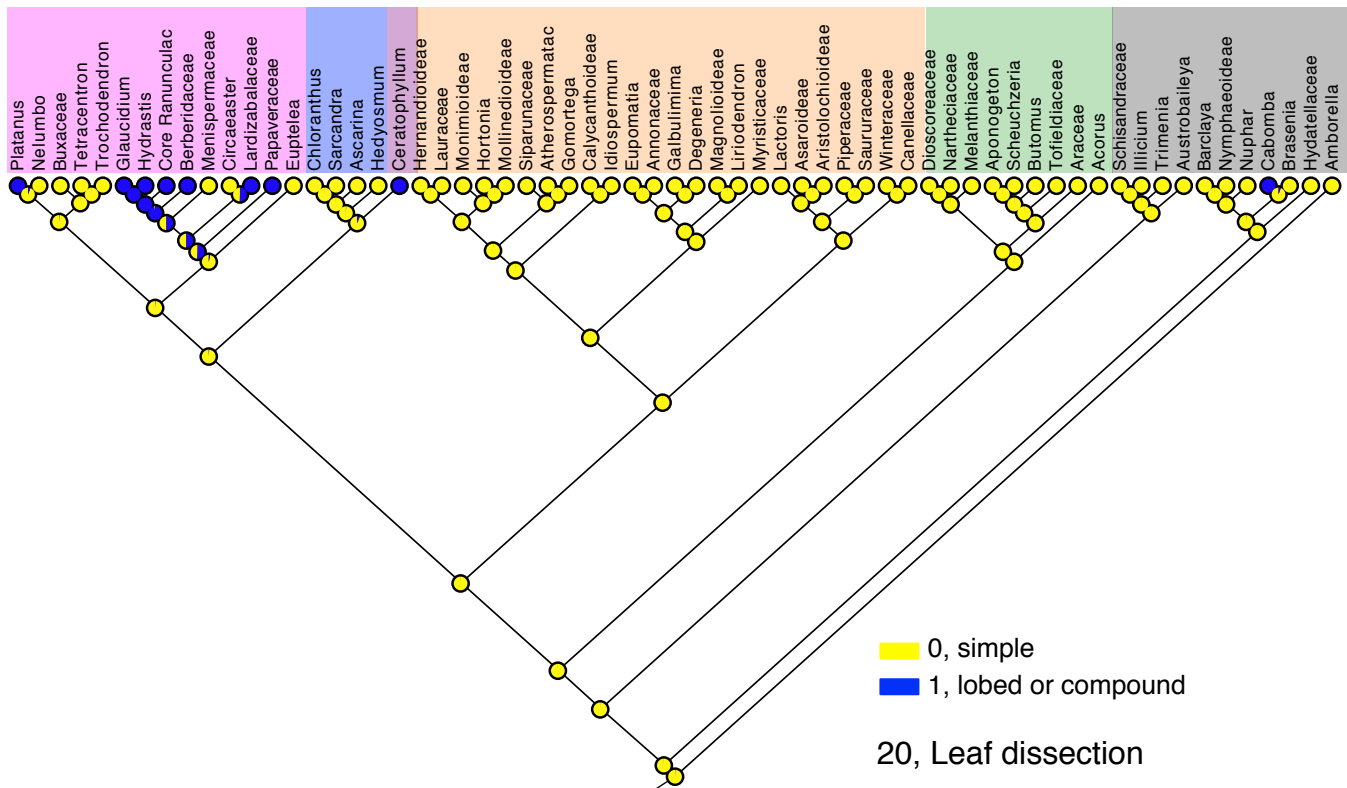

f

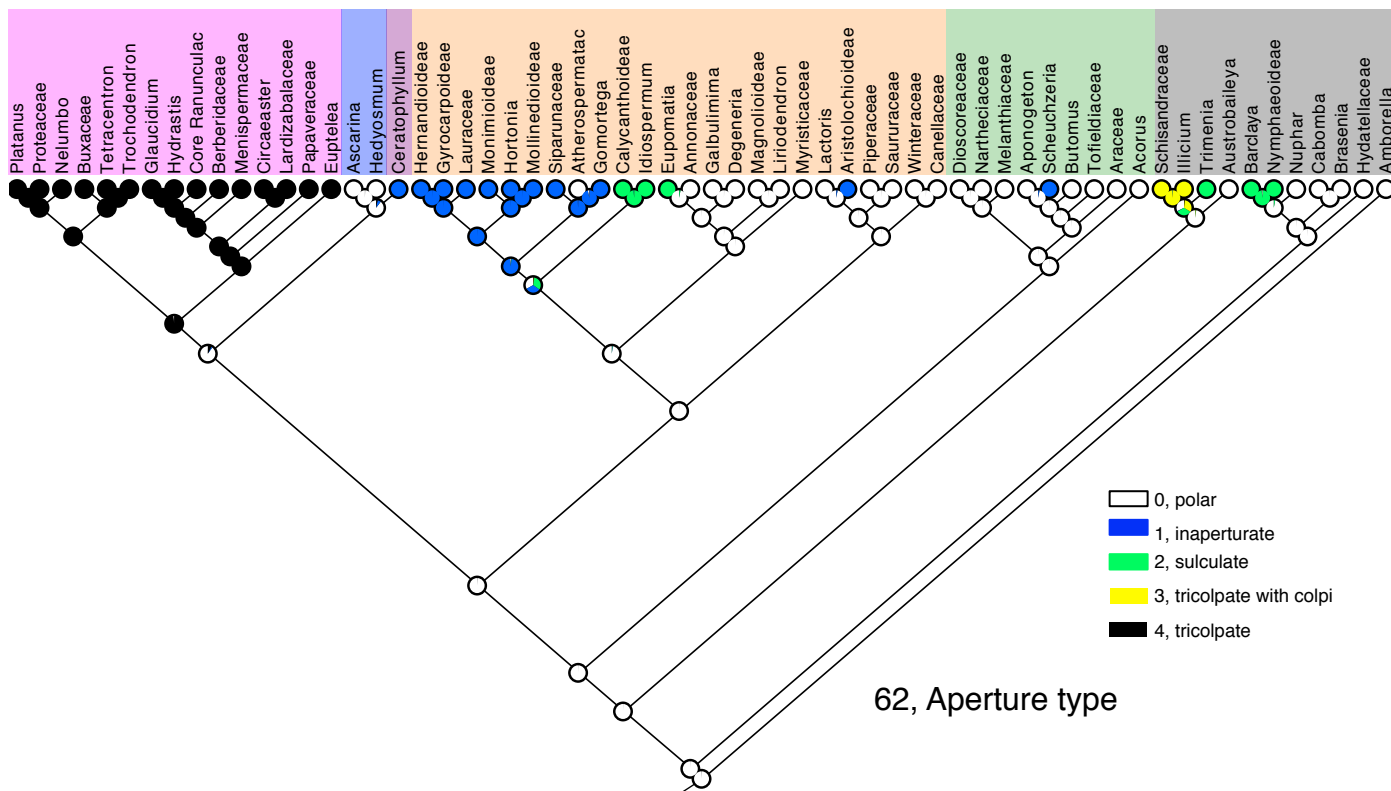

**Supplementary Fig. 19 (e-f).** Nine new morphological characters originated before the diversification of Ceratophyllaceae. Eudicots, Chloranthaceae, Ceratophyllaceae, magnoliids, monocots and basal angiosperms are highlighted by pink, blue, dark purple, orange, green and gray, respectively.

g

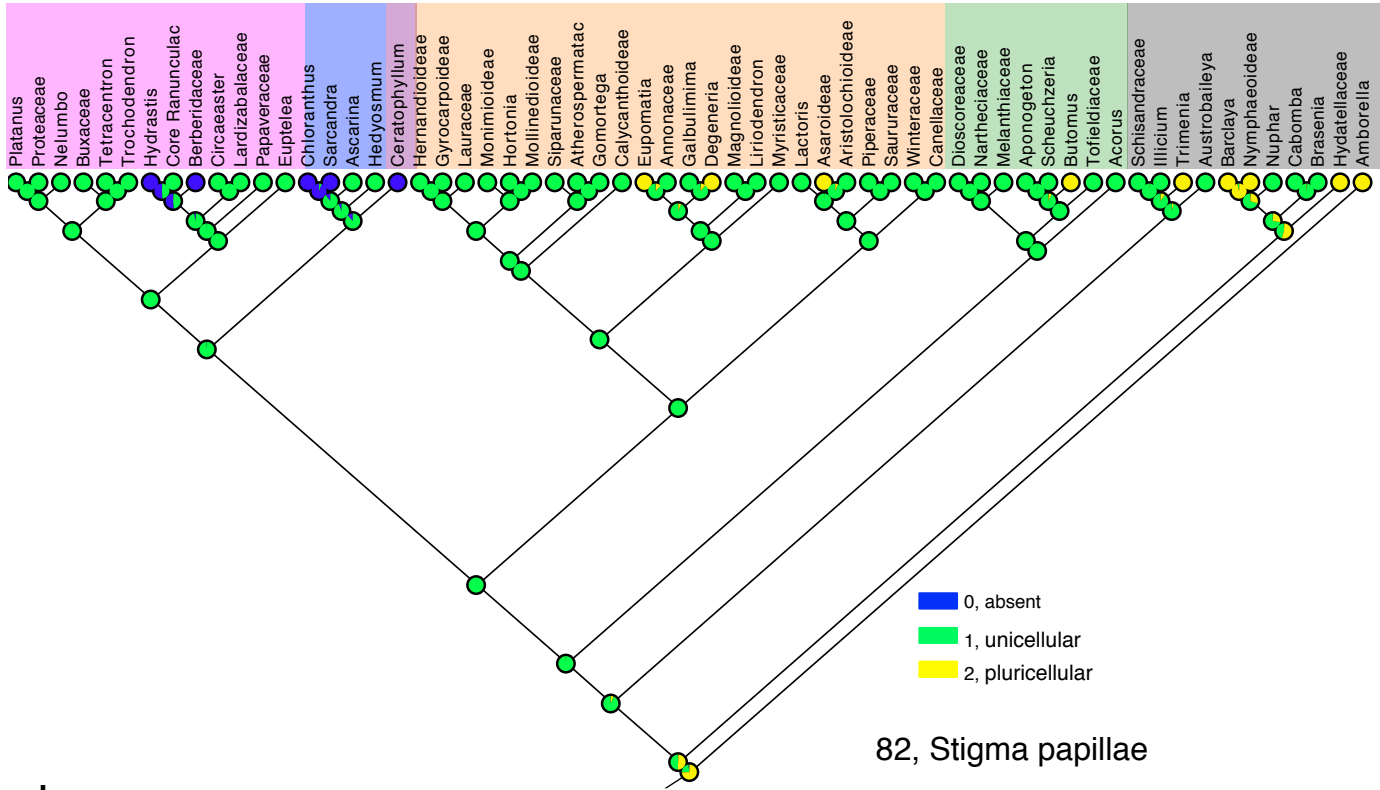

h

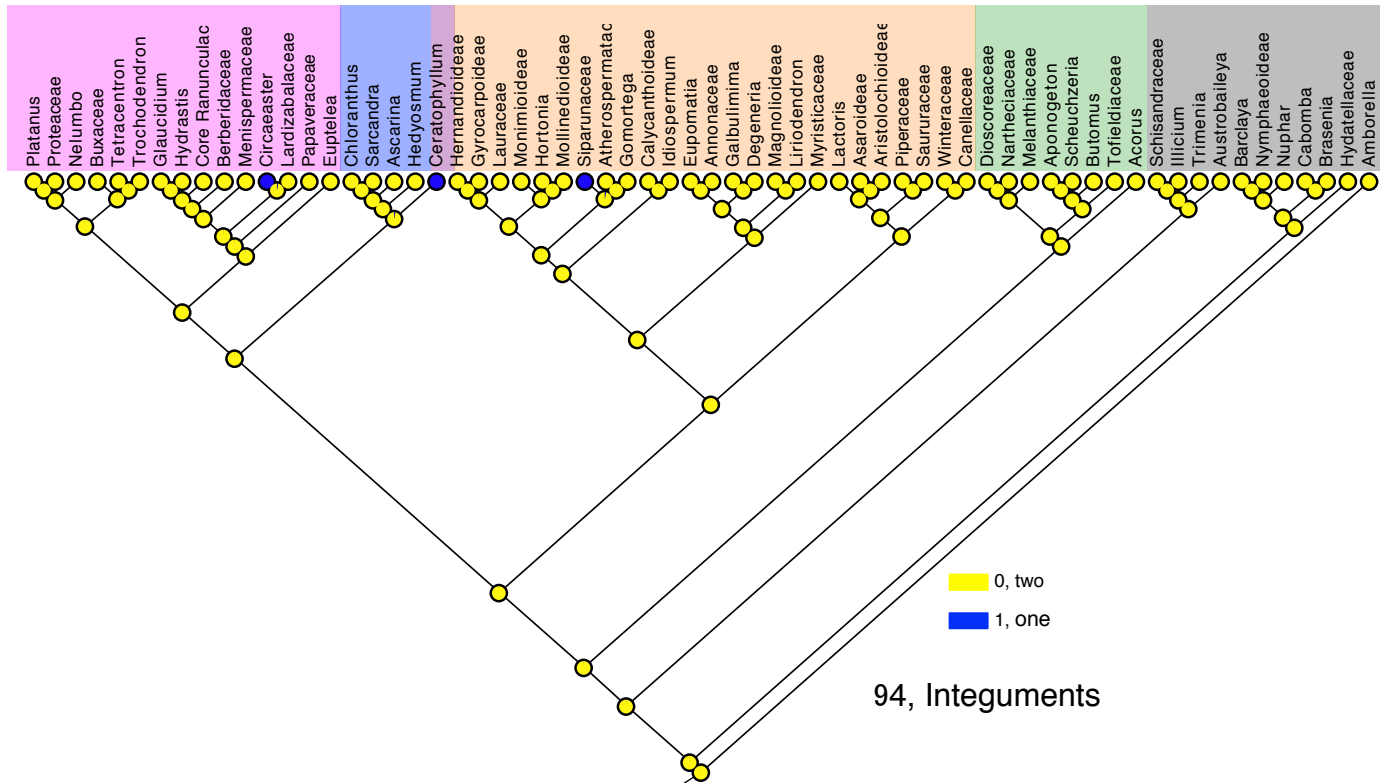

**Supplementary Fig. 19 (g-h). Nine new morphological characters originated before the diversification of Ceratophyllaceae.** Eudicots, Chloranthaceae, Ceratophyllaceae, magnoliids, monocots and basal angiosperms are highlighted by pink, blue, dark purple, orange, green and gray, respectively.

i

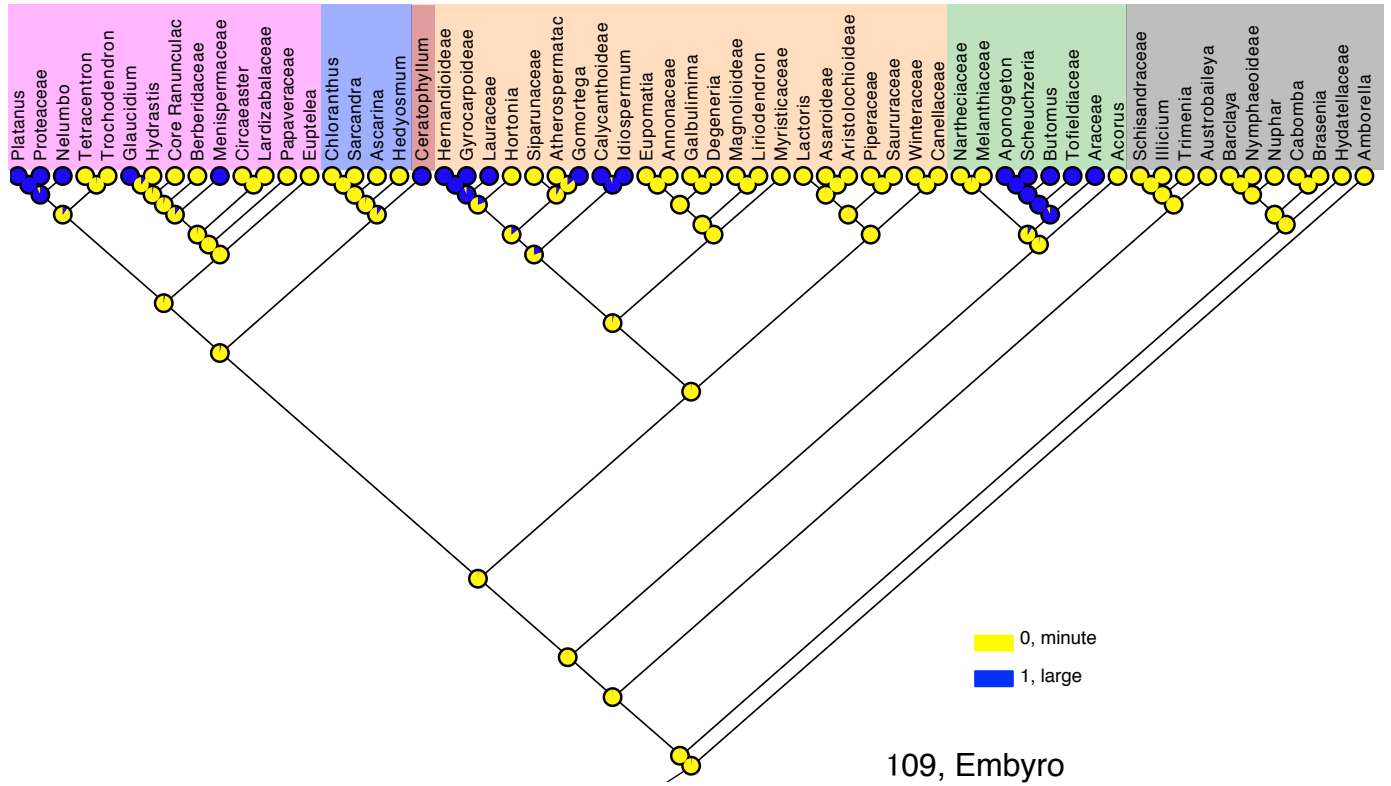

**Supplementary Fig. 19 (i). Nine new morphological characters originated before the diversification of Ceratophyllaceae.** Eudicots, Chloranthaceae, Ceratophyllaceae, magnoliids, monocots and basal angiosperms are highlighted by pink, blue, dark purple, orange, green and gray, respectively.

**a**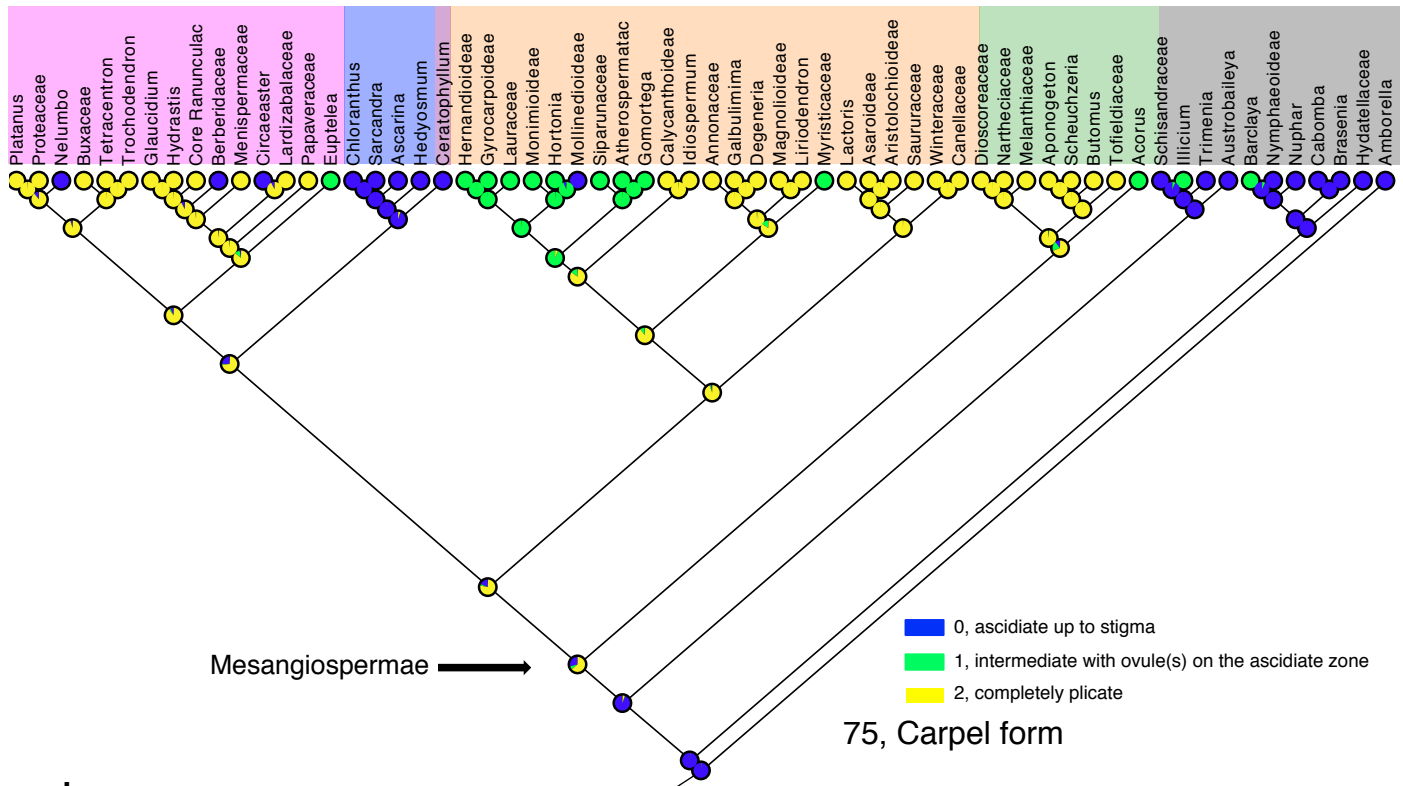**b**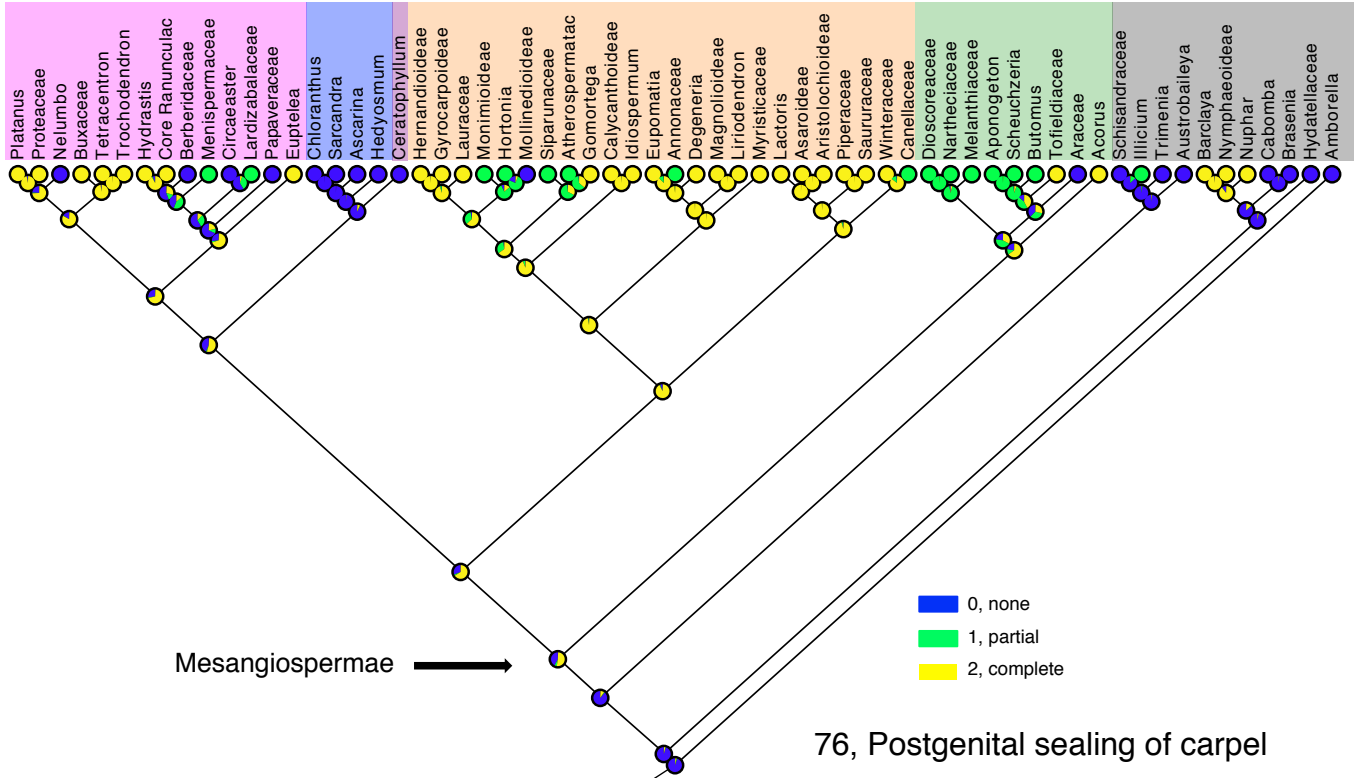

**Supplementary Fig. 20. Evolutionary patterns of carpel form (a) and postgenital sealing of carpel (b) in the context of our topology.** Eudicots, Chloranthaceae, Ceratophyllaceae, magnoliids, monocots and basal angiosperms are highlighted by pink, blue, dark purple, orange, green and gray, respectively.

**a**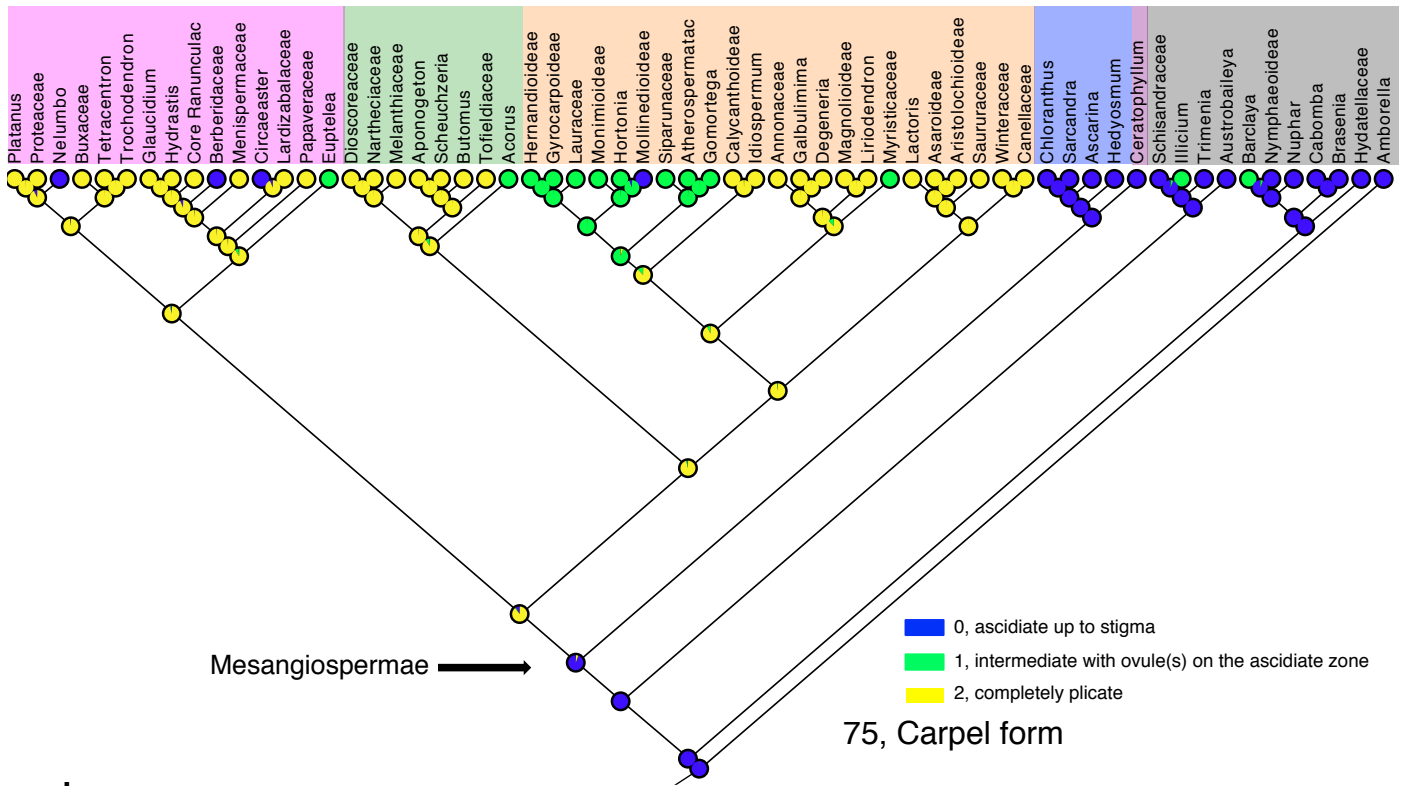**b**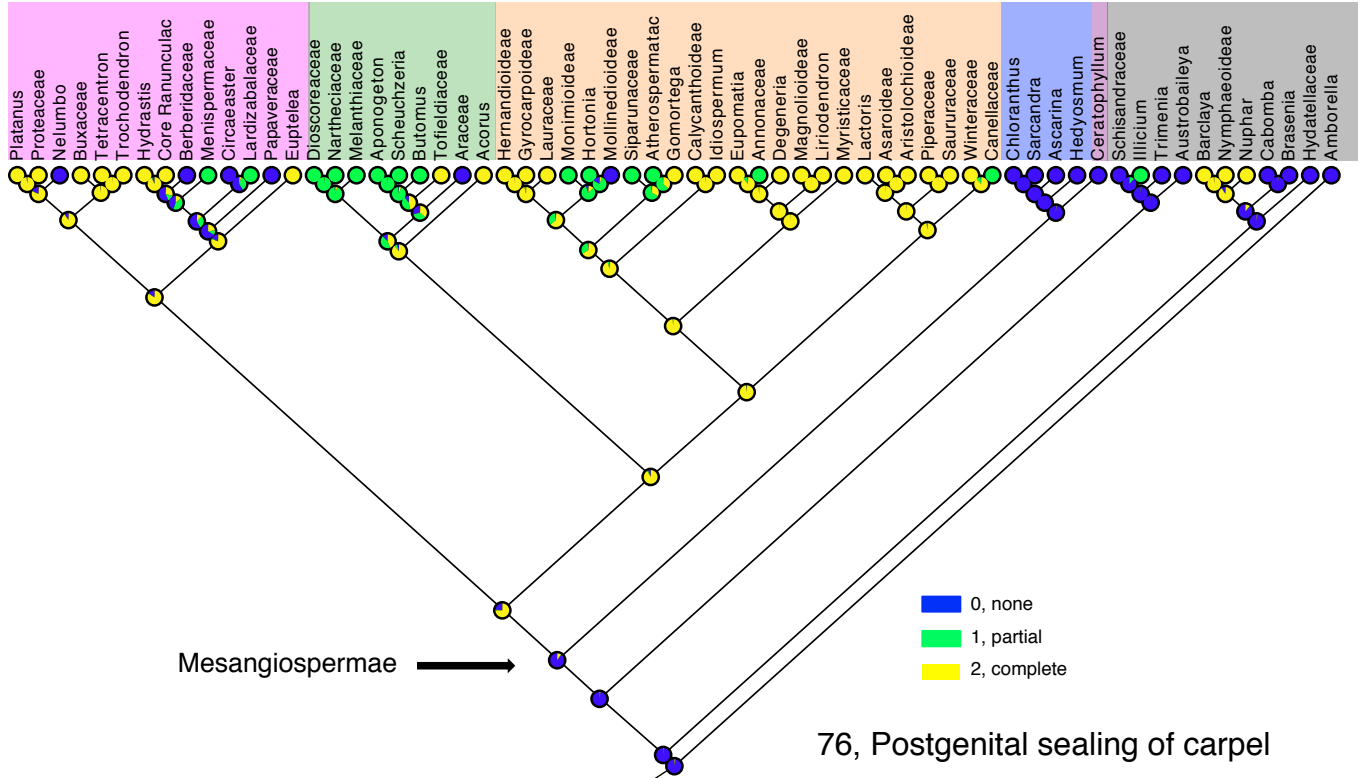

**Supplementary Fig. 21. Evolutionary patterns of carpel form (a) and postgenital sealing of carpel (b) in the context of E&D tree as shown in Fig. 1d.** Eudicots, Chloranthaceae, Ceratophyllaceae, magnoliids, monocots and basal angiosperms are highlighted by pink, blue, dark purple, orange, green and gray, respectively.

**a**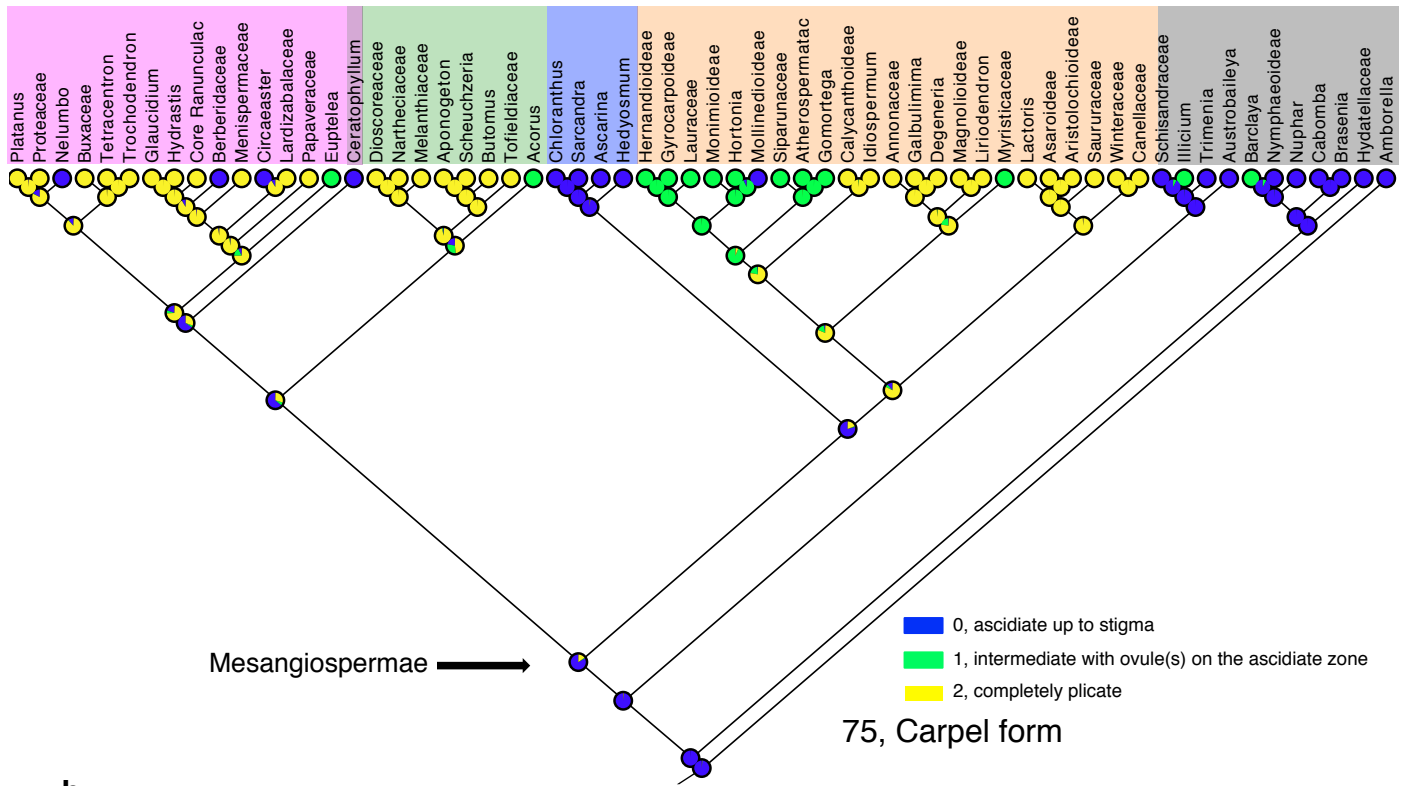**b**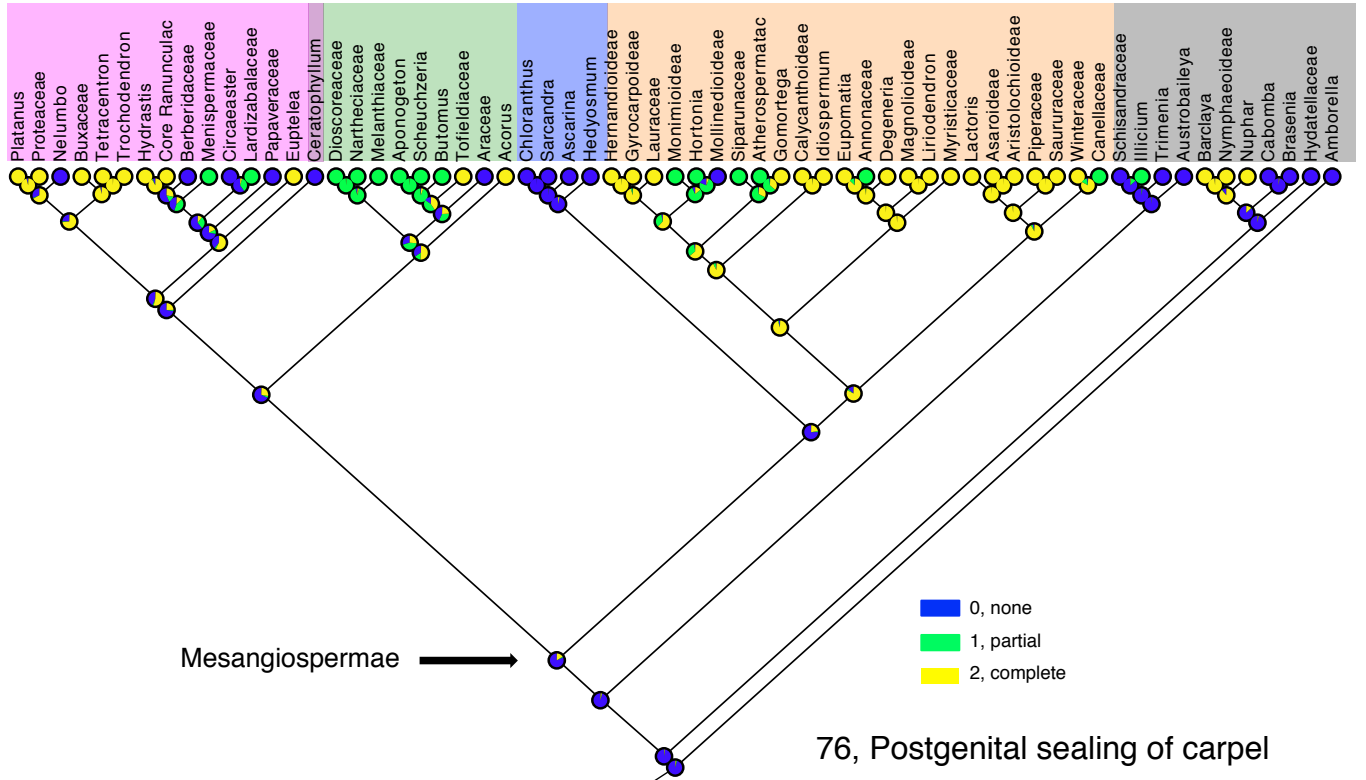

**Supplementary Fig. 22. Evolutionary patterns of carpel form (a) and postgenital sealing of carpel (b) in the context of the topology accepted by APG III as shown in Fig. 1a.** Eudicots, Chloranthaceae, Ceratophyllaceae, magnoliids, monocots and basal angiosperms are highlighted by pink, blue, dark purple, orange, green and gray, respectively.

**Supplementary Table 1: Taxa included in this study**

| <b>Species</b>                    | <b>Family</b>   | <b>Order</b>     | <b>Major lineage</b> | <b>Sources</b>                             |
|-----------------------------------|-----------------|------------------|----------------------|--------------------------------------------|
| <i>Selaginella moellendorffii</i> | Selaginellaceae | Selaginellales   | Lycophyte            | Phytozome                                  |
| <i>Pinus taeda</i>                | Pinaceae        | Pinales          | Gymnosperms          | NCBI                                       |
| <i>Picea sitchensis</i>           | Pinaceae        | Pinales          | Gymnosperms          | NCBI                                       |
| <i>Picea glauca</i>               | Pinaceae        | Pinales          | Gymnosperms          | NCBI                                       |
| <i>Ginkgo biloba</i>              | Ginkgoaceae     | Ginkgoales       | Gymnosperms          | This study                                 |
| <i>Amborella trichopoda</i>       | Amborellaceae   | Amborellales     | Basal angiosperm     | Ancestral Angiosperm Genome Project (AAGP) |
| <i>Nuphar advena</i>              | Nymphaeaceae    | Nymphaeales      | Basal angiosperm     | Floral Genome Group (FGP)                  |
| <i>Cabomba caroliniana</i>        | Cabombaceae     | Nymphaeales      | Basal angiosperm     | This study                                 |
| <i>Illicium henryi</i>            | Schisandraceae  | Austrobaileyales | Basal angiosperm     | This study                                 |
| <i>Acorus calamus</i>             | Acoraceae       | Acorales         | Monocots             | This study                                 |
| <i>Alisma plantago-aquatica</i>   | Alismataceae    | Alismatales      | Monocots             | This study                                 |
| <i>Pinellia ternata</i>           | Araceae         | Alismatales      | Monocots             | This study                                 |
| <i>Dioscorea opposita</i>         | Dioscoreaceae   | Dioscoreales     | Monocots             | This study                                 |
| <i>Pandanus utilis</i>            | Pandanaceae     | Pandanales       | Monocots             | This study                                 |
| <i>Lilium brownii</i>             | Lilaceae        | Lilales          | Monocots             | This study                                 |
| <i>Asparagus officinalis</i>      | Asparagaceae    | Asparagales      | Monocots             | This study                                 |
| <i>Irish japonica</i>             | Iridaceae       | Asparagales      | Monocots             | This study                                 |
| <i>Yucca filamentosa</i>          | Agavaceae       | Asparagales      | Monocots             | This study                                 |
| <i>Trachycarpus fortunei</i>      | Arecaceae       | Arecales         | Monocots             | This study                                 |
| <i>Canna indica</i>               | Cannaceae       | Zingiberales     | Monocots             | This study                                 |
| <i>Musa acuminata</i>             | Musaceae        | Zingiberales     | Monocots             | Phytozome                                  |
| <i>Sorghum bicolor</i>            | Poaceae         | Poales           | Monocots             | Phytozome                                  |
| <i>Setaria italica</i>            | Poaceae         | Poales           | Monocots             | Phytozome                                  |

|                                 |                  |                 |                 |            |
|---------------------------------|------------------|-----------------|-----------------|------------|
| <i>Oryza sativa</i>             | Poaceae          | Poales          | Monocots        | Phytozome  |
| <i>Brachypodium distachyon</i>  | Poaceae          | Poales          | Monocots        | Phytozome  |
| <i>Zea mays</i>                 | Poaceae          | Poales          | Monocots        | Phytozome  |
| <i>Panicum vitgatum</i>         | Poaceae          | Poales          | Monocots        | Phytozome  |
| <i>Houttuynia cordata</i>       | Saururaceae      | Piperales       | Magnoliids      | This study |
| <i>Aristolochia tagala</i>      | Aristolochiaceae | Piperales       | Magnoliids      | This study |
| <i>Saruma henryi</i>            | Aristolochiaceae | Piperales       | Magnoliids      | FGP        |
| <i>Liriodendron tulipifera</i>  | Magnoliaceae     | Magnoliales     | Magnoliids      | This study |
| <i>Magnolia denudata</i>        | Magnoliaceae     | Magnoliales     | Magnoliids      | This study |
| <i>Chimonanthus praecox</i>     | Calycanthaceae   | Laurales        | Magnoliids      | This study |
| <i>Cinnamomum camphora</i>      | Lauraceae        | Laurales        | Magnoliids      | This study |
| <i>Persea americana</i>         | Lauraceae        | Laurales        | Magnoliids      | AAGP       |
| <i>Ceratophyllum demersum</i>   | Ceratophyllaceae | Ceratophyllales | Ceratophyllales | This study |
| <i>Ceratophyllum oryzetorum</i> | Ceratophyllaceae | Ceratophyllales | Ceratophyllales | This study |
| <i>Chloranthus japonicus</i>    | Chloranthaceae   | Chloranthales   | Chloranthales   | This study |
| <i>Sarcandra glabra</i>         | Chloranthaceae   | Chloranthales   | Chloranthales   | This study |
| <i>Buxus sinica</i>             | Buxaceae         | Buxales         | Basal eudicots  | This study |
| <i>Platanus x acerifolia</i>    | Platanaceae      | Proteales       | Basal eudicots  | This study |
| <i>Nelumbo necifera</i>         | Nelumbonaceae    | Proteales       | Basal eudicots  | NCBI       |
| <i>Meliosma arviolora</i>       | Sabiaceae        | Sabiaceae       | Basal eudicots  | This study |
| <i>Eschscholzia californica</i> | Papaveraceae     | Ranunculales    | Basal eudicots  | NCBI       |
| <i>Aquilegia coerulea</i>       | Ranunculaceae    | Ranunculales    | Basal eudicots  | Phytozome  |
| <i>Vitis vinifera</i>           | Vitaceae         | Vitales         | Core eudicots   | Phytozome  |
| <i>Solanum lycopersicum</i>     | Solanaceae       | Solanales       | Asterids        | Phytozome  |
| <i>Solanum tuberosum</i>        | Solanaceae       | Solanales       | Asterids        | Phytozome  |



|                               |                  |              |          |            |
|-------------------------------|------------------|--------------|----------|------------|
| <i>Mimulus guttatus</i>       | Scrophulariaceae | Lamiales     | Asterids | Phytozome  |
| <i>Lactuca sativa</i>         | Asteraceae       | Asterales    | Asterids | This study |
| <i>Artemisia annua</i>        | Asteraceae       | Asterales    | Asterids | NCBI       |
| <i>Eucalyptus grandis</i>     | Myrtaceae        | Myrtales     | Rosids   | Phytozome  |
| <i>Prunus persica</i>         | Rosaceae         | Rosales      | Rosids   | Phytozome  |
| <i>Fragaria vesca</i>         | Rosaceae         | Rosales      | Rosids   | Phytozome  |
| <i>Glycine max</i>            | Fabaceae         | Fabales      | Rosids   | Phytozome  |
| <i>Medicago truncatula</i>    | Fabaceae         | Fabales      | Rosids   | Phytozome  |
| <i>Phaseolus vulgaris</i>     | Fabaceae         | Fabales      | Rosids   | Phytozome  |
| <i>Citrus clementina</i>      | Rutaceae         | Sapindales   | Rosids   | Phytozome  |
| <i>Citrus sinensis</i>        | Rutaceae         | Sapindales   | Rosids   | Phytozome  |
| <i>Theobroma cacao</i>        | Sterculiaceae    | Malvales     | Rosids   | Phytozome  |
| <i>Gossypium raimondii</i>    | Malvaceae        | Malvales     | Rosids   | Phytozome  |
| <i>Carica papaya</i>          | Caricaceae       | Brassicales  | Rosids   | Phytozome  |
| <i>Arabidopsis thaliana</i>   | Brassicaceae     | Brassicales  | Rosids   | Phytozome  |
| <i>Arabidopsis lyrata</i>     | Brassicaceae     | Brassicales  | Rosids   | Phytozome  |
| <i>Theellungiella parvula</i> | Brassicaceae     | Brassicales  | Rosids   | Phytozome  |
| <i>Capsella rubella</i>       | Brassicaceae     | Brassicales  | Rosids   | Phytozome  |
| <i>Populus trichocarpa</i>    | Salicaceae       | Malpighiales | Rosids   | Phytozome  |
| <i>Ricinus communis</i>       | Euphorbiaceae    | Malpighiales | Rosids   | Phytozome  |
| <i>Manihot esculenta</i>      | Euphorbiaceae    | Malpighiales | Rosids   | Phytozome  |

---

**Supplementary Table 2: Information of 59 orthologous groups.**

| ID of OG | Length of alignment (after trimal, AA) | Number of species | Ratio of missing data (%) | Parsimony informative sites (%) | Gene ID ( <i>A. thaliana</i> ) | Length of <i>A. thaliana</i> genes (AA) | Functional annotation                                                                                   |
|----------|----------------------------------------|-------------------|---------------------------|---------------------------------|--------------------------------|-----------------------------------------|---------------------------------------------------------------------------------------------------------|
| 432206   | 389                                    | 55                | 7.95                      | 57.58                           | AT1G05055                      | 421                                     | Transcription factor TFIIH complex, involved in transcription and DNA repair and interacted with AtXPD. |
| 432635   | 289                                    | 55                | 3.14                      | 50.87                           | AT1G10830                      | 367                                     | 15-Cis-Zeta-Carotene Isomerase (Z-ISO).                                                                 |
| 432730   | 298                                    | 47                | 5.91                      | 57.05                           | AT1G14140                      | 305                                     | Uncoupling Protein 3 ( <i>UCP3</i> ), mitochondrial substrate carrier family protein.                   |
| 433020   | 410                                    | 52                | 5.45                      | 65.85                           | AT1G16280                      | 491                                     | DEAD-box RNA helicase, RNA Helicase 36 ( <i>RH36</i> ).                                                 |
| 432715   | 294                                    | 54                | 4.99                      | 57.82                           | AT1G48270                      | 326                                     | G-Protein-Coupled Receptor 1 ( <i>GCR1</i> ).                                                           |
| 432442   | 313                                    | 54                | 8.27                      | 72.84                           | AT1G52530                      | 319                                     | <i>Hus1</i> -like protein.                                                                              |
| 432589   | 317                                    | 52                | 3.27                      | 69.72                           | AT1G55760                      | 329                                     | BTB/POZ domain-containing protein.                                                                      |
| 431769   | 229                                    | 53                | 3.09                      | 66.38                           | AT1G65230                      | 286                                     | Function unknown.                                                                                       |
| 432437   | 616                                    | 52                | 5.42                      | 44.81                           | AT1G79600                      | 711                                     | Protein kinase superfamily protein, protein phosphorylation.                                            |
| MCM5     | 741                                    | 57                | 23.61                     | 49.12                           | AT2G07690                      | 727                                     | Minichromosome Maintenance 5 ( <i>MCM5</i> ).                                                           |
| 432859   | 761                                    | 54                | 12.58                     | 63.86                           | AT2G13540                      | 848                                     | ABA Hypersensitive 1 ( <i>ABH1</i> ), involved in ABA signaling and flowering.                          |
| 431559   | 316                                    | 54                | 4.34                      | 57.91                           | AT2G17265                      | 370                                     | Homoserine Kinase ( <i>HSK</i> ).                                                                       |
| 433581   | 306                                    | 53                | 9.75                      | 72.88                           | AT2G18410                      | 374                                     | Function unknown.                                                                                       |
| 434655   | 454                                    | 58                | 8.51                      | 44.71                           | AT2G20330                      | 648                                     | Transducin/WD40 repeat-like superfamily protein.                                                        |
| 431509   | 175                                    | 56                | 3.55                      | 40.00                           | AT2G26430                      | 416                                     | Arginine-rich Cyclin 1 ( <i>RCY1</i> ), encodes an ania-6a type arginine-rich cyclin.                   |
| 431208   | 318                                    | 54                | 11.16                     | 70.75                           | AT2G26590                      | 300                                     | Regulatory Particle Non-Atpase 13 ( <i>RPN13</i> ), involved in cell adhesion.                          |
| 432026   | 296                                    | 54                | 4.70                      | 64.86                           | AT2G31040                      | 350                                     | ATP synthase protein I-related.                                                                         |
| 432130   | 197                                    | 54                | 0.60                      | 65.99                           | AT2G34690                      | 206                                     | Accelerated Cell Death 11 ( <i>ACD11</i> ).                                                             |
| 432298   | 249                                    | 55                | 7.73                      | 66.27                           | AT2G35320                      | 307                                     | Eyes Absent Homolog ( <i>EYA</i> ), encodes a tyrosine-specific phosphatase.                            |
| 433773   | 276                                    | 43                | 1.81                      | 73.91                           | AT2G38760                      | 321                                     | Annexin 3 ( <i>ANNAT3</i> ).                                                                            |
| 432462   | 296                                    | 53                | 2.09                      | 57.43                           | AT3G10970                      | 365                                     | Haloacid dehalogenase-like hydrolase (HAD) superfamily protein, involved in metabolic process.          |

|        |      |    |       |       |           |      |                                                                                                                                                                                                                                                   |
|--------|------|----|-------|-------|-----------|------|---------------------------------------------------------------------------------------------------------------------------------------------------------------------------------------------------------------------------------------------------|
| 431639 | 469  | 54 | 11.33 | 79.32 | AT3G15180 | 519  | ARM repeat superfamily protein.                                                                                                                                                                                                                   |
| 434509 | 227  | 52 | 7.02  | 63.88 | AT3G17590 | 240  | Bushy Growth ( <i>BSH</i> ), represents a conserved subunit of plant SWI/SNF complexes.                                                                                                                                                           |
| 432200 | 330  | 52 | 4.05  | 53.94 | AT3G20020 | 435  | Protein Arginine Methyltransferase 6 ( <i>PRMT6</i> ), involved in protein amino acid methylation.                                                                                                                                                |
| 434734 | 325  | 55 | 4.93  | 62.46 | AT3G22590 | 415  | Plant Homologous to Parafibromin ( <i>PHP</i> ).                                                                                                                                                                                                  |
| MSH1   | 1036 | 52 | 29.55 | 57.05 | AT3G24320 | 1118 | Mutl Protein Homolog 1 ( <i>MSH1</i> ), promotes re-arrangements of mitochondrial genome.                                                                                                                                                         |
| 431723 | 257  | 52 | 9.24  | 60.31 | AT3G52210 | 355  | S-adenosyl-L-methionine-dependent methyltransferases superfamily protein, involved in mRNA capping.                                                                                                                                               |
| 434468 | 420  | 55 | 4.50  | 63.81 | AT3G53110 | 496  | Encodes a putative DEAD-Box RNA Helicase and has RNA-dependent ATPase activity, low Expression of Osmotically Responsive Genes 4 ( <i>LOS4</i> )                                                                                                  |
| SMC1   | 1172 | 56 | 16.44 | 63.91 | AT3G54670 | 1239 | Titan8 ( <i>TTN8</i> ), <i>SMC1</i> , encodes a member of the Arabidopsis cohesin complex that is essential for viability and sister chromatid alignment.                                                                                         |
| 435069 | 470  | 53 | 5.49  | 58.30 | AT3G59040 | 590  | Tetratricopeptide repeat (TPR)-like superfamily protein, function unknown.                                                                                                                                                                        |
| 432683 | 1044 | 55 | 13.49 | 68.30 | AT3G62360 | 1227 | Carbohydrate-binding-like fold; functions in carbohydrate binding                                                                                                                                                                                 |
| 435038 | 504  | 52 | 2.73  | 57.54 | AT4G00740 | 600  | Quasimodo 3 ( <i>QUA3</i> ), encodes a Golgi-localized type II membrane pectin methyltransferase regulating cell wall biosynthesis in suspension cells.                                                                                           |
| MLH1   | 722  | 55 | 27.15 | 55.54 | AT4G09140 | 737  | Mutl-homologue 1 ( <i>MLH1</i> ), encodes a protein with similarity to MutI DNA mismatch repair protein, from <i>E.coli</i> .                                                                                                                     |
| 433443 | 650  | 53 | 9.09  | 59.69 | AT4G11160 | 743  | Translation initiation factor 2, small GTP-binding protein, functions in GTP binding, GTPase activity, translation initiation factor activity; involved in translational initiation.                                                              |
| 434643 | 161  | 49 | 5.50  | 72.67 | AT4G18930 | 181  | RNA ligase/cyclic nucleotide phosphodiesterase family protein.                                                                                                                                                                                    |
| 432280 | 406  | 55 | 4.98  | 62.32 | AT4G23820 | 444  | Pectin lyase-like superfamily protein; functions in polygalacturonase activity; involved in carbohydrate metabolic process.                                                                                                                       |
| 431496 | 169  | 54 | 2.13  | 60.95 | AT4G29520 | 306  | Function unknown.                                                                                                                                                                                                                                 |
| 432473 | 422  | 48 | 7.99  | 70.14 | AT4G35880 | 524  | Eukaryotic aspartyl protease family protein, involved in proteolysis.                                                                                                                                                                             |
| 435119 | 344  | 52 | 10.49 | 70.93 | AT4G36440 | 394  | Function unknown.                                                                                                                                                                                                                                 |
| 432713 | 525  | 57 | 10.96 | 53.14 | AT4G38890 | 700  | FMN-linked oxidoreductases superfamily protein; functions in tRNA dihydrouridine synthase activity, FAD binding, catalytic activity, zinc ion binding, nucleic acid binding; involved in oxidation reduction, tRNA processing, metabolic process. |
| 432869 | 447  | 54 | 9.52  | 62.19 | AT5G03900 | 523  | Iron-sulphur cluster biosynthesis family protein.                                                                                                                                                                                                 |
| 431993 | 355  | 56 | 7.54  | 56.62 | AT5G08170 | 383  | Embryo Defective 1873 ( <i>EMB1873</i> ).                                                                                                                                                                                                         |
| 432875 | 232  | 55 | 7.77  | 79.31 | AT5G11810 | 306  | Function unknown.                                                                                                                                                                                                                                 |
| 434840 | 302  | 56 | 5.56  | 46.69 | AT5G12040 | 369  | Nitrilase/cyanide hydratase and apolipoprotein N-acyltransferase family protein; functions in hydrolase activity, acting on carbon-nitrogen (but not peptide) bonds, zinc ion binding;                                                            |

|        |      |    |       |       |           |      |                                                                                                                                                                                                                                                                                                                                                                                                                   |
|--------|------|----|-------|-------|-----------|------|-------------------------------------------------------------------------------------------------------------------------------------------------------------------------------------------------------------------------------------------------------------------------------------------------------------------------------------------------------------------------------------------------------------------|
| 432842 | 564  | 53 | 5.16  | 46.81 | AT5G13400 | 624  | involved in nitrogen compound metabolic process.                                                                                                                                                                                                                                                                                                                                                                  |
| 434860 | 330  | 53 | 3.31  | 45.45 | AT5G17230 | 437  | Major facilitator superfamily protein; functions in transporter activity; involved in oligopeptide transport.                                                                                                                                                                                                                                                                                                     |
| 432801 | 525  | 55 | 11.00 | 75.81 | AT5G20170 | 653  | Encodes phytoene synthase ( <i>PSY</i> ).                                                                                                                                                                                                                                                                                                                                                                         |
| 433634 | 545  | 57 | 8.19  | 65.14 | AT5G42480 | 801  | RNA polymerase II transcription mediators; functions in RNA polymerase II transcription mediator activity; involved in regulation of transcription from RNA polymerase II promoter. Accumulation and replication of chloroplasts 6 ( <i>ARC6</i> ). Probably involved in functions in the assembly and/or stabilization of the plastid-dividing FtsZ ring, inhibiting FtsZ filament formation in the chloroplast. |
| 433902 | 315  | 56 | 12.53 | 52.06 | AT5G51140 | 395  | Pseudouridine synthase family protein; functions in pseudouridine synthase activity; involved in pseudouridine synthesis, RNA modification.                                                                                                                                                                                                                                                                       |
| 431271 | 841  | 56 | 8.64  | 61.24 | AT5G51430 | 836  | Embryo Yellow ( <i>EYE</i> ). It is likely to be involved in transport or retention of Golgi-localized proteins and in maintenance of Golgi morphology.                                                                                                                                                                                                                                                           |
| 434965 | 629  | 51 | 7.52  | 60.73 | AT5G52580 | 673  | RabGAP/TBC domain-containing protein; functions in RAB GTPase activator activity; involved in regulation of Rab GTPase activity.                                                                                                                                                                                                                                                                                  |
| 431690 | 121  | 53 | 0.81  | 52.07 | AT5G54855 | 146  | Pollen Ole e 1 allergen and extensin family protein; function unknown.                                                                                                                                                                                                                                                                                                                                            |
| 434304 | 345  | 54 | 9.22  | 59.13 | AT5G62030 | 453  | Diphthamide synthesis DPH2 family protein, function unknown.                                                                                                                                                                                                                                                                                                                                                      |
| SMC2   | 1158 | 56 | 23.21 | 55.79 | AT5G62410 | 1175 | Structural Maintenance of Chromosomes 2 ( <i>SMC2</i> ).                                                                                                                                                                                                                                                                                                                                                          |
| 434354 | 519  | 53 | 8.90  | 71.48 | AT5G64440 | 607  | Fatty Acid Amide Hydrolase ( <i>FAAH</i> ).                                                                                                                                                                                                                                                                                                                                                                       |
| 432653 | 313  | 54 | 7.07  | 70.93 | AT5G64510 | 424  | Tunicamycin Induced 1 ( <i>TINI</i> ), a plant-specific ER stress-inducible protein.                                                                                                                                                                                                                                                                                                                              |
| 431774 | 308  | 54 | 3.38  | 53.25 | AT5G65860 | 346  | Ankyrin repeat family protein; functions in methyltransferase activity; involved in metabolic process.                                                                                                                                                                                                                                                                                                            |
| 431562 | 333  | 54 | 9.97  | 58.86 | AT5G66180 | 395  | S-adenosyl-L-methionine-dependent methyltransferases superfamily protein.                                                                                                                                                                                                                                                                                                                                         |
| 433564 | 214  | 56 | 1.88  | 54.67 | AT5G66530 | 307  | Galactose mutarotase-like superfamily protein; functions in carbohydrate binding, isomerase activity, aldose 1-epimerase activity, catalytic activity; involved in galactose metabolic process, carbohydrate metabolic process.                                                                                                                                                                                   |

---

**Supplementary Table 3: Information of genes from the plastid inverted repeat regions.**

| <b>Gene</b>         | <b>Length<br/>(bp)</b> | <b>PI_sites<br/>(bp)</b> | <b>PI_percentage<br/>(%)</b> |
|---------------------|------------------------|--------------------------|------------------------------|
| trnI.GAU            | 72                     | 2                        | 2.8                          |
| trnR.AGC            | 74                     | 3                        | 4.1                          |
| trnA.UGC            | 73                     | 3                        | 4.1                          |
| trnL.CAA            | 81                     | 5                        | 6.2                          |
| trnV.GAC            | 72                     | 5                        | 6.9                          |
| <i>rrn16</i>        | 1491                   | 167                      | 11.2                         |
| <i>rrn23</i>        | 2787                   | 316                      | 11.3                         |
| trnI.CAU            | 74                     | 9                        | 12.2                         |
| trnN.GUU            | 72                     | 9                        | 12.5                         |
| <i>rrn5</i>         | 121                    | 17                       | 14.0                         |
| <i>rrn4.5</i>       | 103                    | 18                       | 17.5                         |
| <i>rps12</i>        | 255                    | 47                       | 18.4                         |
| <i>ndhB</i>         | 1530                   | 307                      | 20.1                         |
| trnA.UGC.intron     | 761                    | 162                      | 21.3                         |
| rps12.intron        | 519                    | 113                      | 21.8                         |
| ndhB.intron         | 694                    | 153                      | 22.0                         |
| trnI.GAU.intron     | 892                    | 215                      | 24.1                         |
| rpl2.intron         | 608                    | 159                      | 26.2                         |
| <i>rps7</i>         | 465                    | 145                      | 31.2                         |
| rrn4.5.rrn5.spacer  | 222                    | 74                       | 33.3                         |
| rpl2.rpl23.spacer   | 18                     | 6                        | 33.3                         |
| ycf2.trnL.spacer    | 917                    | 326                      | 35.6                         |
| <i>rpl2</i>         | 822                    | 315                      | 38.3                         |
| trnA.rrn23.spacer   | 143                    | 55                       | 38.5                         |
| ndhB.rps7.spacer    | 304                    | 117                      | 38.5                         |
| trnV.rrn16.spacer   | 197                    | 78                       | 39.6                         |
| rps7.rps12.spacer   | 49                     | 20                       | 40.8                         |
| trnL.ndhB.spacer    | 550                    | 234                      | 42.5                         |
| rrn23.rrn4.5.spacer | 95                     | 41                       | 43.2                         |
| rpl23.trnI.spacer   | 158                    | 70                       | 44.3                         |
| rrn16.trnI.spacer   | 240                    | 107                      | 44.6                         |
| rps12.trnV.spacer   | 1647                   | 736                      | 44.7                         |
| <i>rpl23</i>        | 264                    | 120                      | 45.5                         |
| trnI.trnA.spacer    | 63                     | 29                       | 46.0                         |
| trnN.ycf1.spacer    | 271                    | 128                      | 47.2                         |
| trnR.trnN.spacer    | 444                    | 212                      | 47.7                         |
| rrn5.trnR.spacer    | 177                    | 85                       | 48.0                         |
| <i>ycf2</i>         | 6606                   | 3531                     | 53.5                         |
| trnI.ycf2.spacer    | 60                     | 37                       | 61.7                         |
| <i>ycf1</i>         | 711                    | 457                      | 64.3                         |
| Total               | 24702                  | 8633                     | 34.9                         |

**Supplementary Table 4: Information of the 83 plastid genes.** Genes from the inverted repeat regions are highlighted in bold.

| Gene          | Length<br>(bp) | PI_sites<br>(bp) | PI_percentage<br>(%) |
|---------------|----------------|------------------|----------------------|
| <i>rrn16</i>  | 1491           | 167              | 11.2                 |
| <i>rrn23</i>  | 2786           | 319              | 11.5                 |
| <i>rrn5</i>   | 121            | 17               | 14.0                 |
| <i>rrn4.5</i> | 102            | 17               | 16.7                 |
| <i>ndhB</i>   | 1530           | 302              | 19.7                 |
| <i>rps12</i>  | 369            | 94               | 25.5                 |
| <i>psbD</i>   | 1059           | 288              | 27.2                 |
| <i>petN</i>   | 87             | 25               | 28.7                 |
| <i>psbL</i>   | 114            | 33               | 28.9                 |
| <i>psbA</i>   | 1059           | 307              | 29.0                 |
| <i>psbF</i>   | 117            | 34               | 29.1                 |
| <i>petB</i>   | 645            | 195              | 30.2                 |
| <i>atpH</i>   | 243            | 75               | 30.9                 |
| <i>rps7</i>   | 465            | 146              | 31.4                 |
| <i>psbC</i>   | 1369           | 434              | 31.7                 |
| <i>petD</i>   | 480            | 153              | 31.9                 |
| <i>psbE</i>   | 249            | 80               | 32.1                 |
| <i>psaB</i>   | 2202           | 709              | 32.2                 |
| <i>psaA</i>   | 2250           | 732              | 32.5                 |
| <i>psbN</i>   | 129            | 43               | 33.3                 |
| <i>psbB</i>   | 1524           | 523              | 34.3                 |
| <i>ycf3</i>   | 501            | 176              | 35.1                 |
| <i>psbJ</i>   | 120            | 43               | 35.8                 |
| <i>psaC</i>   | 243            | 88               | 36.2                 |
| <i>rbcL</i>   | 1425           | 526              | 36.9                 |
| <i>petG</i>   | 111            | 41               | 36.9                 |
| <i>rpl2</i>   | 816            | 310              | 38.0                 |
| <i>atpI</i>   | 741            | 288              | 38.9                 |
| <i>psbI</i>   | 108            | 42               | 38.9                 |
| <i>atpB</i>   | 1494           | 588              | 39.4                 |
| <i>psbT</i>   | 99             | 39               | 39.4                 |
| <i>psbM</i>   | 96             | 38               | 39.6                 |
| <i>psbZ</i>   | 186            | 74               | 39.8                 |
| <i>ndhC</i>   | 360            | 144              | 40.0                 |
| <i>rpl23</i>  | 264            | 110              | 41.7                 |
| <i>ndhH</i>   | 1179           | 500              | 42.4                 |
| <i>atpA</i>   | 1518           | 648              | 42.7                 |
| <i>ndhI</i>   | 474            | 211              | 44.5                 |
| <i>ndhE</i>   | 303            | 139              | 45.9                 |
| <i>ndhK</i>   | 675            | 314              | 46.5                 |
| <i>petA</i>   | 960            | 447              | 46.6                 |
| <i>psbH</i>   | 219            | 102              | 46.6                 |
| <i>ndhJ</i>   | 474            | 222              | 46.8                 |
| <i>psaJ</i>   | 132            | 62               | 47.0                 |
| <i>rps16</i>  | 231            | 109              | 47.2                 |

|                    |       |       |      |
|--------------------|-------|-------|------|
| <i>rpl16</i>       | 402   | 199   | 49.5 |
| <i>rpl14</i>       | 366   | 185   | 50.5 |
| <i>ndhA</i>        | 1089  | 552   | 50.7 |
| <i>rpoB</i>        | 3213  | 1654  | 51.5 |
| <i>rpl36</i>       | 111   | 58    | 52.3 |
| <b><i>ycf2</i></b> | 6768  | 3587  | 53.0 |
| <i>rpoC1</i>       | 1980  | 1050  | 53.0 |
| <i>ndhD</i>        | 1488  | 793   | 53.3 |
| <i>psaI</i>        | 108   | 58    | 53.7 |
| <i>rps4</i>        | 591   | 318   | 53.8 |
| <i>psbK</i>        | 183   | 101   | 55.2 |
| <i>ndhG</i>        | 528   | 292   | 55.3 |
| <i>rps14</i>       | 300   | 166   | 55.3 |
| <i>rps18</i>       | 285   | 159   | 55.8 |
| <i>infA</i>        | 231   | 129   | 55.8 |
| <i>rps2</i>        | 708   | 399   | 56.4 |
| <i>atpE</i>        | 398   | 228   | 57.3 |
| <i>petL</i>        | 93    | 54    | 58.1 |
| <i>ycf4</i>        | 546   | 318   | 58.2 |
| <i>rps19</i>       | 276   | 163   | 59.1 |
| <i>atpF</i>        | 552   | 330   | 59.8 |
| <i>ndhF</i>        | 1956  | 1176  | 60.1 |
| <i>rps11</i>       | 414   | 251   | 60.6 |
| <i>rps8</i>        | 399   | 243   | 60.9 |
| <i>rpl33</i>       | 192   | 119   | 62.0 |
| <i>ccsA</i>        | 807   | 502   | 62.2 |
| <i>rpoA</i>        | 999   | 624   | 62.5 |
| <i>accD</i>        | 1452  | 914   | 62.9 |
| <i>rpoC2</i>       | 4104  | 2618  | 63.8 |
| <b><i>ycf1</i></b> | 714   | 458   | 64.1 |
| <i>cemA</i>        | 675   | 444   | 65.8 |
| <i>rps3</i>        | 639   | 421   | 65.9 |
| <i>rpl20</i>       | 342   | 228   | 66.7 |
| <i>clpP</i>        | 585   | 392   | 67.0 |
| <i>rpl32</i>       | 141   | 95    | 67.4 |
| <i>rps15</i>       | 249   | 168   | 67.5 |
| <i>rpl22</i>       | 321   | 222   | 69.2 |
| <i>matK</i>        | 1416  | 1094  | 77.3 |
| Total              | 66741 | 30716 | 46   |

---

**Supplementary Table 5: Information of trees reconstructed by using IR genes with different evolutionary rates.** The dash indicates incongruent topology.

| <b>matrix</b> | <b>gene number</b> | <b>length (bp)</b> | <b>PI (%)</b> | <b>PI sites (bp)</b> | <b>CC (bootstrap)</b> | <b>CCE (bootstrap)</b> | <b>Mesodicots (bootstrap)</b> | <b>Mesangiospermae (bootstrap)</b> |
|---------------|--------------------|--------------------|---------------|----------------------|-----------------------|------------------------|-------------------------------|------------------------------------|
| IR_less_30    | 18                 | 10,279             | 16.6          | 1,710                | 25%                   | 26%                    | 34%                           | 100%                               |
| IR_greater_30 | 22                 | 14,423             | 47.9          | 6,923                | 88%                   | 58%                    | 62%                           | 100%                               |
| IR_less_40    | 26                 | 13,367             | 21.1          | 2,826                | 63%                   | 65%                    | --                            | 100%                               |
| IR_greater_40 | 14                 | 11,335             | 51.2          | 5,807                | 70%                   | 53%                    | 64%                           | 96%                                |
| IR_less_50    | 37                 | 17,325             | 26.6          | 4,608                | 70%                   | 49%                    | 55%                           | 100%                               |
| IR_greater_50 | 3                  | 7,377              | 54.6          | 4,025                | 71%                   | 73%                    | 46%                           | 99%                                |
| IR_all_genes  | 40                 | 24,702             | 34.9          | 8,633                | 86%                   | 83%                    | 80%                           | 100%                               |

CC: (Ceratophyllales, Chloranthales);

CCE: ((Ceratophyllales, Chloranthales), Eudicots);



**Supplementary Table 6: Divergence times of major nodes estimated by r8s and BEAST using 1<sup>st</sup> codon position, 1<sup>st</sup> + 2<sup>nd</sup> codon positions, and all codon positions, respectively, with the eudicot calibration (125 Myr) being treated as fixed or the minimum. Ranges correspond to 95% highest posterior density (HPD).**

|                                                  | with eudicot calibration being the minimum<br>(r8s) |                                          |               | with eudicot calibration being fixed<br>(r8s) |                                          |               | with eudicot calibration being fixed<br>(BEAST) |                                          |               |
|--------------------------------------------------|-----------------------------------------------------|------------------------------------------|---------------|-----------------------------------------------|------------------------------------------|---------------|-------------------------------------------------|------------------------------------------|---------------|
|                                                  | 1 <sup>st</sup> codon                               | 1 <sup>st</sup> + 2 <sup>nd</sup> codons | All codons    | 1 <sup>st</sup> codon                         | 1 <sup>st</sup> + 2 <sup>nd</sup> codons | All codons    | 1 <sup>st</sup> codon                           | 1 <sup>st</sup> + 2 <sup>nd</sup> codons | All codons    |
| Angiospermae                                     | 239 (227-252)                                       | 237 (227-249)                            | 240 (233-248) | 227 (216-241)                                 | 225 (216-240)                            | 225 (216-232) | 231 (191-280)                                   | 221 (193-261)                            | 209 (186-246) |
| Nymphaeales + Austrobaileyales + Mesangiospermae | 222 (214-230)                                       | 222 (215-229)                            | 227 (222-233) | 208 (200-216)                                 | 208 (202-214)                            | 210 (205-214) | 205 (173-266)                                   | 200 (177-240)                            | 195 (175-218) |
| Austrobaileyales + Mesangiospermae               | 209 (203-218)                                       | 208 (201-214)                            | 211 (205-217) | 193 (187-200)                                 | 192 (187-197)                            | 190 (187-194) | 186 (158-250)                                   | 181 (156-216)                            | 180 (160-195) |
| Mesangiospermae                                  | 189 (182-197)                                       | 187 (181-195)                            | 191 (185-196) | 171 (166-176)                                 | 170 (166-175)                            | 167 (164-170) | 161 (141-216)                                   | 154 (142-176)                            | 170 (150-171) |
| Mesodicots                                       | 185 (178-192)                                       | 182 (177-189)                            | 187 (182-192) | 165 (162-170)                                 | 163 (160-168)                            | 162 (159-165) | 152 (128-180)                                   | 148 (138-167)                            | 155 (143-167) |
| Chloranthaceae + Ceratophyllaceae + eudicots     | 179 (173-186)                                       | 177 (171-184)                            | 182 (177-187) | 158 (155-163)                                 | 157 (154-161)                            | 157 (154-159) | 144 (132-165)                                   | 141 (133-156)                            | 149 (140-160) |
| Chloranthaceae + Ceratophyllaceae                | 165 (158-173)                                       | 165 (158-172)                            | 170 (164-174) | 146 (142-151)                                 | 146 (142-151)                            | 146 (143-149) | 126 (71-151)                                    | 126 (104-142)                            | 133 (106-147) |
| magnoliids                                       | 172 (165-179)                                       | 169 (161-174)                            | 175 (169-180) | 154 (149-161)                                 | 151 (147-155)                            | 152 (149-155) | 131 (34-163)                                    | 136 (115-151)                            | 136 (122-150) |
| monocots                                         | 166 (160-173)                                       | 166 (160-171)                            | 169 (165-174) | 151 (145-156)                                 | 151 (145-156)                            | 149 (147-152) | 143 (119-193)                                   | 134 (120-158)                            | 138 (127-149) |
| eudicots                                         | 151 (146-157)                                       | 149 (146-155)                            | 156 (151-161) | 125                                           | 125                                      | 125           | 125                                             | 125 (125-128)                            | 126 (115-126) |
