# Supplementary material for: Resolution of deep angiosperm phylogeny using conserved nuclear genes and estimates of early divergence times
Source: Nat Commun. 2014 Sep 24;5:4956. doi: 10.1038/ncomms5956 (PMC4200517; doi:10.1038/ncomms5956)
Supplement: Supplementary Data 1 — Gene copy numbers of 59 OGs in 30 species with sequenced genomes. [file ncomms5956-s2.xlsx]

## Sheet: Sheet1
Supplementary Data 1: Gene copy numbers of 59 OGs in 30 species with sequenced genomes.
ID Species	Aly	Ath	Cru	Tha	Cpa	Tca	Gra	Ccl	Csi	Ptr	Rco	Mes	Gma	Pvu	Mtr	Ppe	Fve	Egr	Sly	Stu	Mgu	Vvi	Aco	Sbi	Zma	Sit	Pvi	Osa	Bdi	Ppa
431208	1	1	1	2	1	2	1	3	1	1	1	1	2	1	2	1	1	1	1	-	1	1	1	1	1	-	2	1	1	1
431271	1	1	1	1	1	1	1	1	1	1	1	1	2	1	2	1	1	1	1	1	1	1	1	1	1	1	2	1	2	1
431496	1	1	1	1	1		1	1	1	1	1	2	2	1	5	1	1	1	1	-	-	1	1	1	1	1	3	1	1	-
431509	1	1	1	2	1	1	1	2	1	1	1	1	2	2	2	2	1	1	1	1	1	1	1	1	1	1	4	1	2	2
431559	2	1	2	1	1	1	1	1	1	1	1	1	1	1	1	1	1	-	1	1	1	1	1	1	1	2	4	1	1	1
431562	1	1	1	2	1	1	1	1	1	1	1	1	1	1	1	1	1	1	1	2	1	1	1	1	1	1	2	1	1	1
431639	1	1	1	1	1	1	1	2	1	1	1	1	1	1	1	1	1	3	1	-	1	1	1	1	1	1	5	1	1	1
431690	1	1	1	1	1	1	2	1	1	1	1	1	2	2	1	1	1	1	1	1	1	1	1	1	1	1	2	1	1	-
431723	1	1	1	1	-	1	1	6	1	1	1	2	2	1	1	1	1	1	1	2	1	1	1	1	3	1	3	1	2	-
431769	1	1	1	1	1	1	1	1	1	1	1	1	2	1	1	1	1	1	1	2	1	1	1	1	1	1	3	1	1	2
431774	1	1	1	1	1	1	1	1	1	1	1	1	2	1	2	1	1	1	1	1	1	1	1	1	1	1	3	1	1	1
431993	1	1	2	1	1	1	1	1	1	1	1	1	2	1	2	1	1	1	1	1	1	1	1	1	1	1	3	1	1	2
432026	1	1	1	1	1	1	1	1	1	1	1	2	1	1	1	1	1	2	2	2	1	1	1	1	1	3	3	1	2	1
432130	1	1	1	1	1	1	1	1	1	2	1	1	2	1	1	1	1	2	1	2	1	1	2	1	1	1	1	2	1	1
432200	1	1	1	1	1	1	2	1	1	2	1	1	3	1	1	1	1	1	1	-	1	1	1	1	1	1	2	2	1	1
432206	1	1	1	1	1	1	1	2	2	1	1	1	2	1	1	1	1	1	1	-	1	1	2	1	1	1	1	1	1	1
432280	1	1	1	1	1	1	2	1	1	1	1	2	3	2	1	1	1	2	1	2	-	1	1	1	1	1	2	1	1	1
432298	2	1	1	1	1	1	1	1	1	1	-	1	2	1	1	1	1	1	1	2	1	1	1	1	2	1	2	1	1	2
432437	1	1	1	1	1	1	2	1	1	1	1	1	2	1	1	1	1	1	1	3	1	1	1	1	2	1	1	1	1	1
432442	1	1	1	1	1	1	1	3	2	1	1	1	1	1	1	1	-	-	1	2	1	1	1	1	1	1	1	1	1	1
432462	1	1	1	1	1	1	1	1	1	2	1	2	1	1	1	1	1	1	1	-	1	1	1	1	1	1	2	1	1	1
432473	2	2	2	2	2	2	4	1	2	1	2	2	6	3	3	2	1	2	3	3	-	1	2	1	1	1	1	1	1	1
432589	1	1	1	1	1	1	2	1	1	1	1	1	2	1	1	1	-	1	2	2	3	1	1	1	1	1	1	1	1	1
432635	1	1	1	1	1	1	1	1	1	1	1	1	2	1	1	1	1	1	1	2	1	1	1	1	1	1	2	1	1	2
432653	1	1	1	1	1	1	2	1	1	1	1	2	2	1	1	1	-	1	1	1	1	2	1	1	1	1	2	1	1	1
432683	1	1	1	1	1	1	1	1	1	1	1	1	2	1	1	1	1	1	1	-	1	1	1	1	1	1	1	1	1	1
432713	1	1	1	1	-	1	1	1	1	1	1	1	1	1	1	1	1	1	1	2	1	1	1	1	1	1	1	1	1	1
432715	1	1	1	1	1	1	1	1	1	1	1	1	2	1	1	1	1	1	1	1	1	1	1	1	1	1	1	1	1	2
432730	1	1	1	1	1	1	1	1	1	1	1	1	2	1	2	1	1	1	1	1	1	1	1	1	1	1	1	1	1	-
432801	1	1	1	1	1	2	1	1	1	1	1	1	3	1	1	1	1	1	1	2	1	1	1	1	2	1	2	1	1	1
432842	1	1	1	1	1	1	1	1	1	1	1	1	1	1	1	1	1	1	1	1	1	1	1	1	2	1	2	1	1	1
432859	1	1	1	1	1	1	1	1	1	1	1	1	1	1	1	1	1	1	1	-	1	1	1	1	1	1	2	1	1	2
432869	1	1	1	1	1	1	1	1		1	1	1	1	1	1	1	1	1	1	-	1	1	1	1	1	1	1	1	1	1
432875	1	1	1	1	1	1	1	1	1	1	1	1	2	1	1	1	1	1	1	1	1	1	1	1	1	1	2	1	1	1
433020	1	1	1	1	1	1	1	1	1	1	1	1	2	1	1	1	1	2	1	2	3	1	2	1	1	1	2	-	1	2
433443	1	1	1	1	1	1	1	1	1	1	1	1	2	1	1	1	2	2	2	3	2	1	1	1	1	1	1	1	1	2
433564	1	1	1	1	1	1	1	1	1	1	1	1	2	1	1	1	1	1	1	1	1	1	1	1	1	1	1	1	1	1
433581	1	1	1	1	1	1	1	1	1	3	1	1	2	1	1	1	1	1	1	1	1	1	1	1	1	1	1	1	1	1
433634	1	1	1	1	1	1	-	1	1	1	1	1	2	1	1	1	1	1	1	3	1	1	1	1	1	1	1	1	1	2
433773	1	1	1	1	1	1	1	1	1	1	1	2	2	1	1	1	1	-	2	3	3	5	1	1	1	1	2	1	1	1
433902	1	1	1	1	-	1	1	1	1	1	1	1	1	1	1	1	1	3	1	-	1	1	1	2	2	2	2	2	2	1
434304	2	2	2	2	1	1	2	2	2	1	1	1	2	1	1	1	1	2	1	1	1	1	1	1	1	1	1	1	1	1
434354	1	1	1	1	2	2	3	1	1	1	1	1	2	1	1	1	1	2	4	4	1	1	1	1	-	1	-	1	1	1
434468	1	1	1	1	1	1	1	1	1	1	1	2	2	1	1	1	1	1	2	1	1	2	1	1	1	1	2	-	1	2
434509	1	1	1	1	-	1	2	1	1	1	1	1	2	1	1	1	1	1	1	-	1	1	1	1	1	1	2	1	1	-
434643	5	4	6	6	1	1	2	2	2	1	2	2	3	2	2	3	2	3	3	1	2	1	1	1	1	1	2	1	1	1
434655	1	1	1	1	1	1	1	1	1	1	1	1	1	1	1	-	1	1	1	1	1	1	1	1	1	1	1	1	1	1
434734	1	1	1	1	1	1	1	1	1	2	1	1	1	1	1	1	1	1	1	3	1	1	1	1	1	1	2	1	1	1
434840	1	1	1	1	1	1	2	1	1	1	1	1	1	1	1	1	1	1	3	3	2	1	2	1	1	1	2	1	1	2
434860	1	1	1	1	-	2	3	1	1	4	1	2	6	3	2	2	2	4	3	5	3	3	3	1	1	1	2	1	1	3
434965	1	1	1	1	1	1	2	1	1	1	1	1	2	1	1	1	1	1	2	1	1	1	1	1	1	1	1	1	1	1
435038	1	1	1	1	1	1	2	1	1	1	1	1	2	2	1	1	1	1	1	1	1	1	1	1	1	1	1	1	1	1
435069	1	1	1	1	1	1	1	1	1	1	1	-	2	1	1	1	1	1	1	2	1	1	1	1	1	1	1	1	1	1
435119	1	1	1	1	1	1	1	1	1	1	1	1	2	1	1	1	1	1	-	-	1	1	1	1	1	1	1	1	1	1
SMC1	1	1	1	1	1	1	1	1	1	1	1	1	2	2	1	2	2	1	1	-	1	1	1	1	1	1	1	1	1	1
SMC2	1	2	2	2	1	1	2	1	1	2	1	1	2	2	1	2	2	1	1	-	1	1	1	1	-	1	2	1	1	1
MCM5	1	1	1	1	1	1	1	1	1	2	1	1	2	1	-	1	1	1	1	1	1	1	1	1	1	1	1	1	1	1
MLH1	1	1	1	1	1	1	1	1	1	1	1	1	1	1	1	1	1	1	1	-	1	1	1	1	1	1	2	1	1	1
MSH1	1	1	1	1	1	1	1	1	1	1	1	1	1	1	1	1	1	1	1	-	1	1	1	1	1	1	1	1	1	1
Notes: Aly: Arabidopsis lyrata; Ath: Arabidopsis thaliana; Cru: Capsella rubella; Tha: Thellungiella parvula; Cpa: Carica papaya; Tca: Theobroma cacao; Gra: Gossypium raimondii; Ccl: Citrus clementine; Csi: Citrus sinensis; Ptr: Popolus trichocarpa; Rco: Ricinus communis; Mes: Manihot esculenta; Gma: Glycine max; Pvu: Phaseolus vulgaris; Mtr: Medicago truncatula; Ppe: Prunus persica; Fve: Fragari…
Numbers: gene copy number, eg. 1, 2, 3; -: gene has not been found.
